# Supplementary material for: Sex Specific Gene Regulation and Expression QTLs in Mouse Macrophages from a Strain Intercross
Source: PLoS One. 2008 Jan 16;3(1):e1435. doi: 10.1371/journal.pone.0001435 (PMC2174529; doi:10.1371/journal.pone.0001435)
Supplement: Table S1 — (2.21 MB XLS) [file pone.0001435.s001.xls]

## Sheet: Sheet1
Supplemental Table S1. Female eQTLs sorted by genomic location.
lod	gender	marker	marker chr	marker Mb	probe	probe chr	probe Mb	eqtl type	Gene Symbol	Description
3.69245	F	rs13475698	1	3.7612	1450756_s_at	1	80.1451	trans	Cul3	cullin 3
3.90479	F	rs13475698	1	3.7612	1428045_a_at	3	51.3528	trans	Elf2	E74-like factor 2
3.4006	F	rs13475698	1	3.7612	1451254_at	4	56.8451	trans	Ikbkap	inhibitor of kappa light polypeptide enhancer in B-cells, kinase complex-associated protein
3.10862	F	rs13475698	1	3.7612	1435202_at	7	24.7905	trans	Zfp574	zinc finger protein 574
3.96419	F	rs13475698	1	3.7612	1443814_x_at	9	89.8737	trans	Ctsh	cathepsin H
3.45059	F	rs13475698	1	3.7612	1424126_at	9	106.092	trans	Alas1	aminolevulinic acid synthase 1
8.727	F	rs13475698	1	3.7612	1434971_x_at	1	4.76646	cis	---	---
5.13787	F	rs4222142	1	4.7872	1434447_at	6	17.5221	trans	AI838057	expressed sequence AI838057
3.25472	F	rs4222142	1	4.7872	1433500_at	6	39.392	trans	Dennd2a	DENN/MADD domain containing 2A
4.23298	F	rs4222142	1	4.7872	1452985_at	9	60.6683	trans	Uaca	uveal autoantigen with coiled-coil domains and ankyrin repeats
3.47351	F	rs4222142	1	4.7872	1436023_at	10	20.0019	trans	Bclaf1	BCL2-associated transcription factor 1
12.2523	F	rs4222142	1	4.7872	1419257_at	1	4.84778	cis	Tcea1	transcription elongation factor A (SII) 1
3.39085	F	rs13475703	1	5.1515	1456433_at	ambig	ambig	ambig	Rcbtb1	regulator of chromosome condensation (RCC1) and BTB (POZ) domain containing protein 1
3.36939	F	rs13475703	1	5.1515	1448520_at	3	103.932	trans	Dclre1b	DNA cross-link repair 1B, PSO2 homolog (S. cerevisiae)
3.42711	F	rs13475703	1	5.1515	1416471_at	3	106.631	trans	Cept1	choline/ethanolaminephosphotransferase 1
3.31322	F	rs13475703	1	5.1515	1416330_at	7	142.862	trans	Cd81	CD 81 antigen
3.0392	F	rs13475703	1	5.1515	1416513_at	9	108.338	trans	Lamb2	laminin, beta 2
25.4078	F	rs13475703	1	5.1515	1430798_x_at	1	4.77132	cis	Mrpl15	mitochondrial ribosomal protein L15
19.4596	F	rs13475703	1	5.1515	1419258_at	1	4.84778	cis	Tcea1	transcription elongation factor A (SII) 1
6.61169	F	rs13475703	1	5.1515	1456607_at	1	9.70514	cis	Vcpip1	valosin containing protein (p97)/p47 complex interacting protein 1
3.01509	F	rs6367205	1	7.6698	1446098_at	ambig	ambig	ambig	Zfp407	Zinc finger protein 407
3.07801	F	c1.loc4	1	7.7612	1451362_at	1	133.695	trans	Rab7l1	RAB7, member RAS oncogene family-like 1
3.78411	F	rs3674670	1	9.1483	1438832_x_at	9	109.929	trans	Dhx30	DEAH (Asp-Glu-Ala-His) box polypeptide 30
7.81858	F	rs3674670	1	9.1483	1425189_a_at	1	4.76329	cis	Mrpl15	mitochondrial ribosomal protein L15
25.1359	F	rs13475719	1	9.2692	1455123_at	ambig	ambig	ambig	St18	suppression of tumorigenicity 18
3.49028	F	c1.loc6	1	9.7612	1460184_at	3	131.223	trans	Hadhsc	L-3-hydroxyacyl-Coenzyme A dehydrogenase, short chain
7.07359	F	rs6241531	1	10.1047	1434563_at	1	192.473	trans	Rps6kc1	ribosomal protein S6 kinase polypeptide 1
3.87649	F	rs6241531	1	10.1047	1435763_at	11	118.959	trans	Tbc1d16	TBC1 domain family, member 16
14.1595	F	rs6241531	1	10.1047	1436793_at	1	6.81785	cis	St18	suppression of tumorigenicity 18
3.01349	F	rs4222149	1	11.5041	1436363_a_at	8	87.5987	trans	Nfix	nuclear factor I/X
3.24031	F	rs4222149	1	11.5041	1417928_at	11	53.8984	trans	Pdlim4	PDZ and LIM domain 4
5.35924	F	rs4222149	1	11.5041	1448609_at	15	78.2268	trans	Tst	thiosulfate sulfurtransferase, mitochondrial
3.05658	F	rs13475726	1	12.2105	1435829_at	ambig	ambig	ambig	B930008K04Rik	RIKEN cDNA B930008K04 gene
3.15857	F	rs13475726	1	12.2105	1456890_at	ambig	ambig	ambig	Ddx58	DEAD (Asp-Glu-Ala-Asp) box polypeptide 58
3.37076	F	rs13475726	1	12.2105	1442590_at	ambig	ambig	ambig	Tnfrsf23	tumor necrosis factor receptor superfamily, member 23
3.37983	F	rs13475726	1	12.2105	1449317_at	ambig	ambig	ambig	Cflar	CASP8 and FADD-like apoptosis regulator
3.65562	F	rs13475726	1	12.2105	1434688_x_at	ambig	ambig	ambig	Drg1	developmentally regulated GTP binding protein 1
4.3377	F	rs13475726	1	12.2105	1456660_a_at	ambig	ambig	ambig	0610010F05Rik	RIKEN cDNA 0610010F05 gene
4.41975	F	rs13475726	1	12.2105	1444420_at	ambig	ambig	ambig	E230032D23Rik	RIKEN cDNA E230032D23 gene
4.49505	F	rs13475726	1	12.2105	1428953_at	ambig	ambig	ambig	Otud7b	OTU domain containing 7B
4.78158	F	rs13475726	1	12.2105	1449799_s_at	ambig	ambig	ambig	Pkp2	plakophilin 2
7.92528	F	rs13475726	1	12.2105	1450044_at	1	59.4271	trans	Fzd7	frizzled homolog 7 (Drosophila)
4.36885	F	rs13475726	1	12.2105	1422432_at	1	121.941	trans	Dbi	diazepam binding inhibitor
3.00526	F	rs13475726	1	12.2105	1424347_at	2	39.0164	trans	Ppp6c	protein phosphatase 6, catalytic subunit
3.3544	F	rs13475726	1	12.2105	1429437_at	2	52.9578	trans	Prpf40a	PRP40 pre-mRNA processing factor 40 homolog A (yeast)
3.07826	F	rs13475726	1	12.2105	1435750_at	2	118.859	trans	Gchfr	GTP cyclohydrolase I feedback regulator
3.63354	F	rs13475726	1	12.2105	1420411_a_at	5	53.0299	trans	Pi4k2b	phosphatidylinositol 4-kinase type 2 beta
3.50411	F	rs13475726	1	12.2105	1416050_a_at	5	125.566	trans	Scarb1	scavenger receptor class B, member 1
4.88585	F	rs13475726	1	12.2105	1422990_at	6	17.4138	trans	Met	met proto-oncogene
3.1936	F	rs13475726	1	12.2105	1456022_at	6	38.6202	trans	Hipk2	homeodomain interacting protein kinase 2
3.34083	F	rs13475726	1	12.2105	1435386_at	6	125.624	trans	Vwf	Von Willebrand factor homolog
3.57553	F	rs13475726	1	12.2105	1450296_at	6	128.575	trans	Klrb1a	killer cell lectin-like receptor subfamily B member 1A
3.18451	F	rs13475726	1	12.2105	1427481_a_at	7	24.6869	trans	Atp1a3	ATPase, Na+/K+ transporting, alpha 3 polypeptide
3.47372	F	rs13475726	1	12.2105	1423449_a_at	7	28.602	trans	Actn4	actinin alpha 4
4.4871	F	rs13475726	1	12.2105	1420911_a_at	7	79.0073	trans	Mfge8	milk fat globule-EGF factor 8 protein
3.05799	F	rs13475726	1	12.2105	1419128_at	7	127.921	trans	Itgax	integrin alpha X
3.62794	F	rs13475726	1	12.2105	1436595_at	8	129.833	trans	Rbm34	RNA binding motif protein 34
4.54642	F	rs13475726	1	12.2105	1418365_at	9	89.8522	trans	Ctsh	cathepsin H
3.21233	F	rs13475726	1	12.2105	1419609_at	9	123.811	trans	Ccr1	chemokine (C-C motif) receptor 1
3.76035	F	rs13475726	1	12.2105	1427683_at	10	66.9332	trans	Egr2	early growth response 2
3.98049	F	rs13475726	1	12.2105	1438266_at	10	79.7429	trans	Adamtsl5	ADAMTS-like 5
3.46978	F	rs13475726	1	12.2105	1420336_at	10	79.7459	trans	Adamtsl5	ADAMTS-like 5
3.51387	F	rs13475726	1	12.2105	1438464_at	12	71.9658	trans	Arid4a	AT rich interactive domain 4A (Rbp1 like)
3.95174	F	rs13475726	1	12.2105	1449065_at	12	84.8992	trans	Acot1	acyl-CoA thioesterase 1
4.02419	F	rs13475726	1	12.2105	1422668_at	13	33.0349	trans	Serpinb9b	serine (or cysteine) peptidase inhibitor, clade B, member 9b
3.23144	F	rs13475726	1	12.2105	1429183_at	16	16.1269	trans	Pkp2	plakophilin 2
7.06072	F	rs13475726	1	12.2105	1428535_at	18	4.68138	trans	9430020K01Rik	RIKEN cDNA 9430020K01 gene
4.32168	F	rs13475728	1	12.8349	1444506_at	ambig	ambig	ambig	Tram1	Translocating chain-associating membrane protein 1
3.2683	F	rs13475728	1	12.8349	1417374_at	1	75.0974	trans	Tuba4	tubulin, alpha 4
3.23534	F	rs13475728	1	12.8349	1443931_at	8	74.845	trans	Ccnb2-ps	Cyclin B2, pseudogene
3.09751	F	rs13475728	1	12.8349	1427513_at	8	117.039	trans	BC024137	cDNA sequence BC024137
3.10491	F	rs13475728	1	12.8349	1459622_at	8	125.158	trans	Gm22	gene model 22, (NCBI)
3.12404	F	rs13475728	1	12.8349	1452667_at	14	51.1837	trans	Rab2b	RAB2B, member RAS oncogene family
3.45613	F	rs13475728	1	12.8349	1426939_at	X	146.43	trans	Tsr2	TSR2, 20S rRNA accumulation, homolog (S. cerevisiae)
3.69664	F	rs13475728	1	12.8349	1435234_at	1	13.1243	cis	Ncoa2	nuclear receptor coactivator 2
4.33723	F	rs13475729	1	12.9959	1455976_x_at	ambig	ambig	ambig	Dbi	diazepam binding inhibitor
3.12797	F	rs13475729	1	12.9959	1422186_s_at	15	82.9813	trans	Cyb5r3	cytochrome b5 reductase 3
4.50265	F	rs13475731	1	13.5454	1424463_at	1	52.6008	trans	2210010L05Rik	RIKEN cDNA 2210010L05 gene
3.19772	F	rs13475731	1	13.5454	1417953_at	6	22.2565	trans	D6Wsu176e	DNA segment, Chr 6, Wayne State University 176, expressed
4.26197	F	rs13475731	1	13.5454	1433902_at	6	95.094	trans	Kbtbd8	kelch repeat and BTB (POZ) domain containing 8
4.00427	F	rs13475731	1	13.5454	1420265_x_at	8	109.938	trans	Cog8	component of oligomeric golgi complex 8
3.14493	F	rs13475731	1	13.5454	1452583_s_at	17	80.0358	trans	Galm	galactose mutarotase
3.16076	F	c1.loc10	1	13.7612	1455968_x_at	5	124.811	trans	Tmed2	transmembrane emp24 domain trafficking protein 2
3.76467	F	c1.loc10	1	13.7612	1453474_at	11	77.3313	trans	1300007F04Rik	RIKEN cDNA 1300007F04 gene
5.65015	F	c1.loc14	1	17.7612	1423732_at	1	13.5499	cis	Tram1	translocating chain-associating membrane protein 1
3.0559	F	rs13475749	1	19.3699	1455617_at	ambig	ambig	ambig	Lmbrd1	LMBR1 domain containing 1
3.17577	F	rs13475749	1	19.3699	1440180_x_at	19	8.87161	trans	Zbtb3	zinc finger and BTB domain containing 3
3.2352	F	rs13475750	1	19.6194	1417480_at	9	77.8672	trans	Fbxo9	f-box only protein 9
3.04206	F	c1.loc18	1	21.7612	1430474_a_at	2	90.6481	trans	Mtch2	mitochondrial carrier homolog 2 (C. elegans)
3.28544	F	c1.loc18	1	21.7612	1460648_at	8	74.3028	trans	Nr2f6	nuclear receptor subfamily 2, group F, member 6
3.4092	F	c1.loc18	1	21.7612	1449915_at	9	39.9429	trans	Zfp202	zinc finger protein 202
3.92313	F	c1.loc18	1	21.7612	1451265_at	1	34.3812	cis	Ccdc115	coiled-coil domain containing 115
3.30341	F	c1.loc20	1	23.7612	1419369_at	18	21.1443	trans	Rnf138	ring finger protein 138
3.48756	F	rs13475765	1	23.988	1424403_a_at	5	89.6581	trans	Rufy3	RUN and FYVE domain containing 3
3.07678	F	rs13475765	1	23.988	1449346_s_at	13	38.0506	trans	Riok1	RIO kinase 1 (yeast)
3.55891	F	rs13475769	1	25.0772	1451048_at	10	93.2904	trans	Metap2	methionine aminopeptidase 2
6.87095	F	rs13475769	1	25.0772	1418380_at	1	15.7909	cis	Terf1	telomeric repeat binding factor 1
10.8446	F	rs13475769	1	25.0772	1424413_at	1	23.3207	cis	Ogfrl1	opioid growth factor receptor-like 1
21.8531	F	rs13475769	1	25.0772	1424412_at	1	23.3207	cis	Ogfrl1	opioid growth factor receptor-like 1
17.2906	F	rs13475769	1	25.0772	1453122_at	1	23.965	cis	4921533L14Rik	RIKEN cDNA 4921533L14 gene
5.36135	F	rs13475769	1	25.0772	1435475_at	1	36.3677	cis	Lman2l	lectin, mannose-binding 2-like
3.86982	F	rs13475784	1	28.8361	1448411_at	5	37.2544	trans	Wfs1	Wolfram syndrome 1 homolog (human)
4.99687	F	rs13475784	1	28.8361	1424414_at	1	23.3207	cis	Ogfrl1 /// LOC673882	opioid growth factor receptor-like 1 /// similar to opioid growth factor receptor-like 1
3.20027	F	rs13475788	1	30.1156	1458562_at	ambig	ambig	ambig	---	---
3.83232	F	rs13475788	1	30.1156	1417597_at	1	60.691	trans	Cd28	CD28 antigen
3.49084	F	rs13475788	1	30.1156	1436011_at	2	164.979	trans	Elmo2	engulfment and cell motility 2, ced-12 homolog (C. elegans)
3.52424	F	rs13475789	1	30.3699	1442027_at	1	60.2727	trans	Nbeal1	neurobeachin like 1
3.26758	F	rs13475795	1	33.1829	1456350_at	1	33.7385	cis	Zfp451	zinc finger protein 451
3.0395	F	rs3022778	1	36.3988	1424097_at	13	109.335	trans	Elovl7	ELOVL family member 7, elongation of long chain fatty acids (yeast)
5.15551	F	rs3022778	1	36.3988	1426806_at	1	51.414	cis	5830411E10Rik	RIKEN cDNA 5830411E10 gene
8.98526	F	rs6255606	1	38.0386	1426355_a_at	ambig	ambig	ambig	6330578E17Rik	RIKEN cDNA 6330578E17 gene
3.29242	F	rs6255606	1	38.0386	1427055_at	3	94.4028	trans	Them4	thioesterase superfamily member 4
3.44716	F	rs6387241	1	39.9876	1426664_x_at	1	133.805	trans	Slc45a3	solute carrier family 45, member 3
3.38103	F	rs6387241	1	39.9876	1429410_at	15	44.2582	trans	Eny2	enhancer of yellow 2 homolog (Drosophila)
4.46571	F	rs6387241	1	39.9876	1444003_at	1	36.2135	cis	Lincr	lung-inducible neuralized-related C3HC4 RING domain protein
3.52332	F	rs6387241	1	39.9876	1421360_at	1	37.2445	cis	Inpp4a	inositol polyphosphate-4-phosphatase, type I
4.93706	F	rs6387241	1	39.9876	1424002_at	1	38.9324	cis	Pdcl3	phosducin-like 3
3.10835	F	rs13475824	1	40.9688	1440688_at	ambig	ambig	ambig	Arhgap26	Rho GTPase activating protein 26
4.90092	F	rs13475824	1	40.9688	1428425_at	1	42.9918	cis	Tgfbrap1	transforming growth factor, beta receptor associated protein 1
3.11834	F	rs13475826	1	41.2743	1449714_at	2	30.207	trans	5730472N09Rik	RIKEN cDNA 5730472N09 gene
3.25574	F	rs13475827	1	41.6268	1434453_at	14	23.281	trans	Polr3a	polymerase (RNA) III (DNA directed) polypeptide A
3.37269	F	rs13475827	1	41.6268	1425907_s_at	X	140.696	trans	Amot	angiomotin
3.54925	F	c1.loc38	1	41.7612	1418036_at	1	33.3984	cis	Prim2	DNA primase, p58 subunit
3.93275	F	rs13475831	1	42.5969	1434266_at	5	20.993	trans	AI847670	expressed sequence AI847670
4.40875	F	rs13475831	1	42.5969	1429127_at	9	110.466	trans	Nradd	neurotrophin receptor associated death domain
3.01414	F	rs13475831	1	42.5969	1456059_at	11	80.2876	trans	Psmd11	proteasome (prosome, macropain) 26S subunit, non-ATPase, 11
3.7911	F	rs13475831	1	42.5969	1456089_at	13	105.323	trans	Trim23	tripartite motif protein 23
3.28463	F	rs13475831	1	42.5969	1420820_at	17	70.8985	trans	2900073G15Rik	RIKEN cDNA 2900073G15 gene
3.0319	F	rs13475831	1	42.5969	1441380_at	18	12.8813	trans	2810439F02Rik	RIKEN cDNA 2810439F02 gene
3.241	F	rs13475831	1	42.5969	1435235_at	18	63.788	trans	Txnl1	thioredoxin-like 1
4.87647	F	rs13475831	1	42.5969	1425186_at	1	24.6329	cis	Lmbrd1	LMBR1 domain containing 1
9.44199	F	rs13475831	1	42.5969	1417293_at	1	36.0125	cis	Hs6st1	heparan sulfate 6-O-sulfotransferase 1
6.93198	F	rs13475831	1	42.5969	1417624_at	1	52.4018	cis	Nab1	Ngfi-A binding protein 1
3.02306	F	c1.loc40	1	43.7612	1455820_x_at	ambig	ambig	ambig	Scarb1	scavenger receptor class B, member 1
4.22461	F	rs13475840	1	44.9905	1430623_s_at	ambig	ambig	ambig	5830411E10Rik	RIKEN cDNA 5830411E10 gene
3.37604	F	rs13475840	1	44.9905	1434718_at	1	80.1439	trans	Cul3	cullin 3
3.05963	F	rs13475840	1	44.9905	1448629_at	5	112.583	trans	Hps4	Hermansky-Pudlak syndrome 4 homolog (human)
3.10102	F	rs13475840	1	44.9905	1435376_at	8	27.1909	trans	Ddhd2	DDHD domain containing 2
3.8012	F	rs13475840	1	44.9905	1449153_at	9	7.34742	trans	Mmp12	matrix metallopeptidase 12
3.429	F	rs13475840	1	44.9905	1452005_at	9	50.3869	trans	Dlat	dihydrolipoamide S-acetyltransferase (E2 component of pyruvate dehydrogenase complex)
3.223	F	rs13475840	1	44.9905	1437111_at	9	51.8616	trans	Zc3h12c	zinc finger CCCH type containing 12C
3.93415	F	rs13475840	1	44.9905	1426999_at	12	99.16	trans	Zc3h14	zinc finger CCCH type containing 14
3.23754	F	rs13475840	1	44.9905	1435737_a_at	16	14.1019	trans	Nde1	nuclear distribution gene E homolog 1 (A nidulans)
3.07461	F	rs13475840	1	44.9905	1453152_at	19	23.3697	trans	Mamdc2	MAM domain containing 2
7.58395	F	rs13475840	1	44.9905	1426620_at	1	38.8084	cis	Chst10	carbohydrate sulfotransferase 10
3.10295	F	rs13475840	1	44.9905	1428426_s_at	1	42.9918	cis	Tgfbrap1	transforming growth factor, beta receptor associated protein 1
8.15977	F	rs13475840	1	44.9905	1416796_at	1	43.3904	cis	Nck2	non-catalytic region of tyrosine kinase adaptor protein 2
5.00717	F	rs13475840	1	44.9905	1452203_at	1	51.414	cis	5830411E10Rik	RIKEN cDNA 5830411E10 gene
3.17169	F	c1.loc42	1	45.7612	1451867_x_at	X	164.14	trans	Arhgap6	Rho GTPase activating protein 6
8.01889	F	c1.loc42	1	45.7612	1448921_a_at	1	42.7958	cis	Mrps9	mitochondrial ribosomal protein S9
3.57155	F	rs13475846	1	46.5457	1451447_at	11	87.9858	trans	Cuedc1	CUE domain containing 1
3.42446	F	c1.loc48	1	51.7612	1449590_a_at	9	99.1971	trans	Mras	muscle and microspikes RAS
3.05567	F	rs13475863	1	51.8795	1430069_at	ambig	ambig	ambig	4921517L17Rik	RIKEN cDNA 4921517L17 gene
3.39231	F	rs13475863	1	51.8795	1426233_at	11	65.5044	trans	Map2k4	mitogen activated protein kinase kinase 4
4.5109	F	rs13475863	1	51.8795	1454765_at	1	54.3415	cis	Gtf3c3	general transcription factor IIIC, polypeptide 3
3.92384	F	rs13475867	1	52.7437	1422855_at	12	21.5328	trans	Cpsf3	cleavage and polyadenylation specificity factor 3
3.80491	F	c1.loc50	1	53.7612	1437025_at	ambig	ambig	ambig	Cd28	CD28 antigen
7.69687	F	c1.loc50	1	53.7612	1451512_s_at	1	52.7896	cis	Hibch	3-hydroxyisobutyryl-Coenzyme A hydrolase
3.09225	F	c1.loc52	1	55.7612	1424022_at	8	122.323	trans	1700012B18Rik	RIKEN cDNA 1700012B18 gene
9.03324	F	c1.loc52	1	55.7612	1434422_at	1	57.3291	cis	---	---
3.37197	F	rs3022801	1	58.3585	1444106_at	ambig	ambig	ambig	D330012F22Rik	RIKEN cDNA D330012F22 gene
3.78974	F	rs3022801	1	58.3585	1438657_x_at	ambig	ambig	ambig	Ptp4a1 /// LOC433406 /// LOC627166 /// LOC627200 /// LOC667723	protein tyrosine phosphatase 4a1 /// protein tyrosine phosphatase 4a1-like /// protein tyrosine phosphatase 4a1 pseudogene /// protein tyrosine phosphatase 4a1-like /// similar to protein tyrosine phosphatase 4a1
3.20466	F	rs3022801	1	58.3585	1460521_a_at	1	51.4157	cis	5830411E10Rik	RIKEN cDNA 5830411E10 gene
3.91315	F	rs3022801	1	58.3585	1450997_at	1	53.7001	cis	Stk17b	serine/threonine kinase 17b (apoptosis-inducing)
4.49686	F	rs3022801	1	58.3585	1436317_at	1	54.4195	cis	D230012E17Rik	RIKEN cDNA D230012E17 gene
8.09685	F	rs3022801	1	58.3585	1422579_at	1	55.0327	cis	Hspe1 /// LOC628438 /// LOC636088	heat shock protein 1 (chaperonin 10) /// similar to 10 kDa heat shock protein, mitochondrial (Hsp10) (10 kDa chaperonin) (CPN10) /// similar to 10 kDa heat shock protein, mitochondrial (Hsp10) (10 kDa chaperonin) (CPN10)
3.49609	F	c1.loc56	1	59.7612	1424161_at	2	166.709	trans	Ddx27	DEAD (Asp-Glu-Ala-Asp) box polypeptide 27
3.91289	F	c1.loc56	1	59.7612	1433903_at	12	58.1588	trans	AU021838	expressed sequence AU021838
3.81998	F	c1.loc56	1	59.7612	1436727_x_at	13	53.3402	trans	Sptlc1	serine palmitoyltransferase, long chain base subunit 1
4.12606	F	c1.loc56	1	59.7612	1423452_at	1	53.7001	cis	Stk17b	serine/threonine kinase 17b (apoptosis-inducing)
7.78554	F	c1.loc56	1	59.7612	1418561_at	1	54.9297	cis	Sf3b1	splicing factor 3b, subunit 1
6.49177	F	c1.loc56	1	59.7612	1416931_at	1	58.3897	cis	Nif3l1	Ngg1 interacting factor 3-like 1 (S. pombe)
25.0021	F	c1.loc56	1	59.7612	1435661_at	1	59.0451	cis	Als2cr4	amyotrophic lateral sclerosis 2 (juvenile) chromosome region, candidate 4
16.9468	F	c1.loc56	1	59.7612	1434303_at	1	60.4279	cis	Raph1	Ras association (RalGDS/AF-6) and pleckstrin homology domains 1
6.22816	F	c1.loc56	1	59.7612	1437917_at	1	64.0484	cis	D530037H12Rik	RIKEN cDNA D530037H12 gene
9.9387	F	rs13475883	1	60.9123	1418034_at	1	42.7958	cis	Mrps9	mitochondrial ribosomal protein S9
3.21462	F	c1.loc58	1	61.7612	1455735_at	1	79.4856	cis	Ap1s3	adaptor-related protein complex AP-1, sigma 3
3.94719	F	rs13475885	1	62.2441	1423956_at	1	23.7999	trans	Smap1	stromal membrane-associated protein 1
6.17628	F	rs13475885	1	62.2441	1417270_at	1	60.0214	cis	Wdr12	WD repeat domain 12
6.55573	F	rs13475885	1	62.2441	1436984_at	1	60.4229	cis	Abi2	abl-interactor 2
8.97812	F	rs13475885	1	62.2441	1433985_at	1	60.4243	cis	Abi2	abl-interactor 2
9.96081	F	c1.loc62	1	65.7612	1449274_at	1	64.5407	cis	2310038H17Rik	RIKEN cDNA 2310038H17 gene
33.2256	F	c1.loc64	1	67.7612	1452994_at	1	65.2097	cis	Pip5k3	phosphatidylinositol-3-phosphate/phosphatidylinositol 5-kinase, type III
7.2332	F	c1.loc64	1	67.7612	1431792_a_at	1	75.4047	cis	Stk11ip	serine/threonine kinase 11 interacting protein
5.40351	F	rs13475906	1	69.1558	1424783_a_at	1	89.9019	trans	Ugt1a2 /// Ugt1a6a /// Ugt1a10 /// Ugt1a7c /// Ugt1a5 /// Ugt1a9 /// Ugt1a6b /// Ugt1a1	UDP glucuronosyltransferase 1 family, polypeptide A2 /// UDP glucuronosyltransferase 1 family, polypeptide A6A /// UDP glycosyltransferase 1 family, polypeptide A10 /// UDP glucuronosyltransferase 1 family, polypeptide A7C /// UDP glucuronosyltransferase 1 family, polypeptide A5 /// UDP glucuronosyltransferase 1 family, polypeptide A9 /// UDP glucuronosyltransferase 1 family, polypeptide A6B /// …
3.98616	F	rs13475906	1	69.1558	1426260_a_at	1	89.9696	trans	Ugt1a2 /// Ugt1a6a /// Ugt1a10 /// Ugt1a7c /// Ugt1a5 /// Ugt1a9 /// Ugt1a6b /// Ugt1a1	UDP glucuronosyltransferase 1 family, polypeptide A2 /// UDP glucuronosyltransferase 1 family, polypeptide A6A /// UDP glycosyltransferase 1 family, polypeptide A10 /// UDP glucuronosyltransferase 1 family, polypeptide A7C /// UDP glucuronosyltransferase 1 family, polypeptide A5 /// UDP glucuronosyltransferase 1 family, polypeptide A9 /// UDP glucuronosyltransferase 1 family, polypeptide A6B /// …
3.10131	F	rs13475906	1	69.1558	1447864_s_at	1	168.232	trans	Pogk	pogo transposable element with KRAB domain
3.41823	F	rs13475906	1	69.1558	1420679_a_at	10	13.3426	trans	Aig1	androgen-induced 1
3.60473	F	rs13475906	1	69.1558	1458389_at	1	64.0419	cis	Klf7	Kruppel-like factor 7 (ubiquitous)
7.58889	F	rs13475906	1	69.1558	1419821_s_at	1	65.0931	cis	Idh1	isocitrate dehydrogenase 1 (NADP+), soluble
9.36148	F	rs13475906	1	69.1558	1422994_at	1	65.121	cis	Pip5k3	phosphatidylinositol-3-phosphate/phosphatidylinositol 5-kinase, type III
3.29483	F	c1.loc66	1	69.7612	1434625_at	ambig	ambig	ambig	4930432O21Rik	RIKEN cDNA 4930432O21 gene
3.81342	F	c1.loc68	1	71.7612	1455448_at	19	10.3123	trans	Nt5dc3	5'-nucleotidase domain containing 3
3.60405	F	rs13475914	1	73.1975	1419557_a_at	1	137.825	trans	Tmem9	transmembrane protein 9
3.06168	F	rs13475914	1	73.1975	1419469_at	3	32.7751	trans	Gnb4	guanine nucleotide binding protein, beta 4
3.34634	F	rs13475914	1	73.1975	1436541_at	7	118.634	trans	2310008H09Rik	RIKEN cDNA 2310008H09 gene
3.88412	F	rs13475914	1	73.1975	1450420_at	9	100.453	trans	Stag1	stromal antigen 1
3.07727	F	rs13475914	1	73.1975	1438197_at	10	93.3995	trans	Vezt	vezatin, adherens junctions transmembrane protein
3.14991	F	rs13475914	1	73.1975	1449932_at	11	120.778	trans	Csnk1d	casein kinase 1, delta
3.07949	F	rs6191076	1	73.5229	1419470_at	3	32.7751	trans	Gnb4	guanine nucleotide binding protein, beta 4
3.04413	F	rs6191076	1	73.5229	1455759_a_at	18	36.7745	trans	Ankhd1	ankyrin repeat and KH domain containing 1
3.40121	F	rs6191076	1	73.5229	1456681_at	X	150.91	trans	AI848149	expressed sequence AI848149
5.63882	F	rs6191076	1	73.5229	1423402_at	1	64.4671	cis	Creb1	cAMP responsive element binding protein 1
4.63516	F	rs6191076	1	73.5229	1417578_a_at	1	75.3191	cis	Gmppa	GDP-mannose pyrophosphorylase A
5.85454	F	rs6191076	1	73.5229	1417671_at	1	93.1288	cis	Scly	selenocysteine lyase
3.00029	F	rs4222426	1	73.9888	1416684_at	17	6.07758	trans	Fbl	fibrillarin
3.16057	F	rs6405821	1	76.8402	1444175_at	ambig	ambig	ambig	Arfgef1	ADP-ribosylation factor guanine nucleotide-exchange factor 1(brefeldin A-inhibited)
5.7515	F	rs6405821	1	76.8402	1455331_at	ambig	ambig	ambig	9430067K14Rik	RIKEN cDNA 9430067K14 gene
3.08354	F	rs6405821	1	76.8402	1424086_at	9	42.9729	trans	D9Ucla1	DNA segment, Chr 9, University of California at Los Angeles 1
3.36915	F	rs6405821	1	76.8402	1454837_at	9	62.6368	trans	Cln6	ceroid-lipofuscinosis, neuronal 6
3.21511	F	rs6405821	1	76.8402	1435167_at	19	29.8741	trans	Ranbp6	RAN binding protein 6
6.9923	F	rs6405821	1	76.8402	1429627_at	1	58.3755	cis	Ppil3	peptidylprolyl isomerase (cyclophilin)-like 3
8.64258	F	rs6405821	1	76.8402	1418225_at	1	58.4073	cis	Orc2l	origin recognition complex, subunit 2-like (S. cerevisiae)
9.91442	F	rs6405821	1	76.8402	1456257_at	1	58.4692	cis	C130065N10Rik	RIKEN cDNA C130065N10 gene
4.07976	F	rs6405821	1	76.8402	1436229_at	1	58.4707	cis	BC049806	CDNA sequence BC049806
7.60501	F	rs6405821	1	76.8402	1456320_at	1	58.4719	cis	BC049806	cDNA sequence BC049806
5.50642	F	rs6405821	1	76.8402	1428506_at	1	71.4904	cis	Atic	5-aminoimidazole-4-carboxamide ribonucleotide formyltransferase/IMP cyclohydrolase
20.7044	F	rs6405821	1	76.8402	1459048_s_at	1	74.4997	cis	Zfp142	zinc finger protein 142
8.15568	F	rs6405821	1	76.8402	1435980_x_at	1	74.7179	cis	Wnt6	wingless-related MMTV integration site 6
3.4817	F	rs6405821	1	76.8402	1416127_a_at	1	75.1917	cis	Dnpep	aspartyl aminopeptidase
3.38203	F	c1.loc76	1	79.7612	1418474_at	14	54.5356	trans	1500005A01Rik	RIKEN cDNA 1500005A01 gene
3.20358	F	rs4222476	1	80.1627	1439880_at	1	65.0416	cis	D630023F18Rik	RIKEN cDNA D630023F18 gene
3.04446	F	rs13475939	1	80.4701	1436404_at	11	77.9977	trans	Tlcd1	TLC domain containing 1
4.41372	F	rs13475939	1	80.4701	1421929_at	1	77.2523	cis	Epha4	Eph receptor A4
4.41827	F	rs13475939	1	80.4701	1430986_at	1	78.3011	cis	Farslb	phenylalanine-tRNA synthetase-like, beta subunit
6.3079	F	rs13475956	1	85.4265	1448657_a_at	1	75.1197	cis	Dnajb10	DnaJ (Hsp40) homolog, subfamily B, member 10
3.00337	F	rs13475967	1	89.3946	1415782_at	ambig	ambig	ambig	Sumo2	SMT3 suppressor of mif two 3 homolog 2 (yeast)
8.0522	F	rs13475967	1	89.3946	1429563_x_at	ambig	ambig	ambig	5031415C07Rik	RIKEN cDNA 5031415C07 gene
12.1746	F	rs13475967	1	89.3946	1460084_at	ambig	ambig	ambig	---	---
12.3753	F	rs13475967	1	89.3946	1435792_at	ambig	ambig	ambig	Csprs /// LOC665338	component of Sp100-rs /// similar to component of Sp100-rs
3.22436	F	rs13475967	1	89.3946	1433994_at	7	33.9454	trans	4931406P16Rik	RIKEN cDNA 4931406P16 gene
3.11551	F	rs13475967	1	89.3946	1416382_at	7	88.1533	trans	Ctsc	cathepsin C
4.94082	F	rs13475967	1	89.3946	1425001_at	10	29.0335	trans	Rnf146	ring finger protein 146
3.35172	F	rs13475967	1	89.3946	1416958_at	14	16.9971	trans	Nr1d2	nuclear receptor subfamily 1, group D, member 2
3.9854	F	rs13475967	1	89.3946	1447084_at	18	80.8095	trans	Nfatc1	nuclear factor of activated T-cells, cytoplasmic, calcineurin-dependent 1
19.2845	F	rs13475967	1	89.3946	1456635_at	1	84.9904	cis	---	---
19.2375	F	rs13475967	1	89.3946	1422140_at	1	85.0812	cis	Sp100-rs /// LOC620113 /// LOC665338 /// LOC665378 /// LOC673083 /// LOC673135 /// LOC673206 /// LOC673671 /// LOC673849 /// LOC673997	similar to component of Sp100-rs /// similar to component of Sp100-rs /// similar to component of Sp100-rs /// similar to component of Sp100-rs /// similar to component of Sp100-rs /// similar to component of Sp100-rs /// similar to component of Sp100-rs /// similar to component of Sp100-rs /// similar to component of Sp100-rs /// similar to component of Sp100-rs
10.8794	F	rs13475967	1	89.3946	1460416_s_at	1	87.2645	cis	Csprs /// Sp100-rs /// LOC665338 /// LOC665378 /// LOC673105 /// LOC673206 /// LOC673671 /// LOC673849 /// LOC673925 /// LOC673997	component of Sp100-rs /// similar to component of Sp100-rs /// similar to component of Sp100-rs /// similar to component of Sp100-rs /// similar to component of Sp100-rs /// similar to component of Sp100-rs /// similar to component of Sp100-rs /// similar to component of Sp100-rs /// similar to component of Sp100-rs /// similar to component of Sp100-rs
18.6514	F	rs13475967	1	89.3946	1440214_at	1	87.5483	cis	A630001G21Rik	RIKEN cDNA A630001G21 gene
3.53088	F	rs13475967	1	89.3946	1418720_at	1	88.4141	cis	Cops7b	COP9 (constitutive photomorphogenic) homolog, subunit 7b (Arabidopsis thaliana)
12.1216	F	c1.loc86	1	89.7612	1422141_s_at	1	85.0812	cis	Csprs	component of Sp100-rs
4.03703	F	c1.loc86	1	89.7612	1436758_at	1	93.7623	cis	Hdac4	histone deacetylase 4
4.06062	F	rs13475973	1	91.4212	1427832_at	ambig	ambig	ambig	Tuba-rs1	tubulin alpha, related sequence 1
3.05481	F	rs13475973	1	91.4212	1420960_at	4	43.0234	trans	Fancg	Fanconi anemia, complementation group G
3.44926	F	rs13475973	1	91.4212	1453230_at	7	29.6415	trans	Zfp74	zinc finger protein 74
3.73543	F	rs13475973	1	91.4212	1419091_a_at	9	69.2528	trans	Anxa2	annexin A2
3.13277	F	rs13475973	1	91.4212	1418127_a_at	X	44.7196	trans	Pdcd8	programmed cell death 8
10.7649	F	rs13475973	1	91.4212	1422178_a_at	1	92.7885	cis	Rab17	RAB17, member RAS oncogene family
7.62171	F	rs13475973	1	91.4212	1421284_at	1	107.349	cis	Pign	phosphatidylinositol glycan anchor biosynthesis, class N
3.38224	F	c1.loc88	1	91.7612	1415864_at	6	34.4065	trans	Bpgm	2,3-bisphosphoglycerate mutase
3.21664	F	c1.loc88	1	91.7612	1457678_at	1	107.564	cis	2310035C23Rik	RIKEN cDNA 2310035C23 gene
3.04904	F	rs13475982	1	94.0599	1448057_at	ambig	ambig	ambig	---	---
3.25468	F	rs13475982	1	94.0599	1439138_at	1	107.518	cis	2310035C23Rik	RIKEN cDNA 2310035C23 gene
3.04304	F	rs13475984	1	94.6584	1433935_at	ambig	ambig	ambig	AU020206	expressed sequence AU020206
8.82149	F	rs13475984	1	94.6584	1429021_at	1	77.2502	cis	Epha4	Eph receptor A4
5.43237	F	rs13475984	1	94.6584	1421928_at	1	77.2523	cis	Epha4	Eph receptor A4
3.80411	F	rs8239527	1	95.0244	1428169_at	1	89.5872	cis	Atg16l1	autophagy-related 16-like 1 (yeast)
3.14879	F	rs13475991	1	96.3378	1424239_at	8	108.509	trans	2310066E14Rik	RIKEN cDNA 2310066E14 gene
13.0652	F	rs13475991	1	96.3378	1447754_x_at	1	95.5358	cis	Thap4	THAP domain containing 4
4.8809	F	c1.loc96	1	99.7612	1460594_a_at	1	75.3257	trans	Gmppa	GDP-mannose pyrophosphorylase A
3.12128	F	c1.loc96	1	99.7612	1434200_at	14	59.1781	trans	BC010981	cDNA sequence BC010981
3.59237	F	rs6178486	1	103.616	1415982_at	9	24.8585	trans	Herpud2	HERPUD family member 2
3.27281	F	rs6178486	1	103.616	1421122_at	12	32.0724	trans	Cbll1	Casitas B-lineage lymphoma-like 1
6.53973	F	rs6178486	1	103.616	1458882_at	1	109.435	cis	Serpinb8	serine (or cysteine) peptdiase inhibitor, clade B, member 8
3.13861	F	rs13476036	1	109.207	1427348_at	4	124.621	trans	Zc3h12a	zinc finger CCCH type containing 12A
3.44437	F	rs13476036	1	109.207	1455390_at	7	30.0175	trans	1500005P14Rik /// Alkbh6	RIKEN cDNA 1500005P14 gene /// alkB, alkylation repair homolog 6 (E. coli)
3.7347	F	rs13476036	1	109.207	1424436_at	16	91.5223	trans	Gart	phosphoribosylglycinamide formyltransferase
22.2658	F	rs13476036	1	109.207	1435262_at	1	107.346	cis	---	Transcribed locus
17.0679	F	rs13476036	1	109.207	1441293_at	1	107.815	cis	---	Adult male accessory axillary lymph node cDNA, RIKEN full-length enriched library, clone:G630004G16 product:unclassifiable, full insert sequence
16.2491	F	c1.loc114	1	117.761	1437840_s_at	1	95.6824	trans	LOC673662	similar to CG3835-PA, isoform A
4.30395	F	rs6259837	1	119.997	1433856_at	1	99.5364	trans	Hisppd1	histidine acid phosphatase domain containing 1
3.07001	F	rs6259837	1	119.997	1435290_x_at	17	33.8911	trans	H2-Aa	histocompatibility 2, class II antigen A, alpha
3.67784	F	rs13476076	1	121.149	1456582_x_at	ambig	ambig	ambig	5230400G24Rik /// LOC637796	RIKEN cDNA 5230400G24 gene /// hypothetical protein LOC637796
4.70675	F	rs13476076	1	121.149	1452238_at	1	82.7185	trans	Hrb	HIV-1 Rev binding protein
9.09977	F	c1.loc118	1	121.761	1448516_at	1	120.126	cis	Tsn	translin
28.8692	F	c1.loc120	1	123.761	1418908_at	1	99.6513	trans	Pam	peptidylglycine alpha-amidating monooxygenase
6.85686	F	c1.loc120	1	123.761	1432115_a_at	1	107.474	cis	Pign	phosphatidylinositol glycan anchor biosynthesis, class N
4.8346	F	c1.loc120	1	123.761	1416908_s_at	1	120.126	cis	Tsn	translin
3.14196	F	c1.loc122	1	125.761	1429715_at	14	65.9683	trans	Ppp2r2a	protein phosphatase 2 (formerly 2A), regulatory subunit B (PR 52), alpha isoform
6.1207	F	c1.loc124	1	127.761	1457067_at	ambig	ambig	ambig	Vps4b	Vacuolar protein sorting 4b (yeast)
13.0612	F	c1.loc124	1	127.761	1429728_at	1	99.6006	trans	4930429M06Rik	RIKEN cDNA 4930429M06Rik
3.04944	F	c1.loc126	1	129.761	1421160_a_at	11	120.598	trans	Rfng	radical fringe gene homolog (Drosophila)
6.91854	F	rs13476106	1	131.655	1435901_at	1	89.7763	trans	Usp40	ubiquitin specific peptidase 40
3.62492	F	rs13476106	1	131.655	1422136_at	1	172.036	trans	Uhmk1 /// LOC677213	U2AF homology motif (UHM) kinase 1 /// similar to U2AF homology motif (UHM) kinase 1
4.07373	F	rs13476106	1	131.655	1442671_at	5	65.857	trans	Hip2	Huntingtin interacting protein 2
3.00668	F	rs13476106	1	131.655	1431144_at	5	112.577	trans	2810002G02Rik /// LOC671202	RIKEN cDNA 2810002G02 gene /// region containing RIKEN cDNA 2810002G02 gene; tuftelin interacting protein 11
3.3025	F	rs13476125	1	139.04	1436567_a_at	ambig	ambig	ambig	Ndufa7	NADH dehydrogenase (ubiquinone) 1 alpha subcomplex, 7 (B14.5a)
3.39239	F	rs13476125	1	139.04	1422101_at	ambig	ambig	ambig	Tnfrsf23	tumor necrosis factor receptor superfamily, member 23
4.64665	F	rs13476125	1	139.04	1427430_at	1	163.657	trans	AI848100	expressed sequence AI848100
3.94559	F	rs13476125	1	139.04	1448857_a_at	2	29.9129	trans	Zdhhc12	zinc finger, DHHC domain containing 12
3.49674	F	rs13476125	1	139.04	1435133_at	4	59.3151	trans	Ugcg	UDP-glucose ceramide glucosyltransferase
3.12708	F	rs13476125	1	139.04	1452617_at	6	40.4011	trans	Ssbp1	single-stranded DNA binding protein 1
3.04449	F	rs13476125	1	139.04	1419527_at	8	73.3025	trans	Comp	cartilage oligomeric matrix protein
3.02349	F	rs13476125	1	139.04	1427065_at	11	60.2339	trans	4933439F18Rik	RIKEN cDNA 4933439F18 gene
3.39784	F	rs13476125	1	139.04	1439360_x_at	17	17.6155	trans	D15Ertd785e /// LOC665187 /// LOC670255	DNA segment, Chr 15, ERATO Doi 785, expressed /// similar to kleisin beta isoform 2 /// similar to kleisin beta isoform 2
3.27987	F	rs13476125	1	139.04	1435009_at	X	52.9851	trans	Slc9a6	solute carrier family 9 (sodium/hydrogen exchanger), isoform 6
3.05196	F	rs13476125	1	139.04	1425718_a_at	1	153.112	cis	Ivns1abp	influenza virus NS1A binding protein
4.04494	F	rs13476125	1	139.04	1444235_at	1	153.647	cis	1700025G04Rik	RIKEN cDNA 1700025G04 gene
3.84933	F	c1.loc136	1	139.761	1427996_at	ambig	ambig	ambig	BC028528	cDNA sequence BC028528
3.04182	F	rs13476129	1	140.101	1435368_a_at	1	182.437	trans	Parp1	poly (ADP-ribose) polymerase family, member 1
3.35977	F	rs13476129	1	140.101	1459121_at	2	18.6842	trans	---	9 days embryo whole body cDNA, RIKEN full-length enriched library, clone:D030030M01 product:unclassifiable, full insert sequence
3.34745	F	rs13476129	1	140.101	1434029_at	5	110.67	trans	2410025L10Rik	RIKEN cDNA 2410025L10 gene
3.01706	F	rs13476129	1	140.101	1436498_at	9	59.1869	trans	Arih1	ariadne ubiquitin-conjugating enzyme E2 binding protein homolog 1 (Drosophila)
3.79169	F	rs13476129	1	140.101	1454849_x_at	14	64.9351	trans	Clu	clusterin
3.42814	F	rs13476129	1	140.101	1434786_at	1	136.571	cis	Ppp1r12b	protein phosphatase 1, regulatory (inhibitor) subunit 12B
8.27057	F	rs13476129	1	140.101	1460333_at	1	138.232	cis	Ddx59	DEAD (Asp-Glu-Ala-Asp) box polypeptide 59
3.11709	F	rs13476130	1	140.469	1429367_at	5	142.919	trans	Wipi2	WD repeat domain, phosphoinositide interacting 2
3.04168	F	rs13476130	1	140.469	1427912_at	16	93.5718	trans	Cbr3	carbonyl reductase 3
3.26361	F	rs13476130	1	140.469	1438230_at	18	46.3605	trans	Pggt1b	protein geranylgeranyltransferase type I, beta subunit
3.22987	F	rs13476130	1	140.469	1449589_x_at	X	33.5582	trans	2610020O08Rik	RIKEN cDNA 2610020O08 gene
8.10035	F	rs13476130	1	140.469	1435772_at	1	137.991	cis	Kif21b	kinesin family member 21B
3.06104	F	rs13476135	1	141.588	1450745_at	6	7.79525	trans	C1galt1	core 1 UDP-galactose:N-acetylgalactosamine-alpha-R beta 1,3-galactosyltransferase
3.13708	F	rs13476135	1	141.588	1430044_at	11	11.3893	trans	4930415F15Rik	RIKEN cDNA 4930415F15 gene
3.01668	F	rs13476135	1	141.588	1426575_at	19	32.1892	trans	Tmem23	transmembrane protein 23
3.1098	F	rs13476137	1	142.2	1440894_at	ambig	ambig	ambig	LOC670793	similar to CG4050-PA, isoform A
3.06205	F	rs13476137	1	142.2	1459896_at	1	168.231	trans	Pogk	pogo transposable element with KRAB domain
3.15466	F	rs13476137	1	142.2	1435748_at	19	21.4584	trans	Gda	guanine deaminase
3.48894	F	rs13476138	1	142.489	1434279_at	ambig	ambig	ambig	Mtm1	X-linked myotubular myopathy gene 1
8.71793	F	c1.loc140	1	143.761	1435052_at	1	166.119	trans	4930455F23Rik	RIKEN cDNA 4930455F23 gene
3.16152	F	c1.loc140	1	143.761	1424043_at	10	7.48308	trans	Ppil4	peptidylprolyl isomerase (cyclophilin)-like 4
3.12305	F	c1.loc142	1	145.761	1456106_x_at	ambig	ambig	ambig	Sdccag3	serologically defined colon cancer antigen 3
3.1474	F	c1.loc142	1	145.761	1428286_at	2	156.08	trans	---	---
4.07983	F	c1.loc142	1	145.761	1451302_at	X	66.6464	trans	1110012L19Rik	RIKEN cDNA 1110012L19 gene
3.20103	F	rs13476152	1	147.278	1437679_a_at	ambig	ambig	ambig	Glrx2	glutaredoxin 2 (thioltransferase)
3.48166	F	rs13476152	1	147.278	1440202_at	ambig	ambig	ambig	LOC622175	similar to gonadotropin inducible ovarian transcription factor 2
4.06625	F	rs13476152	1	147.278	1455061_a_at	ambig	ambig	ambig	Acaa2	acetyl-Coenzyme A acyltransferase 2 (mitochondrial 3-oxoacyl-Coenzyme A thiolase)
23.022	F	rs13476152	1	147.278	1454572_at	ambig	ambig	ambig	2810414N06Rik	RIKEN cDNA 2810414N06 gene
3.8005	F	rs13476152	1	147.278	1416706_at	1	66.6341	trans	Rpe	ribulose-5-phosphate-3-epimerase
3.91571	F	rs13476152	1	147.278	1417136_s_at	5	23.0176	trans	Srpk2	serine/arginine-rich protein specific kinase 2
3.18699	F	rs13476152	1	147.278	1452758_s_at	7	110.861	trans	Eif4g2	eukaryotic translation initiation factor 4, gamma 2
4.6025	F	rs13476152	1	147.278	1421018_at	13	64.3016	trans	1110018J18Rik	RIKEN cDNA 1110018J18 gene
3.77467	F	rs13476152	1	147.278	1450716_at	16	85.6832	trans	Adamts1	a disintegrin-like and metallopeptidase (reprolysin type) with thrombospondin type 1 motif, 1
3.03249	F	rs13476152	1	147.278	1424332_at	17	25.6097	trans	Rab40c	Rab40c, member RAS oncogene family
3.89994	F	rs13476152	1	147.278	1428890_at	18	46.6271	trans	Fem1c	fem-1 homolog c (C.elegans)
4.81194	F	rs13476152	1	147.278	1421899_a_at	1	156.89	cis	Mr1	major histocompatibility complex, class I-related
6.18735	F	rs13476152	1	147.278	1421898_a_at	1	156.89	cis	Mr1	major histocompatibility complex, class I-related
3.23038	F	rs13476152	1	147.278	1451152_a_at	1	166.274	cis	Atp1b1	ATPase, Na+/K+ transporting, beta 1 polypeptide
3.97699	F	rs13476153	1	147.456	1416762_at	3	93.6405	trans	S100a10	S100 calcium binding protein A10 (calpactin)
3.03762	F	rs13476153	1	147.456	1417320_at	5	36.7823	trans	Grpel1	GrpE-like 1, mitochondrial
5.23698	F	rs13476153	1	147.456	1428450_at	7	79.7989	trans	2610034B18Rik	RIKEN cDNA 2610034B18 gene
4.36023	F	rs13476153	1	147.456	1455642_a_at	13	54.8047	trans	Tspan17	tetraspanin 17
6.99956	F	c1.loc146	1	149.761	1456651_a_at	ambig	ambig	ambig	Tpr	translocated promoter region
3.80411	F	c1.loc148	1	151.761	1452341_at	7	139.957	trans	Echs1	enoyl Coenzyme A hydratase, short chain, 1, mitochondrial
40.9571	F	c1.loc148	1	151.761	1426089_a_at	1	152.125	cis	BC003331	cDNA sequence BC003331
4.33608	F	rs4222678	1	153.282	1460707_at	4	129.351	trans	Ptp4a2	protein tyrosine phosphatase 4a2
3.14753	F	rs4222678	1	153.282	1455291_s_at	6	54.8222	trans	Znrf2	zinc and ring finger 2
3.23881	F	rs4222678	1	153.282	1423478_at	7	122.08	trans	Prkcb1	protein kinase C, beta 1
3.92443	F	rs4222678	1	153.282	1434330_at	9	42.1633	trans	Lrrc35	leucine rich repeat containing 35
3.70508	F	rs4222678	1	153.282	1417442_a_at	10	13.2143	trans	Pex3	peroxisomal biogenesis factor 3
3.52914	F	rs4222678	1	153.282	1426456_a_at	18	77.2697	trans	Pias2	protein inhibitor of activated STAT 2
3.33302	F	rs4222678	1	153.282	1426409_at	19	45.0682	trans	Lzts2	leucine zipper, putative tumor suppressor 2
5.07008	F	rs4222678	1	153.282	1422567_at	1	153.334	cis	Niban	niban protein
8.12929	F	rs4222678	1	153.282	1454942_at	1	153.482	cis	Niban	niban protein
3.40697	F	rs4222678	1	153.282	1423885_at	1	154.981	cis	Lamc1	laminin, gamma 1
5.89857	F	rs4222678	1	153.282	1417612_at	1	156.859	cis	Ier5	immediate early response 5
4.64801	F	rs13476178	1	154.191	1456292_a_at	2	13.5004	trans	Vim	vimentin
3.51833	F	rs13476178	1	154.191	1444066_at	2	34.55	trans	Gapvd1	GTPase activating protein and VPS9 domains 1
4.45315	F	rs13476178	1	154.191	1442214_at	4	81.7695	trans	Nfib	Nuclear factor I/B
3.15918	F	rs13476178	1	154.191	1449145_a_at	6	17.2564	trans	Cav1	caveolin, caveolae protein 1
3.02825	F	rs13476178	1	154.191	1434017_at	6	54.7468	trans	---	---
3.04267	F	rs13476178	1	154.191	1420904_at	6	120.429	trans	Il17ra	interleukin 17 receptor A
3.36323	F	rs13476178	1	154.191	1455428_at	7	132.55	trans	A930008G19Rik	RIKEN cDNA A930008G19 gene
3.0544	F	rs13476178	1	154.191	1438597_x_at	9	89.8896	trans	Morf4l1 /// LOC433955 /// LOC627352 /// LOC635663	mortality factor 4 like 1 /// similar to mortality factor 4 like 1 isoform b /// similar to mortality factor 4 like 1 /// similar to mortality factor 4 like 1 (predicted)
3.41582	F	rs13476178	1	154.191	1417970_at	12	70.6436	trans	Atp5s	ATP synthase, H+ transporting, mitochondrial F0 complex, subunit s
4.22009	F	rs13476178	1	154.191	1423881_at	19	3.45493	trans	Saps3	SAPS domain family, member 3
31.5182	F	rs13476178	1	154.191	1434471_at	1	152.124	cis	BC003331	cDNA sequence BC003331
11.1381	F	rs13476178	1	154.191	1456112_at	1	152.155	cis	Tpr	translocated promoter region
11.1973	F	rs13476178	1	154.191	1424873_at	1	153.232	cis	Rnf2	ring finger protein 2
4.16378	F	rs13476178	1	154.191	1426235_a_at	1	155.662	cis	Glul	glutamate-ammonia ligase (glutamine synthetase)
6.78398	F	rs13476178	1	154.191	1426236_a_at	1	155.662	cis	Glul	glutamate-ammonia ligase (glutamine synthetase)
11.3072	F	rs13476178	1	154.191	1460696_at	1	159.295	cis	BC026585	cDNA sequence BC026585
5.84324	F	rs13476178	1	154.191	1418973_at	1	166.128	cis	Blzf1	basic leucine zipper nuclear factor 1
3.7487	F	rs13476178	1	154.191	1424194_at	1	167.486	cis	Rcsd1	RCSD domain containing 1
6.82107	F	c1.loc152	1	155.761	1439036_a_at	ambig	ambig	ambig	Atp1b1	ATPase, Na+/K+ transporting, beta 1 polypeptide
10.2185	F	c1.loc152	1	155.761	1426948_at	1	152.186	cis	Tpr	translocated promoter region
25.4181	F	c1.loc152	1	155.761	1448561_at	1	154.57	cis	Ncf2	neutrophil cytosolic factor 2
21.7309	F	c1.loc152	1	155.761	1444177_at	1	155.176	cis	---	PREDICTED: Mus musculus hypothetical protein LOC626058 (LOC626058), mRNA
3.6546	F	c1.loc154	1	157.761	1456086_x_at	X	7.05148	trans	LOC631302	similar to polyglutamine binding protein 1
3.4427	F	rs13476188	1	158.193	1423229_at	2	26.2184	trans	Inpp5e	inositol polyphosphate-5-phosphatase E
3.0266	F	rs13476188	1	158.193	1436312_at	11	11.6709	trans	Zfpn1a1	zinc finger protein, subfamily 1A, 1 (Ikaros)
26.623	F	rs13476188	1	158.193	1424265_at	1	155.265	cis	Npl	N-acetylneuraminate pyruvate lyase
6.90636	F	rs13476188	1	158.193	1426603_at	1	155.514	cis	Rnasel	ribonuclease L (2', 5'-oligoisoadenylate synthetase-dependent)
30.5047	F	rs13476188	1	158.193	1460009_at	1	156.859	cis	---	Transcribed locus
3.48194	F	rs13476191	1	158.897	1433946_at	ambig	ambig	ambig	Zik1	zinc finger protein interacting with K protein 1
4.9179	F	rs13476191	1	158.897	1439660_at	4	119.232	trans	Hivep3	human immunodeficiency virus type I enhancer binding protein 3
3.85895	F	rs13476191	1	158.897	1417327_at	6	17.2313	trans	Cav2	caveolin 2
3.15176	F	rs13476191	1	158.897	1419163_s_at	14	118.073	trans	Dnajc3	DnaJ (Hsp40) homolog, subfamily C, member 3
5.518	F	rs13476191	1	158.897	1426879_at	1	153.198	cis	1190005F20Rik	RIKEN cDNA 1190005F20 gene
8.98677	F	rs13476191	1	158.897	1418535_at	1	154.28	cis	Rgl1	ral guanine nucleotide dissociation stimulator,-like 1
6.03186	F	rs13476191	1	158.897	1440662_at	1	154.302	cis	Rgl1	Ral guanine nucleotide dissociation stimulator,-like 1
25.1149	F	rs13476191	1	158.897	1428789_at	1	158.641	cis	Ralgps2	Ral GEF with PH domain and SH3 binding motif 2
22.7863	F	c1.loc156	1	159.761	1417697_at	ambig	ambig	ambig	Soat1	sterol O-acyltransferase 1
28.6062	F	c1.loc156	1	159.761	1417696_at	ambig	ambig	ambig	Soat1	sterol O-acyltransferase 1
35.3609	F	c1.loc156	1	159.761	1417695_a_at	ambig	ambig	ambig	Soat1	sterol O-acyltransferase 1
3.31902	F	c1.loc156	1	159.761	1441139_at	13	12.237	trans	B330003H21	hypothetical protein B330003H21
7.06648	F	rs6209248	1	161.849	1431704_a_at	1	158.65	cis	Ralgps2	Ral GEF with PH domain and SH3 binding motif 2
5.15842	F	rs13476201	1	162.552	1446458_at	ambig	ambig	ambig	Rnasel	ribonuclease L (2', 5'-oligoisoadenylate synthetase-dependent)
5.6011	F	rs13476201	1	162.552	1418453_a_at	ambig	ambig	ambig	Atp1b1	ATPase, Na+/K+ transporting, beta 1 polypeptide
3.24083	F	rs13476201	1	162.552	1452209_at	2	59.1514	trans	Pkp4	plakophilin 4
3.19367	F	rs13476201	1	162.552	1435401_at	6	38.3111	trans	Ttc26	tetratricopeptide repeat domain 26
3.00902	F	rs13476201	1	162.552	1419546_at	15	38.6065	trans	Atp6v1c1	ATPase, H+ transporting, lysosomal V1 subunit C1
3.52415	F	rs13476201	1	162.552	1450951_at	19	53.6537	trans	Smc3	structural maintenace of chromosomes 3
12.0269	F	rs13476201	1	162.552	1434362_at	1	158.261	cis	AW550831	expressed sequence AW550831
4.48465	F	rs13476201	1	162.552	1425869_a_at	1	182.064	cis	Psen2	presenilin 2
9.11817	F	rs3022845	1	163.298	1437900_at	1	161.912	cis	4930523C07Rik	RIKEN cDNA 4930523C07 gene
16.6524	F	c1.loc160	1	163.761	1438663_at	1	164.508	cis	Bat2d	BAT2 domain containing 1
27.2232	F	c1.loc162	1	165.761	1429197_s_at	ambig	ambig	ambig	Rabgap1l	RAB GTPase activating protein 1-like
3.32318	F	rs4222751	1	166.152	1426291_at	13	108.068	trans	Dimt1	DIM1 dimethyladenosine transferase 1-like (S. cerevisiae)
3.01544	F	rs4222751	1	166.152	1452923_at	13	109.173	trans	Ndufa12l	Ndufa12-like
7.73116	F	rs4222751	1	166.152	1452960_at	1	165.766	cis	Scyl3	SCY1-like 3 (S. cerevisiae)
6.21273	F	rs6323784	1	166.943	1452047_at	1	162.04	cis	Cacybp	calcyclin binding protein
5.28506	F	rs6323784	1	166.943	1434796_at	1	164.435	cis	Vamp4	vesicle-associated membrane protein 4
8.29582	F	rs6323784	1	166.943	1428918_at	1	165.766	cis	Scyl3	SCY1-like 3 (S. cerevisiae)
4.30823	F	rs6323784	1	166.943	1425383_a_at	1	169.995	cis	Pbx1 /// LOC676870	pre B-cell leukemia transcription factor 1 /// region containing RIKEN cDNA 2310056B04 gene; pre B-cell leukemia transcription factor 1
4.28038	F	rs13476215	1	167.947	1429196_at	ambig	ambig	ambig	Rabgap1l	RAB GTPase activating protein 1-like
26.8467	F	rs13476215	1	167.947	1454994_at	ambig	ambig	ambig	Klhl20	kelch-like 20 (Drosophila)
3.24412	F	rs13476215	1	167.947	1460409_at	19	3.32233	trans	Cpt1a	carnitine palmitoyltransferase 1a, liver
29.7193	F	rs13476215	1	167.947	1434933_at	1	162.809	cis	5730557L09Rik	RIKEN cDNA 5730557L09 gene
14.2105	F	rs13476215	1	167.947	1424843_a_at	1	162.872	cis	Gas5	growth arrest specific 5
3.09021	F	rs13476215	1	167.947	1451783_a_at	1	165.616	cis	Kifap3	kinesin-associated protein 3
6.80128	F	rs13476215	1	167.947	1434365_a_at	1	165.79	cis	BC055324	cDNA sequence BC055324
15.2203	F	rs13476215	1	167.947	1437186_at	1	165.791	cis	BC055324	cDNA sequence BC055324
5.68569	F	rs13476215	1	167.947	1439740_s_at	1	169.06	cis	Uck2	uridine-cytidine kinase 2
6.28365	F	rs13459054	1	168.774	1436689_a_at	ambig	ambig	ambig	Aldh9a1	aldehyde dehydrogenase 9, subfamily A1
3.30529	F	rs13459054	1	168.774	1427888_a_at	2	29.8242	trans	Spna2 /// LOC381358	spectrin alpha 2 /// similar to Spectrin alpha chain, brain (Spectrin, non-erythroid alpha chain) (Alpha-II spectrin) (Fodrin alpha chain)
14.972	F	rs13459054	1	168.774	1448068_at	1	158.264	cis	Soat1	sterol O-acyltransferase 1
9.52308	F	rs13459054	1	168.774	1458365_at	1	165.223	cis	Scyl1bp1	SCY1-like 1 binding protein 1
3.57361	F	rs13459054	1	168.774	1419601_at	1	174.178	cis	Kcnj10	potassium inwardly-rectifying channel, subfamily J, member 10
3.32321	F	rs6363233	1	169.508	1428155_at	2	101.687	trans	Commd9	COMM domain containing 9
3.54428	F	rs6363233	1	169.508	1424172_at	17	24.5781	trans	Hagh	hydroxyacyl glutathione hydrolase
3.07296	F	c1.loc166	1	169.761	1433594_at	3	57.7343	trans	Commd2	COMM domain containing 2
3.18039	F	c1.loc166	1	169.761	1418325_at	7	127.063	trans	Sephs2	selenophosphate synthetase 2
3.20882	F	rs13476219	1	169.843	1419976_s_at	8	109.019	trans	Nfatc3	nuclear factor of activated T-cells, cytoplasmic, calcineurin-dependent 3
3.8735	F	rs13476219	1	169.843	1447249_at	8	109.743	trans	---	Transcribed locus
3.71179	F	rs3022848	1	170.422	1435658_at	ambig	ambig	ambig	Slc27a1	solute carrier family 27 (fatty acid transporter), member 1
5.06697	F	rs3022848	1	170.422	1422997_s_at	ambig	ambig	ambig	Acot1 /// Acot2	acyl-CoA thioesterase 1 /// acyl-CoA thioesterase 2
4.20842	F	rs3022848	1	170.422	1423433_at	1	145.518	trans	Trove2	TROVE domain family, member 2
3.55617	F	rs3022848	1	170.422	1426904_s_at	2	80.1165	trans	Dnajc10	DnaJ (Hsp40) homolog, subfamily C, member 10
3.29359	F	rs3022848	1	170.422	1434650_at	3	94.9564	trans	Pogz	pogo transposable element with ZNF domain
4.02461	F	rs3022848	1	170.422	1423432_at	9	82.6908	trans	Phip	pleckstrin homology domain interacting protein
3.08104	F	rs3022848	1	170.422	1435870_at	10	87.8993	trans	Sycp3	Synaptonemal complex protein 3
3.04508	F	rs3022848	1	170.422	1429045_at	11	106.637	trans	Smurf2	SMAD specific E3 ubiquitin protein ligase 2
3.00658	F	rs3022848	1	170.422	1426440_at	12	73.5692	trans	Dhrs7	dehydrogenase/reductase (SDR family) member 7
3.97221	F	rs3022848	1	170.422	1429335_at	12	74.8833	trans	Snapc1	small nuclear RNA activating complex, polypeptide 1
10.139	F	rs3022848	1	170.422	1417902_at	1	166.086	cis	Slc19a2	solute carrier family 19 (thiamine transporter), member 2
15.9392	F	rs3022848	1	170.422	1423833_a_at	1	167.298	cis	Brp44	brain protein 44
15.6398	F	rs3022848	1	170.422	1419716_a_at	1	167.712	cis	Pou2f1	POU domain, class 2, transcription factor 1
3.05298	F	rs6272538	1	171.268	1425951_a_at	ambig	ambig	ambig	Clec4n	C-type lectin domain family 4, member n
3.09321	F	rs6272538	1	171.268	1415720_s_at	ambig	ambig	ambig	Mad2l1bp	MAD2L1 binding protein
19.8482	F	rs6272538	1	171.268	1441315_s_at	ambig	ambig	ambig	Slc19a2	solute carrier family 19 (thiamine transporter), member 2
3.46331	F	rs6272538	1	171.268	1455032_at	1	64.6457	trans	9630037P07Rik	RIKEN cDNA 9630037P07 gene
5.33891	F	rs6272538	1	171.268	1438118_x_at	2	13.5004	trans	Vim	vimentin
3.05318	F	rs6272538	1	171.268	1455067_at	2	24.2273	trans	Psd4	pleckstrin and Sec7 domain containing 4
3.34328	F	rs6272538	1	171.268	1436184_at	2	181.512	trans	Gm632	gene model 632, (NCBI)
3.49984	F	rs6272538	1	171.268	1454696_at	4	154.402	trans	Gnb1	guanine nucleotide binding protein, beta 1
3.2374	F	rs6272538	1	171.268	1417670_at	8	4.25973	trans	Timm44	translocase of inner mitochondrial membrane 44
3.5577	F	rs6272538	1	171.268	1428176_at	9	20.7164	trans	Edg5	endothelial differentiation, sphingolipid G-protein-coupled receptor, 5
3.75943	F	rs6272538	1	171.268	1460439_at	9	45.8742	trans	BC033915	cDNA sequence BC033915
3.35311	F	rs6272538	1	171.268	1418479_at	11	21.1393	trans	Vps54	vacuolar protein sorting 54 (yeast)
3.33837	F	rs6272538	1	171.268	1428775_at	12	56.2224	trans	1110008L16Rik	RIKEN cDNA 1110008L16 gene
3.48093	F	rs6272538	1	171.268	1449800_x_at	14	30.0667	trans	Phf7	PHD finger protein 7
3.39099	F	rs6272538	1	171.268	1460283_at	16	3.62249	trans	Mefv	Mediterranean fever
8.02224	F	rs6272538	1	171.268	1435141_at	1	167.011	cis	Sft2d2	SFT2 domain containing 2
5.62676	F	rs6272538	1	171.268	1427695_a_at	1	167.717	cis	Pou2f1	POU domain, class 2, transcription factor 1
3.97331	F	rs6272538	1	171.268	1449542_at	1	169.957	cis	Pbx1	pre B-cell leukemia transcription factor 1
5.78863	F	rs6272538	1	171.268	1452913_at	1	173.01	cis	Pcp4l1	Purkinje cell protein 4-like 1
3.67023	F	c1.loc168	1	171.761	1417690_at	15	98.6408	trans	Prkag1	protein kinase, AMP-activated, gamma 1 non-catalytic subunit
8.63723	F	c1.loc168	1	171.761	1448604_at	1	169.061	cis	Uck2	uridine-cytidine kinase 2
4.48907	F	rs13476227	1	172.425	1450641_at	2	13.4918	trans	Vim	vimentin
3.44008	F	rs13476227	1	172.425	1449444_a_at	2	121.185	trans	Mfap1	microfibrillar-associated protein 1
4.27732	F	rs13476227	1	172.425	1455217_at	3	104.583	trans	Lrig2	leucine-rich repeats and immunoglobulin-like domains 2
3.65263	F	rs13476227	1	172.425	1436006_at	5	144.157	trans	Eif2ak1	eukaryotic translation initiation factor 2 alpha kinase 1
3.02401	F	rs13476227	1	172.425	1418996_a_at	6	145.168	trans	4930469P12Rik	RIKEN cDNA 4930469P12 gene
3.4023	F	rs13476227	1	172.425	1419655_at	9	61.1717	trans	Tle3	transducin-like enhancer of split 3, homolog of Drosophila E(spl)
3.37392	F	rs13476227	1	172.425	1456502_at	10	118.261	trans	Dyrk2	dual-specificity tyrosine-(Y)-phosphorylation regulated kinase 2
4.03776	F	rs13476227	1	172.425	1419006_s_at	14	47.0428	trans	Peli2	pellino 2
3.79614	F	rs13476227	1	172.425	1450172_at	17	31.2935	trans	Pknox1	Pbx/knotted 1 homeobox
4.57545	F	rs13476227	1	172.425	1437470_at	17	31.3351	trans	Pknox1	Pbx/knotted 1 homeobox
4.37652	F	rs13476227	1	172.425	1416656_at	17	34.6583	trans	Clic1	chloride intracellular channel 1
4.40296	F	rs13476227	1	172.425	1427314_at	18	46.7111	trans	Tmed7	transmembrane emp24 protein transport domain containing 7
10.1536	F	rs13476227	1	172.425	1434062_at	1	162.056	cis	Rabgap1l	RAB GTPase activating protein 1-like
3.20881	F	rs13476227	1	172.425	1424427_at	1	168.216	cis	Tada1l	transcriptional adaptor 1 (HFI1 homolog, yeast) like
3.55487	F	rs13476229	1	173.058	1438221_at	1	58.4671	trans	C130065N10Rik	RIKEN cDNA C130065N10 gene
4.43087	F	rs13476229	1	173.058	1456778_at	1	62.7329	trans	Nrp2	Neuropilin 2
3.02376	F	rs13476229	1	173.058	1426277_at	2	25.0775	trans	C730025P13Rik	RIKEN cDNA C730025P13 gene
5.07733	F	rs13476229	1	173.058	1428081_at	4	150.859	trans	Klhl21	kelch-like 21 (Drosophila)
3.63744	F	rs13476229	1	173.058	1460235_at	5	93.5191	trans	Scarb2	scavenger receptor class B, member 2
3.28753	F	rs13476229	1	173.058	1436985_at	5	106.878	trans	Zfp644	zinc finger protein 644
3.30361	F	rs13476229	1	173.058	1434105_at	9	111.119	trans	Epm2aip1	EPM2A (laforin) interacting protein 1
3.18595	F	rs13476229	1	173.058	1456200_at	10	70.7765	trans	Ipmk	inositol polyphosphate multikinase
3.14553	F	rs13476229	1	173.058	1455336_at	10	114.772	trans	Thap2	THAP domain containing, apoptosis associated protein 2
4.2332	F	rs13476229	1	173.058	1423201_at	11	62.1327	trans	Ncor1	nuclear receptor co-repressor 1
3.79826	F	rs13476229	1	173.058	1431050_at	12	100.951	trans	Rps6ka5	ribosomal protein S6 kinase, polypeptide 5
3.13645	F	rs13476229	1	173.058	1451281_at	13	21.3707	trans	Zfp96	zinc finger protein 96
4.54212	F	rs13476229	1	173.058	1424359_at	15	76.1239	trans	Oplah	5-oxoprolinase (ATP-hydrolysing)
3.10579	F	rs13476229	1	173.058	1418039_at	16	37.4591	trans	Rabl3	RAB, member of RAS oncogene family-like 3
4.19895	F	rs13476229	1	173.058	1419998_at	16	48.9383	trans	---	Transcribed locus
4.74427	F	rs13476229	1	173.058	1434168_at	19	45.0654	trans	Peo1	progressive external ophthalmoplegia 1 (human)
3.53233	F	rs13476229	1	173.058	1460246_at	X	70.2793	trans	Mecp2	methyl CpG binding protein 2
3.20617	F	rs13476229	1	173.058	1450919_at	X	71.3625	trans	Mpp1	membrane protein, palmitoylated
8.67139	F	rs13476229	1	173.058	1440423_at	1	162.845	cis	Zbtb37	zinc finger and BTB domain containing 37
4.7078	F	rs13476229	1	173.058	1435142_at	1	167.011	cis	Sft2d2	SFT2 domain containing 2
4.19521	F	rs13476229	1	173.058	1415948_at	1	167.6	cis	Creg1	cellular repressor of E1A-stimulated genes 1
3.85568	F	rs13476229	1	173.058	1417468_at	1	173.177	cis	Nit1	nitrilase 1
3.3914	F	c1.loc170	1	173.761	1453040_at	ambig	ambig	ambig	2810402A17Rik	RIKEN cDNA 2810402A17 gene
4.44803	F	c1.loc170	1	173.761	1453087_at	5	139.253	trans	6330403L08Rik	RIKEN cDNA 6330403L08 gene
4.73829	F	c1.loc170	1	173.761	1450153_at	10	52.0269	trans	Gopc	golgi associated PDZ and coiled-coil motif containing
10.4842	F	c1.loc170	1	173.761	1453312_at	1	167.166	cis	Iqwd1	IQ motif and WD repeats 1
3.05723	F	c1.loc172	1	175.761	1427948_a_at	5	145.454	trans	Zfp99	zinc finger protein 99
5.24775	F	c1.loc172	1	175.761	1428167_a_at	1	167.429	cis	Mpzl1	myelin protein zero-like 1
3.47545	F	c1.loc172	1	175.761	1434994_at	1	173.178	cis	Dedd	death effector domain-containing
3.15973	F	rs13476241	1	176.738	1455034_at	ambig	ambig	ambig	Nr4a2	Nuclear receptor subfamily 4, group A, member 2
3.42444	F	rs13476241	1	176.738	1438223_at	ambig	ambig	ambig	Vps54	Vacuolar protein sorting 54 (yeast)
3.49024	F	rs13476241	1	176.738	1453846_at	ambig	ambig	ambig	2810013C04Rik	RIKEN cDNA 2810013C04 gene
3.05352	F	rs13476241	1	176.738	1435787_at	3	69.6479	trans	Ppm1l	protein phosphatase 1 (formerly 2C)-like
3.22335	F	rs13476241	1	176.738	1450964_a_at	4	108.559	trans	Osbpl9	oxysterol binding protein-like 9
3.02649	F	rs13476241	1	176.738	1451200_at	4	148.02	trans	Kif1b	kinesin family member 1B
3.26546	F	rs13476241	1	176.738	1450674_at	5	23.9283	trans	Cdk5	cyclin-dependent kinase 5
4.4681	F	rs13476241	1	176.738	1426979_at	5	123.706	trans	Mlxip	MLX interacting protein
3.13558	F	rs13476241	1	176.738	1447295_at	5	136.714	trans	Cutl1	Cut-like 1 (Drosophila)
3.2597	F	rs13476241	1	176.738	1430496_at	6	40.2551	trans	6720408I04Rik	RIKEN cDNA 6720408I04 gene
3.17798	F	rs13476241	1	176.738	1420630_at	6	135.164	trans	8430419L09Rik	RIKEN cDNA 8430419L09 gene
4.3208	F	rs13476241	1	176.738	1421021_at	6	140.587	trans	---	---
3.03571	F	rs13476241	1	176.738	1452997_at	8	20.2821	trans	2610005L07Rik	RIKEN cDNA 2610005L07 gene
3.09675	F	rs13476241	1	176.738	1434281_at	8	74.4041	trans	1500034J01Rik	RIKEN cDNA 1500034J01 gene
3.47285	F	rs13476241	1	176.738	1422211_a_at	8	74.6209	trans	B3gnt3	UDP-GlcNAc:betaGal beta-1,3-N-acetylglucosaminyltransferase 3
3.05079	F	rs13476241	1	176.738	1417857_at	8	82.164	trans	Mmaa	methylmalonic aciduria (cobalamin deficiency) type A
3.06003	F	rs13476241	1	176.738	1437256_at	9	7.20517	trans	---	---
3.05023	F	rs13476241	1	176.738	1448420_a_at	9	20.3881	trans	Fbxl12	F-box and leucine-rich repeat protein 12
3.70128	F	rs13476241	1	176.738	1418685_at	9	34.9366	trans	Tirap	toll-interleukin 1 receptor (TIR) domain-containing adaptor protein
4.31205	F	rs13476241	1	176.738	1435446_a_at	10	87.902	trans	Chpt1	choline phosphotransferase 1
3.22012	F	rs13476241	1	176.738	1424138_at	11	32.1096	trans	Rhbdf1	rhomboid family 1 (Drosophila)
3.14947	F	rs13476241	1	176.738	1416104_at	11	69.4729	trans	Mpdu1	mannose-P-dolichol utilization defect 1
3.45985	F	rs13476241	1	176.738	1425550_a_at	11	109.465	trans	Prkar1a	protein kinase, cAMP dependent regulatory, type I, alpha
3.33228	F	rs13476241	1	176.738	1417365_a_at	12	100.601	trans	Calm1	calmodulin 1
3.29728	F	rs13476241	1	176.738	1442675_at	13	63.2529	trans	2010111I01Rik	RIKEN cDNA 2010111I01 gene
3.29085	F	rs13476241	1	176.738	1419290_at	14	30.3079	trans	Mettl6	methyltransferase like 6
3.10116	F	rs13476241	1	176.738	1430453_a_at	14	53.8378	trans	Bcl2l2	Bcl2-like 2
3.09571	F	rs13476241	1	176.738	1416171_at	15	98.3468	trans	2310037I24Rik	RIKEN cDNA 2310037I24 gene
3.02903	F	rs13476241	1	176.738	1418043_at	16	20.2448	trans	Abcc5	ATP-binding cassette, sub-family C (CFTR/MRP), member 5
3.574	F	rs13476241	1	176.738	1436125_at	16	78.4229	trans	D16Ertd472e	DNA segment, Chr 16, ERATO Doi 472, expressed
3.88216	F	rs13476241	1	176.738	1417142_at	17	15.1012	trans	4932442K08Rik	RIKEN cDNA 4932442K08 gene
4.27038	F	rs13476241	1	176.738	1419291_x_at	1	162.872	cis	Gas5	growth arrest specific 5
6.36072	F	rs13476241	1	176.738	1449410_a_at	1	162.872	cis	Gas5	growth arrest specific 5
4.05165	F	rs13476241	1	176.738	1423223_a_at	1	163.078	cis	Prdx6	peroxiredoxin 6
5.48564	F	rs13476241	1	176.738	1415947_at	1	167.6	cis	Creg1	cellular repressor of E1A-stimulated genes 1
5.04403	F	rs13476241	1	176.738	1444380_at	1	167.609	cis	AI844869	expressed sequence AI844869
9.86107	F	rs13476241	1	176.738	1429382_at	1	173.056	cis	Tomm40l	translocase of outer mitochondrial membrane 40 homolog-like (yeast)
4.07314	F	rs13476241	1	176.738	1432000_a_at	1	173.168	cis	Dedd	death effector domain-containing
4.14092	F	rs13476241	1	176.738	1417469_at	1	173.177	cis	Nit1	nitrilase 1
8.82207	F	rs13476241	1	176.738	1436171_at	1	173.245	cis	Arhgap30	Rho GTPase activating protein 30
3.58324	F	rs13476241	1	176.738	1431203_at	1	178.652	cis	Sdccag8	serologically defined colon cancer antigen 8
3.03236	F	c1.loc174	1	177.761	1437872_at	ambig	ambig	ambig	AB112350	cDNA sequence AB112350
3.61627	F	c1.loc174	1	177.761	1439962_at	ambig	ambig	ambig	2310010J17Rik	RIKEN cDNA 2310010J17 gene
9.30487	F	c1.loc174	1	177.761	1457199_at	ambig	ambig	ambig	---	---
3.59618	F	c1.loc174	1	177.761	1450935_at	1	44.0924	trans	Ercc5	excision repair cross-complementing rodent repair deficiency, complementation group 5
3.42974	F	c1.loc174	1	177.761	1429505_at	1	60.28	trans	2310076G13Rik	RIKEN cDNA 2310076G13 gene
3.217	F	c1.loc174	1	177.761	1457472_at	1	89.187	trans	Tnrc15	trinucleotide repeat containing 15
3.7645	F	c1.loc174	1	177.761	1418634_at	2	26.2799	trans	Notch1	Notch gene homolog 1 (Drosophila)
4.52659	F	c1.loc174	1	177.761	1422687_at	3	103.187	trans	---	---
4.01946	F	c1.loc174	1	177.761	1437290_at	4	4.68963	trans	Impad1	inositol monophosphatase domain containing 1
3.07559	F	c1.loc174	1	177.761	1429392_at	4	41.4802	trans	Wdr40a	WD repeat domain 40A
4.7367	F	c1.loc174	1	177.761	1454930_at	9	42.1633	trans	Lrrc35	leucine rich repeat containing 35
3.58358	F	c1.loc174	1	177.761	1450816_at	11	106.584	trans	Polg2	polymerase (DNA directed), gamma 2, accessory subunit
3.34834	F	c1.loc174	1	177.761	1440856_at	14	32.207	trans	Mapk8	mitogen activated protein kinase 8
3.62057	F	c1.loc174	1	177.761	1459976_s_at	16	90.114	trans	Sod1	superoxide dismutase 1, soluble
3.45762	F	c1.loc174	1	177.761	1416616_s_at	17	56.6752	trans	Clpp	caseinolytic peptidase, ATP-dependent, proteolytic subunit homolog (E. coli)
3.81601	F	c1.loc174	1	177.761	1426912_at	1	161.069	cis	Rfwd2 /// LOC621205	ring finger and WD repeat domain 2 /// similar to constitutive photomorphogenic protein 1
3.52617	F	c1.loc174	1	177.761	1458429_at	1	173.244	cis	Arhgap30	Rho GTPase activating protein 30
5.60061	F	rs13476249	1	178.303	1451096_at	1	173.072	cis	Ndufs2	NADH dehydrogenase (ubiquinone) Fe-S protein 2
3.36112	F	rs13476251	1	178.648	1437606_at	ambig	ambig	ambig	---	Transcribed locus, weakly similar to NP_808467.1 hypothetical protein LOC327860 [Mus musculus]
3.60202	F	rs13476251	1	178.648	1416765_s_at	ambig	ambig	ambig	Magmas	mitochondria-associated protein involved in granulocyte-macrophage colony-stimulating factor signal transduction
3.18583	F	rs13476251	1	178.648	1453804_a_at	2	48.7273	trans	Orc4l	origin recognition complex, subunit 4-like (S. cerevisiae)
3.13647	F	rs13476251	1	178.648	1417102_a_at	3	32.9286	trans	Ndufb5	NADH dehydrogenase (ubiquinone) 1 beta subcomplex, 5
3.32631	F	rs13476251	1	178.648	1428875_at	3	75.9621	trans	Golph4	golgi phosphoprotein 4
3.03918	F	rs13476251	1	178.648	1436391_s_at	3	108.805	trans	Clcc1	chloride channel CLIC-like 1
3.33558	F	rs13476251	1	178.648	1452372_at	4	128.964	trans	Bsdc1	BSD domain containing 1
4.00794	F	rs13476251	1	178.648	1424211_at	4	148.588	trans	5730438N18Rik	RIKEN cDNA 5730438N18 gene
3.21507	F	rs13476251	1	178.648	1429363_at	8	42.0106	trans	Vps37a	vacuolar protein sorting 37A (yeast)
4.61189	F	rs13476251	1	178.648	1426264_at	9	50.3869	trans	Dlat	dihydrolipoamide S-acetyltransferase (E2 component of pyruvate dehydrogenase complex)
3.01355	F	rs13476251	1	178.648	1454905_at	9	85.4841	trans	Ibtk	inhibitor of Bruton agammaglobulinemia tyrosine kinase
3.15558	F	rs13476251	1	178.648	1448758_at	10	66.662	trans	LOC627232 /// LOC627424 /// Nrbf2	similar to nuclear receptor binding factor 2 /// similar to nuclear receptor binding factor 2 /// nuclear receptor binding factor 2
3.21999	F	rs13476251	1	178.648	1423347_at	12	59.8767	trans	Sec23a	SEC23A (S. cerevisiae)
3.13756	F	rs13476251	1	178.648	1456236_s_at	18	47.2129	trans	Commd10	COMM domain containing 10
8.47297	F	rs13476251	1	178.648	1428168_at	1	167.429	cis	Mpzl1	myelin protein zero-like 1
4.67209	F	rs13476251	1	178.648	1416618_at	1	173.114	cis	Ppox	protoporphyrinogen oxidase
5.10923	F	rs13476251	1	178.648	1456538_at	1	178.785	cis	Sdccag8	serologically defined colon cancer antigen 8
3.43872	F	rs3706759	1	180.708	1437146_x_at	ambig	ambig	ambig	Coro7	coronin 7
3.38747	F	rs3706759	1	180.708	1435719_at	4	34.7683	trans	AI448984	expressed sequence AI448984
3.08793	F	rs3706759	1	180.708	1417135_at	5	23.0176	trans	Srpk2	serine/arginine-rich protein specific kinase 2
4.06488	F	rs3706759	1	180.708	1435468_at	8	108.142	trans	C76566	expressed sequence C76566
3.2735	F	rs3706759	1	180.708	1439654_at	9	100.357	trans	LOC319225 /// LOC633385	hypothetical LOC319225 /// hypothetical protein LOC633385
3.55804	F	rs3706759	1	180.708	1417882_at	10	80.4317	trans	Slc39a3	solute carrier family 39 (zinc transporter), member 3
3.44481	F	rs3706759	1	180.708	1424533_a_at	11	120.274	trans	3110023B02Rik	RIKEN cDNA 3110023B02 gene
3.29589	F	rs3706759	1	180.708	1422286_a_at	17	70.7495	trans	Tgif	TG interacting factor
3.30831	F	rs3022875	1	182.29	1457676_at	ambig	ambig	ambig	Tirap	toll-interleukin 1 receptor (TIR) domain-containing adaptor protein
3.36098	F	rs3022875	1	182.29	1440559_at	ambig	ambig	ambig	Hmga2-ps1	high mobility group AT-hook 2, pseudogene 1
4.64802	F	rs3022875	1	182.29	1424749_at	1	79.5843	trans	Wdfy1	WD repeat and FYVE domain containing 1
3.2541	F	rs3022875	1	182.29	1456328_at	3	135.991	trans	Bank1	B-cell scaffold protein with ankyrin repeats 1
3.00944	F	rs3022875	1	182.29	1418660_at	5	77.2857	trans	Clock /// LOC620729	circadian locomoter output cycles kaput /// hypothetical protein LOC620729
3.67907	F	rs3022875	1	182.29	1436618_at	6	85.1787	trans	Sfxn5	sideroflexin 5
3.60722	F	rs3022875	1	182.29	1429040_at	8	20.2821	trans	2610005L07Rik	RIKEN cDNA 2610005L07 gene
3.69917	F	rs3022875	1	182.29	1424267_at	10	77.3817	trans	1810043G02Rik	RIKEN cDNA 1810043G02 gene
3.00339	F	rs3022875	1	182.29	1437476_at	15	37.8693	trans	Rrm2b	ribonucleotide reductase M2 B (TP53 inducible)
3.11826	F	rs3022875	1	182.29	1437524_x_at	16	4.54211	trans	Coro7	coronin 7
3.07633	F	rs3022875	1	182.29	1452012_a_at	19	41.9769	trans	Exosc1	exosome component 1
10.8336	F	rs3022875	1	182.29	1440296_at	1	179.993	cis	LOC666250 /// LOC669419	hypothetical protein LOC666250 /// hypothetical protein LOC669419
5.75376	F	rs3022875	1	182.29	1452817_at	1	180.793	cis	Smyd3	SET and MYND domain containing 3
19.9763	F	rs3022875	1	182.29	1426510_at	1	181.505	cis	Sccpdh	saccharopine dehydrogenase (putative)
3.61022	F	rs4222857	1	182.356	1420513_at	1	180.243	cis	Efcab2	EF-hand calcium binding domain 2
3.05663	F	rs13476264	1	183.444	1444058_at	16	48.868	trans	2310047C04Rik	RIKEN cDNA 2310047C04 gene
3.07077	F	rs13476264	1	183.444	1423300_at	19	55.3515	trans	Zdhhc6	zinc finger, DHHC domain containing 6
3.76717	F	rs13476264	1	183.444	1443330_at	1	164.563	cis	D1Ertd646e	DNA segment, Chr 1, ERATO Doi 646, expressed
5.81206	F	rs13476264	1	183.444	1460726_at	1	179.6	cis	Adss	adenylosuccinate synthetase, non muscle
29.4653	F	rs13476264	1	183.444	1423441_at	1	181.365	cis	Tfb2m	transcription factor B2, mitochondrial
6.85187	F	rs13476264	1	183.444	1448047_at	1	182.926	cis	---	Adult male medulla oblongata cDNA, RIKEN full-length enriched library, clone:6330524D21 product:unclassifiable, full insert sequence
3.91691	F	c1.loc180	1	183.761	1451354_at	9	34.9541	trans	Foxred1	FAD-dependent oxidoreductase domain containing 1
3.45642	F	c1.loc180	1	183.761	1436795_at	1	181.447	cis	9630058J23Rik	RIKEN cDNA 9630058J23 gene
3.06623	F	rs3022877	1	184.698	1423724_at	ambig	ambig	ambig	Zwint	ZW10 interactor
3.40086	F	rs3022877	1	184.698	1439009_at	ambig	ambig	ambig	Gnl3l	guanine nucleotide binding protein-like 3 (nucleolar)-like
7.49099	F	rs3022877	1	184.698	1459853_x_at	ambig	ambig	ambig	---	---
3.0146	F	rs3022877	1	184.698	1458295_at	3	88.4207	trans	BC038331	cDNA sequence BC038331
3.46467	F	rs3022877	1	184.698	1433881_at	4	150.824	trans	Dnajc11	DnaJ (Hsp40) homolog, subfamily C, member 11
3.11475	F	rs3022877	1	184.698	1455825_s_at	5	74.8784	trans	Lnx1	ligand of numb-protein X 1
3.3124	F	rs3022877	1	184.698	1436542_at	8	86.5566	trans	Ptger1	Prostaglandin E receptor 1 (subtype EP1)
3.7765	F	rs3022877	1	184.698	1424384_a_at	8	114.424	trans	Znrf1	zinc and ring finger 1
3.50878	F	rs3022877	1	184.698	1460570_at	8	127.255	trans	Pgbd5	piggyBac transposable element derived 5
3.07273	F	rs3022877	1	184.698	1444726_at	10	111.392	trans	Krr1	KRR1, small subunit (SSU) processome component, homolog (yeast)
15.2119	F	rs3022877	1	184.698	1423871_at	1	182.783	cis	Tmem63a	transmembrane protein 63a
7.28728	F	rs3022877	1	184.698	1423961_at	1	183.011	cis	Wdr26	WD repeat domain 26
17.295	F	rs8265814	1	185.029	1436151_x_at	ambig	ambig	ambig	BC031781	cDNA sequence BC031781
4.01257	F	rs8265814	1	185.029	1436535_at	1	145.513	trans	Trove2	TROVE domain family, member 2
3.30384	F	rs8265814	1	185.029	1440947_at	1	164.507	trans	Bat2d	BAT2 domain containing 1
3.72779	F	rs8265814	1	185.029	1451233_at	2	25.3409	trans	Traf2	Tnf receptor-associated factor 2
3.22824	F	rs8265814	1	185.029	1460486_at	2	37.2654	trans	Rabgap1	RAB GTPase activating protein 1
3.11805	F	rs8265814	1	185.029	1456389_at	2	44.8055	trans	Zfhx1b	zinc finger homeobox 1b
3.1962	F	rs8265814	1	185.029	1422748_at	2	44.81	trans	Zfhx1b	zinc finger homeobox 1b
3.22441	F	rs8265814	1	185.029	1450654_a_at	4	133.241	trans	Dhdds	dehydrodolichyl diphosphate synthase
3.37129	F	rs8265814	1	185.029	1433824_x_at	5	89.734	trans	Grsf1	G-rich RNA sequence binding factor 1
3.13091	F	rs8265814	1	185.029	1452497_a_at	8	108.948	trans	Nfatc3	nuclear factor of activated T-cells, cytoplasmic, calcineurin-dependent 3
4.78712	F	rs8265814	1	185.029	1452102_at	9	98.3731	trans	Copb2	coatomer protein complex, subunit beta 2 (beta prime)
3.11085	F	rs8265814	1	185.029	1439942_at	10	44.8479	trans	Prep	prolyl endopeptidase
3.68493	F	rs8265814	1	185.029	1417564_at	11	46.2804	trans	Crsp9	cofactor required for Sp1 transcriptional activation, subunit 9
3.09529	F	rs8265814	1	185.029	1428267_at	11	86.5856	trans	Dhx40	DEAH (Asp-Glu-Ala-His) box polypeptide 40
3.55895	F	rs8265814	1	185.029	1433436_s_at	14	54.0518	trans	Thtpa /// Zfhx2as	thiamine triphosphatase /// zinc finger homeobox 2, antisense
3.25062	F	rs8265814	1	185.029	1438930_s_at	X	70.2793	trans	Mecp2	methyl CpG binding protein 2
5.28103	F	rs8265814	1	185.029	1422503_s_at	1	182.406	cis	Parp1	poly (ADP-ribose) polymerase family, member 1
7.17283	F	rs8265814	1	185.029	1422502_at	1	182.406	cis	Parp1	poly (ADP-ribose) polymerase family, member 1
7.33983	F	rs8265814	1	185.029	1429763_at	1	182.988	cis	Cnih4	cornichon homolog 4 (Drosophila)
3.2585	F	c1.loc182	1	185.761	1427736_a_at	9	110.9	trans	Ccrl2	chemokine (C-C motif) receptor-like 2
3.21559	F	c1.loc182	1	185.761	1428130_at	18	66.1061	trans	Lman1	lectin, mannose-binding, 1
4.26223	F	c1.loc182	1	185.761	1427672_a_at	X	17.3204	trans	Utx	ubiquitously transcribed tetratricopeptide repeat gene, X chromosome
3.15459	F	c1.loc182	1	185.761	1429012_at	X	53.5783	trans	Arhgef6	Rac/Cdc42 guanine nucleotide exchange factor (GEF) 6
5.08827	F	rs13476279	1	187.449	1439606_at	ambig	ambig	ambig	---	Transcribed locus
3.20714	F	rs13476279	1	187.449	1430989_a_at	2	119.286	trans	1700020I14Rik	RIKEN cDNA 1700020I14 gene
3.56141	F	rs13476279	1	187.449	1416699_at	2	156.554	trans	1110008F13Rik	RIKEN cDNA 1110008F13 gene
3.60125	F	rs13476279	1	187.449	1441639_at	5	123.959	trans	Zcchc8	zinc finger, CCHC domain containing 8
3.00478	F	rs13476279	1	187.449	1449271_a_at	10	18.2295	trans	Hebp2	heme binding protein 2
11.8339	F	rs13476279	1	187.449	1417010_at	1	179.282	cis	Zfp238	zinc finger protein 238
4.25736	F	rs13476279	1	187.449	1451188_at	1	183.011	cis	Wdr26	WD repeat domain 26
6.5589	F	rs13476279	1	187.449	1426735_at	1	186.986	cis	Iars2	isoleucine-tRNA synthetase 2, mitochondrial
3.96235	F	c1.loc184	1	187.761	1434072_at	11	60.5486	trans	Smcr7	Smith-Magenis syndrome chromosome region, candidate 7 homolog (human)
3.59326	F	c1.loc184	1	187.761	1425185_at	1	180.024	cis	5830417C01Rik	RIKEN cDNA 5830417C01 gene
3.05987	F	rs6348421	1	189.3	1417199_at	1	136.163	trans	1300007B12Rik	RIKEN cDNA 1300007B12 gene
3.29634	F	rs6348421	1	189.3	1435067_at	2	25.405	trans	B230208H17Rik	RIKEN cDNA B230208H17 gene
3.25735	F	rs6348421	1	189.3	1424542_at	3	90.6878	trans	S100a4	S100 calcium binding protein A4
3.29325	F	rs6348421	1	189.3	1421147_at	8	109.959	trans	Terf2	telomeric repeat binding factor 2
3.49554	F	rs6348421	1	189.3	1433708_at	11	116.061	trans	Srp68	signal recognition particle 68
3.19602	F	rs13476286	1	189.529	1426807_at	ambig	ambig	ambig	Lta4h	Leukotriene A4 hydrolase
3.73893	F	c1.loc186	1	189.761	1428438_s_at	7	34.0534	trans	Lsm14a	LSM14 homolog A (SCD6, S. cerevisiae)
3.14826	F	c1.loc186	1	189.761	1455468_at	7	35.3943	trans	---	0 day neonate kidney cDNA, RIKEN full-length enriched library, clone:D630029P09 product:unclassifiable, full insert sequence
3.39143	F	c1.loc186	1	189.761	1426679_at	15	36.9434	trans	Zfp706	zinc finger protein 706
11.1467	F	c1.loc186	1	189.761	1426713_s_at	1	187.064	cis	Eprs /// LOC633677	glutamyl-prolyl-tRNA synthetase /// similar to Bifunctional aminoacyl-tRNA synthetase
3.03887	F	rs13476290	1	190.827	1455911_x_at	ambig	ambig	ambig	Ndufb11	NADH dehydrogenase (ubiquinone) 1 beta subcomplex, 11
3.11391	F	rs13476290	1	190.827	1439024_at	ambig	ambig	ambig	Bag4	BCL2-associated athanogene 4
3.2235	F	rs13476290	1	190.827	1450881_s_at	ambig	ambig	ambig	Gpr137b	G protein-coupled receptor 137B
3.46295	F	rs13476290	1	190.827	1432144_a_at	ambig	ambig	ambig	Rchy1	ring finger and CHY zinc finger domain containing 1
4.01646	F	rs13476290	1	190.827	1449703_at	ambig	ambig	ambig	Zfand2a	Zinc finger, AN1-type domain 2A
3.31182	F	rs13476290	1	190.827	1435343_at	1	80.3801	trans	Dock10 /// LOC630691	dedicator of cytokinesis 10 /// similar to Dedicator of cytokinesis protein 10 (Protein zizimin 3)
4.48896	F	rs13476290	1	190.827	1423759_a_at	1	169.145	trans	Tmco1	transmembrane and coiled-coil domains 1
3.95018	F	rs13476290	1	190.827	1419243_at	2	35.002	trans	Rab14	RAB14, member RAS oncogene family
4.35825	F	rs13476290	1	190.827	1452230_at	2	80.1165	trans	Dnajc10	DnaJ (Hsp40) homolog, subfamily C, member 10
3.28006	F	rs13476290	1	190.827	1420641_a_at	2	122.473	trans	Sqrdl	sulfide quinone reductase-like (yeast)
4.37125	F	rs13476290	1	190.827	1456120_at	2	125.444	trans	3110001I20Rik	RIKEN cDNA 3110001I20 gene
3.16938	F	rs13476290	1	190.827	1419034_at	2	151.918	trans	Csnk2a1	casein kinase 2, alpha 1 polypeptide
3.21751	F	rs13476290	1	190.827	1455698_at	3	31.0112	trans	Tloc1	translocation protein 1
3.41695	F	rs13476290	1	190.827	1428709_a_at	3	88.0054	trans	Mrpl24	mitochondrial ribosomal protein L24
3.53498	F	rs13476290	1	190.827	1444150_at	4	131.22	trans	Epb4.1	erythrocyte protein band 4.1
3.06325	F	rs13476290	1	190.827	1419209_at	5	91.9665	trans	Cxcl1	chemokine (C-X-C motif) ligand 1
3.03699	F	rs13476290	1	190.827	1429588_at	6	149.292	trans	2810474O19Rik	RIKEN cDNA 2810474O19 gene
3.24177	F	rs13476290	1	190.827	1430214_a_at	7	119.585	trans	2610020H08Rik	RIKEN cDNA 2610020H08 gene
3.14731	F	rs13476290	1	190.827	1436673_at	7	119.644	trans	2610020H08Rik	RIKEN cDNA 2610020H08 gene
3.60394	F	rs13476290	1	190.827	1452770_at	7	127.684	trans	Vkorc1	vitamin K epoxide reductase complex, subunit 1
3.11379	F	rs13476290	1	190.827	1429041_at	8	20.2821	trans	2610005L07Rik	RIKEN cDNA 2610005L07 gene
3.68973	F	rs13476290	1	190.827	1430614_at	8	122.646	trans	4632415K11Rik	RIKEN cDNA 4632415K11 gene
3.06937	F	rs13476290	1	190.827	1448452_at	8	123.622	trans	Irf8	interferon regulatory factor 8
3.37585	F	rs13476290	1	190.827	1416714_at	8	123.622	trans	Irf8	interferon regulatory factor 8
3.03893	F	rs13476290	1	190.827	1420723_at	10	23.5409	trans	Vnn3	vanin 3
3.22486	F	rs13476290	1	190.827	1415684_at	10	43.9568	trans	Atg5	autophagy-related 5 (yeast)
3.58436	F	rs13476290	1	190.827	1452874_at	10	61.9538	trans	2510003E04Rik	RIKEN cDNA 2510003E04 gene
3.17703	F	rs13476290	1	190.827	1452043_at	10	79.7214	trans	2310011J03Rik	RIKEN cDNA 2310011J03 gene
3.85448	F	rs13476290	1	190.827	1424054_at	10	80.0457	trans	Btbd2	BTB (POZ) domain containing 2
3.00609	F	rs13476290	1	190.827	1459813_at	10	127.071	trans	1700012D01Rik	RIKEN cDNA 1700012D01 gene
3.47971	F	rs13476290	1	190.827	1423540_at	10	127.536	trans	Rbms2	RNA binding motif, single stranded interacting protein 2
3.00276	F	rs13476290	1	190.827	1455315_at	11	77.3243	trans	Trp53i13	tumor protein p53 inducible protein 13
3.4812	F	rs13476290	1	190.827	1435898_x_at	13	3.56478	trans	Gdi2	guanosine diphosphate (GDP) dissociation inhibitor 2
3.04931	F	rs13476290	1	190.827	1416369_at	13	65.0798	trans	Hiatl1	hippocampus abundant transcript-like 1
3.0706	F	rs13476290	1	190.827	1416360_at	13	114.713	trans	Snag1	sorting nexin associated golgi protein 1
3.2327	F	rs13476290	1	190.827	1456477_at	15	98.3667	trans	Ccnt1	cyclin T1
3.06509	F	rs13476290	1	190.827	1426378_at	15	101.902	trans	Eif4b	eukaryotic translation initiation factor 4B
3.35985	F	rs13476290	1	190.827	1451466_at	16	78.4252	trans	D16Ertd472e	DNA segment, Chr 16, ERATO Doi 472, expressed
4.49955	F	rs13476290	1	190.827	1436676_at	17	24.643	trans	Mapk8ip3	mitogen-activated protein kinase 8 interacting protein 3
3.05843	F	rs13476290	1	190.827	1451226_at	17	46.1747	trans	Pex6	peroxisomal biogenesis factor 6
3.34306	F	rs13476290	1	190.827	1424078_s_at	17	46.1747	trans	Pex6	peroxisomal biogenesis factor 6
3.10456	F	rs13476290	1	190.827	1438233_at	19	45.0348	trans	6030443O07Rik	RIKEN cDNA 6030443O07 gene
3.60583	F	rs13476290	1	190.827	1448805_at	1	173.248	cis	Usf1	upstream transcription factor 1
3.96123	F	rs13476290	1	190.827	1448861_at	1	193.698	cis	Traf5 /// LOC622602	Tnf receptor-associated factor 5 /// similar to TNF receptor-associated factor 5
3.34913	F	c1.loc188	1	191.761	1449213_at	ambig	ambig	ambig	Lage3	L antigen family, member 3
4.28599	F	c1.loc188	1	191.761	1439089_at	1	141.267	trans	Zbtb41	zinc finger and BTB domain containing 41 homolog
4.00214	F	c1.loc188	1	191.761	1433794_at	2	28.9989	trans	Setx	senataxin
3.37882	F	c1.loc188	1	191.761	1428308_at	2	152.7	trans	Pdrg1	p53 and DNA damage regulated 1
3.07575	F	c1.loc188	1	191.761	1450966_at	5	8.97204	trans	Crot	carnitine O-octanoyltransferase
3.19222	F	c1.loc188	1	191.761	1431328_at	5	32.7689	trans	Ppp1cb	protein phosphatase 1, catalytic subunit, beta isoform
3.09604	F	c1.loc188	1	191.761	1426818_at	7	68.6105	trans	Arrdc4	arrestin domain containing 4
3.61191	F	c1.loc188	1	191.761	1443733_x_at	7	99.9562	trans	Pold3	polymerase (DNA-directed), delta 3, accessory subunit
3.05332	F	c1.loc188	1	191.761	1424179_at	10	80.1992	trans	Plekhj1	pleckstrin homology domain containing, family J member 1
3.1645	F	c1.loc188	1	191.761	1428314_at	16	55.9405	trans	Pcnp	PEST proteolytic signal containing nuclear protein
3.41028	F	c1.loc188	1	191.761	1434896_at	17	32.9185	trans	Zfp422-rs1	zinc finger protein 422, related sequence 1
3.14402	F	c1.loc190	1	193.761	1426548_a_at	ambig	ambig	ambig	Atpbd4	ATP binding domain 4
3.35772	F	c1.loc190	1	193.761	1451668_at	1	158.515	trans	C530043G21Rik	RIKEN cDNA C530043G21 gene
3.97604	F	c1.loc190	1	193.761	1418316_a_at	12	112.022	trans	Mark3	MAP/microtubule affinity-regulating kinase 3
3.53769	F	c1.loc190	1	193.761	1451495_at	18	7.86919	trans	Wac	WW domain containing adaptor with coiled-coil
3.15519	F	rs13476302	1	194.514	1440338_at	ambig	ambig	ambig	E430028B21Rik	RIKEN cDNA E430028B21 gene
3.23218	F	rs13476302	1	194.514	1436546_at	3	96.7109	trans	Lix1l	Lix1-like
3.75014	F	rs13476302	1	194.514	1454868_at	4	148.569	trans	D4Ertd429e	DNA segment, Chr 4, ERATO Doi 429, expressed
4.04898	F	rs13476302	1	194.514	1418174_at	7	45.5732	trans	Dbp	D site albumin promoter binding protein
3.66658	F	rs13476302	1	194.514	1438211_s_at	7	45.5778	trans	Dbp	D site albumin promoter binding protein
3.03584	F	rs13476302	1	194.514	1419657_a_at	9	96.8846	trans	Slc25a36	solute carrier family 25, member 36
3.03078	F	rs13476302	1	194.514	1435430_at	10	77.5898	trans	Tmem1	transmembrane protein 1
4.09248	F	rs13476302	1	194.514	1452649_at	11	29.5935	trans	Rtn4	reticulon 4
3.03659	F	rs13476302	1	194.514	1428854_at	12	88.0553	trans	Tmed8	transmembrane emp24 domain containing 8
3.19531	F	rs13476302	1	194.514	1423074_at	13	55.3535	trans	Lman2	lectin, mannose-binding 2
3.03607	F	rs13476302	1	194.514	1422743_at	X	98.7172	trans	Phka1	phosphorylase kinase alpha 1
4.23674	F	rs13476302	1	194.514	1436511_at	1	182.699	cis	BC031781	cDNA sequence BC031781
4.86966	F	rs13476302	1	194.514	1423911_at	1	193.053	cis	Ppp2r5a	protein phosphatase 2, regulatory subunit B (B56), alpha isoform
4.21054	F	rs13476302	1	194.514	1428532_at	1	193.305	cis	Ints7	integrator complex subunit 7
3.00509	F	rs13476304	1	195.02	1421395_at	ambig	ambig	ambig	Zik1	zinc finger protein interacting with K protein 1
3.01317	F	rs13476304	1	195.02	1433998_at	11	71.9701	trans	4933427D14Rik	RIKEN cDNA 4933427D14 gene
3.09542	F	rs13476304	1	195.02	1423595_at	16	59.414	trans	Mina	myc induced nuclear antigen
4.06374	F	rs13476304	1	195.02	1449089_at	16	76.1724	trans	Nrip1	nuclear receptor interacting protein 1
3.76163	F	rs13476305	1	195.232	1455969_at	14	72.253	trans	Nudt15	nudix (nucleoside diphosphate linked moiety X)-type motif 15
3.23932	F	rs13476305	1	195.232	1458537_at	19	60.2479	trans	---	---
17.8065	F	rs13476305	1	195.232	1438082_at	1	193.053	cis	2310028N02Rik	RIKEN cDNA 2310028N02 gene
5.33264	F	rs13500384	1	196.922	1418964_at	1	174.213	trans	Pigm	phosphatidylinositol glycan anchor biosynthesis, class M
3.16778	F	rs13500384	1	196.922	1427406_at	12	102.235	trans	Trip11	thyroid hormone receptor interactor 11
5.18986	F	rs13500384	1	196.922	1428531_at	1	193.305	cis	Ints7	integrator complex subunit 7
3.79255	F	rs13476312	1	197.945	1424349_a_at	1	193.419	cis	Lpgat1	lysophosphatidylglycerol acyltransferase 1
3.10128	F	rs13476313	1	198.139	1429246_a_at	11	54.8344	trans	Anxa6	annexin A6
3.53999	F	rs13476313	1	198.139	1417066_at	1	182.002	cis	Cabc1	chaperone, ABC1 activity of bc1 complex like (S. pombe)
5.50682	F	rs13476316	1	199.164	1431266_at	ambig	ambig	ambig	5830433G22Rik	RIKEN cDNA 5830433G22 gene
3.01673	F	rs13476318	2	3.0473	1457672_at	8	93.9417	trans	Chd9	chromodomain helicase DNA binding protein 9
3.82679	F	rs13476318	2	3.0473	1426262_at	18	80.2884	trans	Zfp508	zinc finger protein 508
9.59375	F	rs13476318	2	3.0473	1455580_at	2	6.35914	cis	Usp6nl	USP6 N-terminal like
5.67854	F	rs13476318	2	3.0473	1440883_at	2	6.36231	cis	---	Transcribed locus
3.11561	F	c2.loc2	2	5.0473	1418963_at	2	12.2651	cis	2310047O13Rik	RIKEN cDNA 2310047O13 gene
3.00306	F	rs13476330	2	5.765	1434142_at	11	85.1625	trans	Ppm1d	protein phosphatase 1D magnesium-dependent, delta isoform
4.70627	F	c2.loc4	2	7.0473	1445161_at	2	6.36108	cis	---	---
3.27204	F	rs13476334	2	7.3134	1428927_at	6	100.539	trans	Shq1	SHQ1 homolog (S. cerevisiae)
3.23508	F	rs13476334	2	7.3134	1424830_at	12	108.627	trans	Ccnk	cyclin K
4.79683	F	rs13476334	2	7.3134	1457027_at	2	5.81337	cis	Dhtkd1	dehydrogenase E1 and transketolase domain containing 1
3.2817	F	rs3681847	2	12.07	1419202_at	2	150.262	trans	Cst7	cystatin F (leukocystatin)
3.13869	F	rs3681847	2	12.07	1419262_at	9	26.7236	trans	Acad8	acyl-Coenzyme A dehydrogenase family, member 8
3.32934	F	rs3681847	2	12.07	1437363_at	13	94.5038	trans	Homer1	homer homolog 1 (Drosophila)
3.11879	F	rs3681847	2	12.07	1426129_at	19	5.04141	trans	Brms1	breast cancer metastasis-suppressor 1
3.1655	F	rs3681847	2	12.07	1450038_s_at	X	12.2286	trans	Usp9x	ubiquitin specific peptidase 9, X chromosome
3.91801	F	c2.loc12	2	15.0473	1431792_a_at	1	75.4047	trans	Stk11ip	serine/threonine kinase 11 interacting protein
3.30082	F	c2.loc24	2	27.0473	1424412_at	1	23.3207	trans	Ogfrl1	opioid growth factor receptor-like 1
3.38224	F	c2.loc30	2	33.0473	1427729_at	ambig	ambig	ambig	Ehd2	EH-domain containing 2
4.17575	F	c2.loc30	2	33.0473	1417783_at	1	59.1068	trans	Als2	amyotrophic lateral sclerosis 2 (juvenile) homolog (human)
3.56419	F	c2.loc30	2	33.0473	1422141_s_at	1	85.0812	trans	Csprs	component of Sp100-rs
3.35471	F	c2.loc32	2	35.0473	1422994_at	1	65.121	trans	Pip5k3	phosphatidylinositol-3-phosphate/phosphatidylinositol 5-kinase, type III
4.29705	F	c2.loc34	2	37.0473	1452994_at	1	65.2097	trans	Pip5k3	phosphatidylinositol-3-phosphate/phosphatidylinositol 5-kinase, type III
3.67644	F	c2.loc36	2	39.0473	1434574_at	2	158.047	trans	9430008C03Rik	RIKEN cDNA 9430008C03 gene
4.70438	F	c2.loc38	2	41.0473	1418074_at	2	32.4091	cis	St6galnac4	ST6 (alpha-N-acetyl-neuraminyl-2,3-beta-galactosyl-1,3)-N-acetylgalactosaminide alpha-2,6-sialyltransferase 4
20.8788	F	c2.loc40	2	43.0473	1424399_at	2	32.077	cis	Uck1	uridine-cytidine kinase 1
27.0184	F	c2.loc42	2	45.0473	1424284_at	2	32.0587	cis	Pomt1	protein-O-mannosyltransferase 1
16.657	F	c2.loc42	2	45.0473	1433480_at	2	32.1008	cis	2900010J23Rik	RIKEN cDNA 2900010J23 gene
3.00968	F	rs13476501	2	53.0211	1434887_at	2	31.1152	trans	Freq	frequenin homolog (Drosophila)
3.09468	F	rs13476502	2	53.262	1423188_a_at	6	113.571	trans	6720456B07Rik	RIKEN cDNA 6720456B07 gene
13.9952	F	rs3660779	2	61.0378	1441437_at	ambig	ambig	ambig	Rbms1	RNA binding motif, single stranded interacting protein 1
3.26118	F	rs3660779	2	61.0378	1437349_at	2	91.3925	trans	Ckap5	cytoskeleton associated protein 5
3.39098	F	rs3660779	2	61.0378	1451141_at	2	70.7657	cis	Mettl8	methyltransferase like 8
4.02425	F	rs13476534	2	61.7581	1458215_at	3	95.4134	trans	Setdb1	SET domain, bifurcated 1
7.25617	F	rs4223189	2	62.1895	1457449_at	2	68.7503	cis	Lass6	Longevity assurance homolog 6 (S. cerevisiae)
3.06156	F	rs13476536	2	62.8217	1423264_at	15	76.2802	trans	Bop1	block of proliferation 1
3.42919	F	rs13476540	2	63.9624	1454828_at	2	30.9743	trans	AI790205	expressed sequence AI790205
3.23271	F	rs13476540	2	63.9624	1426533_at	2	129.966	trans	Nol5a	nucleolar protein 5A
3.24186	F	rs13476540	2	63.9624	1438614_x_at	4	108.653	trans	Osbpl9	Oxysterol binding protein-like 9
3.05142	F	rs6314726	2	64.5025	1452052_s_at	ambig	ambig	ambig	Eif3s1	eukaryotic translation initiation factor 3, subunit 1 alpha
3.03075	F	rs6314726	2	64.5025	1416660_at	19	60.8158	trans	Eif3s10	eukaryotic translation initiation factor 3, subunit 10 (theta)
4.58241	F	rs13476544	2	65.0427	1426288_at	2	91.2583	trans	Lrp4	low density lipoprotein receptor-related protein 4
27.2051	F	rs13476544	2	65.0427	1433831_at	2	70.8853	cis	4833418A01Rik	RIKEN cDNA 4833418A01 gene
3.35954	F	rs3022885	2	67.4824	1423116_at	17	34.4451	trans	Dom3z	DOM-3 homolog Z (C. elegans)
3.68871	F	rs13476562	2	70.3068	1447853_x_at	ambig	ambig	ambig	Kif13a	Kinesin family member 13A
3.26495	F	rs13476562	2	70.3068	1443877_a_at	11	54.4747	trans	Rapgef6	Rap guanine nucleotide exchange factor (GEF) 6
3.24418	F	rs13476443	2	71.79	1437389_x_at	4	129.217	trans	---	---
3.13408	F	rs13476443	2	71.79	1428440_at	2	71.0751	cis	Slc25a12	solute carrier family 25 (mitochondrial carrier, Aralar), member 12
6.02236	F	rs3670631	2	72.4246	1436440_at	ambig	ambig	ambig	B230107K20Rik	RIKEN cDNA B230107K20 gene
42.3122	F	c2.loc72	2	75.0473	1437904_at	2	76.1799	cis	Drbp1	developmentally regulated RNA binding protein 1
3.22222	F	rs13476583	2	76.3038	1427956_at	6	83.044	trans	Pcgf1	polycomb group ring finger 1
4.13977	F	rs13476583	2	76.3038	1417313_at	10	80.256	trans	Lsm7	LSM7 homolog, U6 small nuclear RNA associated (S. cerevisiae)
3.0216	F	rs13476586	2	76.9042	1443899_at	9	86.9905	trans	BC028799 /// 4922501C03Rik	cDNA sequence BC028799 /// RIKEN cDNA 4922501C03 gene
3.22555	F	rs6412631	2	77.6106	1453308_at	ambig	ambig	ambig	8430429K09Rik	RIKEN cDNA 8430429K09 gene
13.9101	F	rs6412631	2	77.6106	1423672_at	2	75.7366	cis	2510042P03Rik	RIKEN cDNA 2510042P03 gene
3.21193	F	rs6360325	2	77.8736	1427069_at	1	184.15	trans	Fbxo28	F-box protein 28
3.54282	F	rs6360325	2	77.8736	1424239_at	8	108.509	trans	2310066E14Rik	RIKEN cDNA 2310066E14 gene
13.6714	F	rs6360325	2	77.8736	1452464_a_at	2	71.2542	cis	Metapl1	methionine aminopeptidase-like 1
3.95663	F	c2.loc76	2	79.0473	1449628_s_at	2	126.99	trans	Stard7	START domain containing 7
32.7738	F	c2.loc78	2	81.0473	1438530_at	2	84.2413	cis	Tfpi	tissue factor pathway inhibitor
38.6488	F	c2.loc78	2	81.0473	1452432_at	2	84.2426	cis	Tfpi	tissue factor pathway inhibitor
20.0898	F	c2.loc80	2	83.0473	1451790_a_at	2	84.2337	cis	Tfpi	tissue factor pathway inhibitor
22.7254	F	c2.loc80	2	83.0473	1451791_at	2	84.2337	cis	Tfpi	tissue factor pathway inhibitor
3.84484	F	c2.loc82	2	85.0473	1433895_at	2	126.939	trans	Tmem127	transmembrane protein 127
3.79302	F	c2.loc82	2	85.0473	1427922_at	8	119.775	trans	2310061C15Rik	RIKEN cDNA 2310061C15 gene
5.02886	F	c2.loc84	2	87.0473	1426581_at	2	90.7116	cis	Ptpmt1	protein tyrosine phosphatase, mitochondrial 1
6.02801	F	rs13476635	2	92.111	1418747_at	2	90.8969	cis	Sfpi1	SFFV proviral integration 1
4.3551	F	rs13476635	2	92.111	1438979_s_at	2	92.184	cis	1700029I15Rik	RIKEN cDNA 1700029I15 gene
3.07393	F	rs3719272	2	92.9896	1419295_at	2	91.7832	cis	Creb3l1	cAMP responsive element binding protein 3-like 1
23.1761	F	rs3719272	2	92.9896	1452139_at	2	92.2536	cis	Slc35c1	solute carrier family 35, member C1
6.46991	F	rs13476656	2	98.2862	1449147_at	2	92.4007	cis	Chst1	carbohydrate (keratan sulfate Gal-6) sulfotransferase 1
8.48796	F	rs3689502	2	98.3447	1416429_a_at	2	103.255	cis	Cat	catalase
4.25429	F	rs13476672	2	103.147	1438278_a_at	2	77.6966	trans	BC003993	cDNA sequence BC003993
3.13254	F	rs13476672	2	103.147	1419742_at	2	130.838	trans	1700037H04Rik	RIKEN cDNA 1700037H04 gene
10.0217	F	rs13476672	2	103.147	1416430_at	2	103.255	cis	Cat	catalase
3.08918	F	c2.loc102	2	105.047	1458016_at	12	110.924	trans	---	---
3.06419	F	rs6350987	2	108.12	1434376_at	2	102.612	cis	Cd44	CD44 antigen
15.518	F	rs6350987	2	108.12	1423760_at	2	102.613	cis	Cd44	CD44 antigen
6.1439	F	rs6350987	2	108.12	1452483_a_at	2	102.615	cis	Cd44	CD44 antigen
3.61308	F	rs6350987	2	108.12	1460552_at	2	126.918	cis	Ascc3l1	activating signal cointegrator 1 complex subunit 3-like 1
7.49966	F	c2.loc106	2	109.047	1431232_a_at	ambig	ambig	ambig	Mga	MAX gene associated
3.85528	F	rs13476698	2	111.334	1436183_at	ambig	ambig	ambig	9830115L13Rik	RIKEN cDNA 9830115L13 gene
5.46377	F	rs13476698	2	111.334	1425474_a_at	2	120.008	cis	Vps39	vacuolar protein sorting 39 (yeast)
3.35132	F	rs13476704	2	113.131	1417891_at	17	24.6148	trans	Spsb3	splA/ryanodine receptor domain and SOCS box containing 3
6.84592	F	rs13476704	2	113.131	1416800_at	2	126.483	cis	Trpm7	transient receptor potential cation channel, subfamily M, member 7
3.83759	F	rs13476704	2	113.131	1431190_x_at	2	127.128	cis	Fahd2a	fumarylacetoacetate hydrolase domain containing 2A
4.49949	F	rs13476713	2	115.231	1420810_at	2	119.239	cis	1500003O03Rik	RIKEN cDNA 1500003O03 gene
7.9207	F	rs13476713	2	115.231	1430577_at	2	120.301	cis	Cep27	centrosomal protein 27
11.9165	F	rs13476713	2	115.231	1425193_at	2	126.583	cis	2010106G01Rik	RIKEN cDNA 2010106G01 gene
5.55396	F	rs13476715	2	115.613	1442112_at	ambig	ambig	ambig	Vps18	vacuolar protein sorting 18 (yeast)
7.69966	F	c2.loc114	2	117.047	1438434_at	2	113.632	cis	Arhgap11a	Rho GTPase activating protein 11A
25.0549	F	rs13476732	2	120.023	1433497_at	2	113.793	cis	Aqr	aquarius
4.13719	F	rs8281377	2	120.765	1439032_at	ambig	ambig	ambig	Cep27	centrosomal protein 27
10.6001	F	rs8281377	2	120.765	1430057_s_at	2	120.296	cis	Lrrc57	leucine rich repeat containing 57
7.85628	F	rs8281377	2	120.765	1454772_at	2	126.918	cis	Ascc3l1	activating signal cointegrator 1 complex subunit 3-like 1
17.9108	F	c2.loc120	2	123.047	1423711_at	2	119.347	cis	Ndufaf1	NADH dehydrogenase (ubiquinone) 1 alpha subcomplex, assembly factor 1
6.17346	F	c2.loc120	2	123.047	1451720_at	2	120.008	cis	Vps39	vacuolar protein sorting 39 (yeast)
8.58543	F	c2.loc120	2	123.047	1428312_at	2	120.296	cis	Lrrc57	leucine rich repeat containing 57
7.80854	F	c2.loc120	2	123.047	1454112_a_at	2	120.301	cis	Cep27	centrosomal protein 27
13.8047	F	rs13476750	2	123.91	1426584_a_at	2	121.926	cis	Sord	sorbitol dehydrogenase
3.6404	F	c2.loc122	2	125.047	1423210_a_at	2	112.063	cis	Nola3	nucleolar protein family A, member 3
6.1723	F	c2.loc122	2	125.047	1448406_at	2	125.358	cis	Cri1	CREBBP/EP300 inhibitory protein 1
3.573	F	rs6257970	2	125.385	1423211_at	2	112.063	cis	Nola3	nucleolar protein family A, member 3
3.9044	F	rs8254505	2	125.762	1458302_at	ambig	ambig	ambig	---	Transcribed locus
3.78674	F	rs8254505	2	125.762	1450011_at	2	93.8335	trans	Hsd17b12	hydroxysteroid (17-beta) dehydrogenase 12
3.68978	F	rs8254505	2	125.762	1419624_a_at	17	8.82653	trans	1700010I14Rik	RIKEN cDNA 1700010I14 gene
3.13032	F	rs8254505	2	125.762	1418568_x_at	2	118.167	cis	Srp14	signal recognition particle 14
4.3232	F	rs8254505	2	125.762	1418567_a_at	2	118.167	cis	Srp14	signal recognition particle 14
3.207	F	rs8254505	2	125.762	1427304_at	2	118.985	cis	Vps18	vacuolar protein sorting 18 (yeast)
4.39466	F	rs8254505	2	125.762	1453954_a_at	2	127.279	cis	Mrps5	mitochondrial ribosomal protein S5
3.44084	F	rs3022898	2	127.395	1429245_at	ambig	ambig	ambig	2510022D24Rik	RIKEN cDNA 2510022D24 gene
4.58623	F	rs3022898	2	127.395	1422028_a_at	9	32.4456	trans	Ets1	E26 avian leukemia oncogene 1, 5' domain
7.85499	F	rs3022898	2	127.395	1452225_at	2	126.582	cis	2010106G01Rik	RIKEN cDNA 2010106G01 gene
7.09957	F	rs3022898	2	127.395	1431002_x_at	2	127.128	cis	Fahd2a	fumarylacetoacetate hydrolase domain containing 2A
8.04387	F	rs3022898	2	127.395	1435449_at	2	127.851	cis	Bcl2l11	BCL2-like 11 (apoptosis facilitator)
4.5215	F	rs3022898	2	127.395	1432431_s_at	2	140.087	cis	2900006F19Rik	RIKEN cDNA 2900006F19 gene
4.21858	F	rs13476763	2	128.213	1431234_at	2	126.832	cis	1700041B20Rik	RIKEN cDNA 1700041B20 gene
3.02942	F	rs13476764	2	128.4	1430304_at	2	121.198	cis	Wdr76	WD repeat domain 76
4.18705	F	rs13476764	2	128.4	1453795_at	2	127.128	cis	Fahd2a	fumarylacetoacetate hydrolase domain containing 2A
18.0966	F	rs13476764	2	128.4	1456006_at	2	127.852	cis	Bcl2l11	BCL2-like 11 (apoptosis facilitator)
3.6292	F	rs13476764	2	128.4	1434443_at	2	128.302	cis	---	---
7.84951	F	rs4223486	2	130.355	1448488_at	2	127.279	cis	Mrps5	mitochondrial ribosomal protein S5
15.9347	F	rs4223486	2	130.355	1456005_a_at	2	127.852	cis	Bcl2l11	BCL2-like 11 (apoptosis facilitator)
5.68196	F	rs4223486	2	130.355	1444524_at	2	128.064	cis	---	Activated spleen cDNA, RIKEN full-length enriched library, clone:F830206P12 product:hypothetical Cytochrome c heme-binding site containing protein, full insert sequence
9.85251	F	rs4223486	2	130.355	1434444_s_at	2	128.302	cis	---	---
14.0426	F	rs4223486	2	130.355	1422869_at	2	128.39	cis	Mertk	c-mer proto-oncogene tyrosine kinase
13.364	F	rs4223486	2	130.355	1439802_at	2	129.522	cis	Stk35	serine/threonine kinase 35
4.73637	F	rs4223486	2	130.355	1422161_at	2	130.76	cis	Siglec1	sialic acid binding Ig-like lectin 1, sialoadhesin
7.55752	F	c2.loc128	2	131.047	1427668_at	2	130.764	cis	Siglec1	sialic acid binding Ig-like lectin 1, sialoadhesin
11.1801	F	c2.loc128	2	131.047	1432295_a_at	2	130.902	cis	2310035K24Rik	RIKEN cDNA 2310035K24 gene
23.7952	F	rs8264880	2	131.206	1439185_x_at	ambig	ambig	ambig	D430028G21Rik	RIKEN cDNA D430028G21 gene
3.01628	F	rs13476783	2	134.004	1444235_at	1	153.647	trans	1700025G04Rik	RIKEN cDNA 1700025G04 gene
3.21741	F	rs13476783	2	134.004	1430989_a_at	2	119.286	cis	1700020I14Rik	RIKEN cDNA 1700020I14 gene
6.41264	F	rs13476783	2	134.004	1426334_a_at	2	127.819	cis	Bcl2l11	BCL2-like 11 (apoptosis facilitator)
14.3886	F	rs13476783	2	134.004	1438824_at	2	128.892	cis	Slc20a1	solute carrier family 20, member 1
8.01301	F	rs13476783	2	134.004	1431948_a_at	2	130.954	cis	Pank2	pantothenate kinase 2 (Hallervorden-Spatz syndrome)
5.99772	F	rs13476787	2	135.282	1428704_at	ambig	ambig	ambig	Zfp661	zinc finger protein 661
4.65906	F	rs13476787	2	135.282	1441413_at	2	103.282	trans	Cat	Catalase
3.5054	F	rs13476787	2	135.282	1418365_at	9	89.8522	trans	Ctsh	cathepsin H
4.07221	F	rs13476787	2	135.282	1445191_at	2	119.211	cis	Exdl1	Vexonuclease 3'-5' domain-like 1
3.29784	F	rs13476787	2	135.282	1446807_at	2	126.424	cis	Usp8	ubiquitin specific peptidase 8
4.84543	F	rs13476787	2	135.282	1431189_a_at	2	127.128	cis	Fahd2a	fumarylacetoacetate hydrolase domain containing 2A
5.28319	F	rs13476787	2	135.282	1424268_at	2	131.183	cis	Smox	spermine oxidase
3.12358	F	rs13476790	2	135.786	1426307_at	9	86.82	trans	Cyb5r4	cytochrome b5 reductase 4
3.83002	F	rs13476791	2	136.007	1443204_at	ambig	ambig	ambig	Rbms3	RNA binding motif, single stranded interacting protein
4.19599	F	rs13476792	2	136.28	1436101_at	3	30.5795	trans	Rnf24	ring finger protein 24
3.84517	F	rs13476793	2	136.57	1418590_at	4	129.15	trans	Kpna6	karyopherin (importin) alpha 6
3.45806	F	rs13476793	2	136.57	1444150_at	4	131.22	trans	Epb4.1	erythrocyte protein band 4.1
6.13419	F	rs13476793	2	136.57	1418495_at	2	128.618	cis	Zc3h8	zinc finger CCCH type containing 8
3.9207	F	c2.loc134	2	137.047	1418044_at	18	61.2566	trans	A630042L21Rik	RIKEN cDNA A630042L21 gene
4.65657	F	rs13476805	2	139.835	1417553_at	X	49.3146	trans	Plac1	placental specific protein 1
3.10019	F	rs6251185	2	140.031	1426375_s_at	14	30.9144	trans	Oxnad1	oxidoreductase NAD-binding domain containing 1
5.65913	F	rs6251185	2	140.031	1424810_at	2	139.668	cis	Tasp1	taspase, threonine aspartase 1
3.15619	F	rs6251185	2	140.031	1434941_s_at	2	139.811	cis	2610101J03Rik	RIKEN cDNA 2610101J03 gene
7.3726	F	rs6251185	2	140.031	1434942_at	2	139.811	cis	2610101J03Rik	RIKEN cDNA 2610101J03 gene
3.08922	F	rs13476810	2	142.512	1457195_at	ambig	ambig	ambig	Plekhm1	pleckstrin homology domain containing, family M (with RUN domain) member 1
3.11494	F	rs13476810	2	142.512	1424222_s_at	ambig	ambig	ambig	Rad23b	RAD23b homolog (S. cerevisiae)
3.24061	F	rs13476810	2	142.512	1416835_s_at	ambig	ambig	ambig	Amd1 /// Amd2	S-adenosylmethionine decarboxylase 1 /// S-adenosylmethionine decarboxylase 2
3.49665	F	rs13476810	2	142.512	1450909_at	3	138.464	trans	Eif4e	eukaryotic translation initiation factor 4E
3.30936	F	rs13476810	2	142.512	1424771_at	6	136.772	trans	H2afj /// LOC632401	H2A histone family, member J /// similar to H2A histone family, member J isoform 2
4.13867	F	rs13476810	2	142.512	1435548_at	13	25	trans	Mrs2l	MRS2-like, magnesium homeostasis factor (S. cerevisiae)
3.065	F	rs13476810	2	142.512	1434783_at	15	97.7923	trans	Tmem106c	transmembrane protein 106C
3.09667	F	rs13476810	2	142.512	1454878_at	16	48.8439	trans	2310047C04Rik	RIKEN cDNA 2310047C04 gene
3.03489	F	rs13476810	2	142.512	1448437_a_at	17	45.6247	trans	Gtpbp2	GTP binding protein 2
24.2067	F	rs13476810	2	142.512	1417124_at	2	143.607	cis	Dstn	destrin
3.91253	F	rs13476810	2	142.512	1429619_a_at	2	143.962	cis	8430406I07Rik	RIKEN cDNA 8430406I07 gene
3.61832	F	rs13476810	2	142.512	1416059_at	2	144.248	cis	Sec23b	SEC23B (S. cerevisiae)
5.46889	F	rs13476810	2	142.512	1433028_at	2	148.12	cis	4833411I10Rik	RIKEN cDNA 4833411I10 gene
3.13	F	rs6195594	2	143.667	1423958_a_at	15	5.13294	trans	2900001O04Rik	RIKEN cDNA 2900001O04 gene
8.09513	F	rs6195594	2	143.667	1452422_a_at	2	142.755	cis	Snrpb2	U2 small nuclear ribonucleoprotein B
4.99891	F	rs6195594	2	143.667	1417646_a_at	2	143.942	cis	Snx5	sorting nexin 5
8.93978	F	rs6195594	2	143.667	1417648_s_at	2	143.942	cis	Snx5	sorting nexin 5
8.20826	F	rs6195594	2	143.667	1437074_at	2	143.959	cis	Snx5	sorting nexin 5
3.9127	F	rs6195594	2	143.667	1439075_at	2	144.231	cis	Polr3f	polymerase (RNA) III (DNA directed) polypeptide F
7.15022	F	c2.loc142	2	145.047	1458694_at	2	142.309	cis	AI789011	expressed sequence AI789011
3.50124	F	c2.loc144	2	147.047	1427997_at	4	24.9887	trans	1110007M04Rik	RIKEN cDNA 1110007M04 gene
10.0682	F	c2.loc144	2	147.047	1426613_a_at	2	142.754	cis	Snrpb2	U2 small nuclear ribonucleoprotein B
3.9254	F	rs13476823	2	147.979	1418941_at	18	37.6443	trans	Pcdhb22	protocadherin beta 22
3.81232	F	rs13476823	2	147.979	1435249_at	19	37.0676	trans	Btaf1	BTAF1 RNA polymerase II, B-TFIID transcription factor-associated, (Mot1 homolog, S. cerevisiae)
13.6787	F	rs13476823	2	147.979	1452131_at	2	142.754	cis	---	---
5.20375	F	rs13476823	2	147.979	1456046_at	2	148.129	cis	Cd93	CD93 antigen
4.14847	F	rs13476823	2	147.979	1423204_at	2	152.894	cis	Tm9sf4	transmembrane 9 superfamily protein member 4
26.5646	F	rs13476823	2	147.979	1423205_at	2	152.894	cis	Tm9sf4	transmembrane 9 superfamily protein member 4
5.40816	F	rs13476823	2	147.979	1422764_at	2	153.433	cis	Mapre1	microtubule-associated protein, RP/EB family, member 1
4.93132	F	rs13476824	2	148.09	1420510_at	18	52.5911	trans	---	---
3.04888	F	rs13476827	2	148.928	1454888_at	2	170.188	trans	Pfdn4	prefoldin 4
3.2027	F	rs13476827	2	148.928	1431181_a_at	17	25.9806	trans	Luc7l	Luc7 homolog (S. cerevisiae)-like
6.41653	F	rs13476827	2	148.928	1450073_at	2	152.983	cis	Kif3b	kinesin family member 3B
3.01889	F	c2.loc146	2	149.047	1426195_a_at	ambig	ambig	ambig	Cst3	cystatin C
3.99736	F	c2.loc146	2	149.047	1451040_at	2	144.291	cis	Hars2	histidyl tRNA synthetase 2
3.77371	F	rs13476830	2	149.546	1423759_a_at	1	169.145	trans	Tmco1	transmembrane and coiled-coil domains 1
3.49977	F	rs13476830	2	149.546	1419589_at	2	148.128	cis	Cd93	CD93 antigen
4.15256	F	rs13476830	2	149.546	1441907_s_at	2	148.132	cis	Cd93	CD93 antigen
4.77767	F	rs13476830	2	149.546	1428309_s_at	2	152.7	cis	Pdrg1	p53 and DNA damage regulated 1
5.5765	F	rs13476830	2	149.546	1428308_at	2	152.7	cis	Pdrg1	p53 and DNA damage regulated 1
9.76393	F	rs13476846	2	153.774	1420987_at	2	152.983	cis	Kif3b	kinesin family member 3B
8.62123	F	rs13476846	2	153.774	1428284_at	2	153.099	cis	8430427H17Rik	RIKEN cDNA 8430427H17 gene
13.0299	F	rs13476846	2	153.774	1428285_at	2	153.099	cis	8430427H17Rik	RIKEN cDNA 8430427H17 gene
6.87535	F	rs13476846	2	153.774	1456264_at	2	153.308	cis	Commd7 /// LOC631742 /// LOC674161	COMM domain containing 7 /// similar to COMM domain containing protein 7 /// similar to COMM domain-containing protein 7
12.2597	F	rs13476846	2	153.774	1426765_at	2	153.31	cis	Commd7 /// LOC631742 /// LOC674161	COMM domain containing 7 /// similar to COMM domain containing protein 7 /// similar to COMM domain-containing protein 7
24.9696	F	rs13476846	2	153.774	1450740_a_at	2	153.433	cis	Mapre1	microtubule-associated protein, RP/EB family, member 1
17.6693	F	rs13476846	2	153.774	1428820_at	2	153.461	cis	Mapre1	microtubule-associated protein, RP/EB family, member 1
3.22927	F	c2.loc152	2	155.047	1453384_at	1	140.909	trans	4632404N19Rik	RIKEN cDNA 4632404N19 gene
15.6307	F	c2.loc154	2	157.047	1448550_at	2	157.998	cis	Lbp	lipopolysaccharide binding protein
3.38797	F	rs13476868	2	158.963	1445789_at	ambig	ambig	ambig	---	0 day neonate kidney cDNA, RIKEN full-length enriched library, clone:D630046H12 product:unclassifiable, full insert sequence
3.30289	F	rs13476878	2	161.383	1443065_at	1	82.2649	trans	Rhbdd1	Rhomboid domain containing 1
4.79156	F	rs13476878	2	161.383	1431212_a_at	2	132.5	trans	3300001M20Rik	RIKEN cDNA 3300001M20 gene
3.06859	F	rs13476878	2	161.383	1428741_at	4	109.702	trans	Elavl4	ELAV (embryonic lethal, abnormal vision, Drosophila)-like 4 (Hu antigen D)
3.15703	F	rs3726342	2	162.067	1418827_at	8	36.9348	trans	Thex1	three prime histone mRNA exonuclease 1
3.01102	F	rs13476884	2	163.272	1434718_at	1	80.1439	trans	Cul3	cullin 3
3.38831	F	rs13476884	2	163.272	1451058_at	2	152.379	cis	Mcts2	malignant T cell amplified sequence 2
3.85359	F	rs13476892	2	166.01	1418955_at	ambig	ambig	ambig	Zfp93	zinc finger protein 93
3.03388	F	rs13476892	2	166.01	1428745_a_at	2	139.862	trans	2310003L22Rik	RIKEN cDNA 2310003L22 gene
3.06453	F	rs13476892	2	166.01	1431086_s_at	10	7.32787	trans	Pcmt1	protein-L-isoaspartate (D-aspartate) O-methyltransferase 1
20.8757	F	rs13476892	2	166.01	1448793_a_at	2	164.115	cis	Sdc4	syndecan 4
13.8042	F	rs13476892	2	166.01	1450057_at	2	164.148	cis	2610042O14Rik	RIKEN cDNA 2610042O14 gene
13.7921	F	c2.loc164	2	167.047	1447382_at	2	164.194	cis	Pigt	phosphatidylinositol glycan anchor biosynthesis, class T
3.50364	F	c2.loc168	2	171.047	1442387_at	ambig	ambig	ambig	Hars	Histidyl-tRNA synthetase
3.30918	F	c2.loc168	2	171.047	1435448_at	2	127.851	trans	Bcl2l11	BCL2-like 11 (apoptosis facilitator)
3.30647	F	c2.loc168	2	171.047	1437733_at	10	60.8238	trans	Eif4ebp2	eukaryotic translation initiation factor 4E binding protein 2
3.06865	F	rs13476925	2	173.7	1416555_at	9	36.5288	trans	Ei24	etoposide induced 2.4 mRNA
3.155	F	rs13476925	2	173.7	1430419_at	11	46.2838	trans	2310031A07Rik	RIKEN cDNA 2310031A07 gene
3.73738	F	rs13476925	2	173.7	1417334_at	17	34.432	trans	Stk19	serine/threonine kinase 19
4.47757	F	rs13476925	2	173.7	1449098_a_at	18	70.634	trans	Poli	polymerase (DNA directed), iota
7.18586	F	rs13476925	2	173.7	1417117_at	2	172.062	cis	Cstf1	cleavage stimulation factor, 3' pre-RNA, subunit 1
4.62827	F	rs13476928	2	174.454	1455576_at	7	28.5055	trans	5830482F20Rik	RIKEN cDNA 5830482F20 gene
3.22745	F	rs13476928	2	174.454	1455792_x_at	7	62.2286	trans	Ndn	necdin
3.76913	F	rs13476928	2	174.454	1419310_s_at	8	73.0615	trans	Rfxank	regulatory factor X-associated ankyrin-containing protein
3.1485	F	rs13476928	2	174.454	1452282_at	8	75.4232	trans	Crsp7	cofactor required for Sp1 transcriptional activation, subunit 7
3.67597	F	rs13476928	2	174.454	1435042_at	9	25.0006	trans	9130004C02Rik	RIKEN cDNA 9130004C02 gene
3.06629	F	rs13476928	2	174.454	1419654_at	9	61.1717	trans	Tle3	transducin-like enhancer of split 3, homolog of Drosophila E(spl)
4.01156	F	rs13476935	2	178.749	1436462_at	ambig	ambig	ambig	LOC626832 /// LOC628147 /// LOC668030 /// LOC668066	similar to gonadotropin inducible ovarian transcription factor 1 /// similar to zinc finger protein 709 /// similar to gonadotropin inducible ovarian transcription factor 1 /// similar to gonadotropin inducible ovarian transcription factor 1
7.14679	F	rs13476935	2	178.749	1448597_at	2	172.062	cis	Cstf1	cleavage stimulation factor, 3' pre-RNA, subunit 1
3.16308	F	rs13476936	2	179.019	1426558_x_at	ambig	ambig	ambig	3100002L24Rik /// LOC627901 /// 0610010B08Rik /// LOC628084 /// LOC628147 /// LOC668030 /// LOC668039 /// LOC668066	RIKEN cDNA 3100002L24 gene /// similar to zinc finger protein 14 /// RIKEN cDNA 0610010B08 gene /// similar to zinc finger protein 91 /// similar to zinc finger protein 709 /// similar to gonadotropin inducible ovarian transcription factor 1 /// similar to zinc finger protein 97 /// similar to gonadotropin inducible ovarian transcription factor 1
4.63316	F	rs13476936	2	179.019	1432651_at	ambig	ambig	ambig	2510019K15Rik	RIKEN cDNA 2510019K15 gene
3.10638	F	rs13476936	2	179.019	1422512_a_at	2	180.519	cis	Ogfr	opioid growth factor receptor
5.67907	F	rs13476938	2	179.385	1455155_at	2	179.964	cis	Lsm14b	LSM14 homolog B (SCD6, S. cerevisiae)
4.28144	F	rs13476938	2	179.385	1419263_a_at	2	180.101	cis	Adrm1	adhesion regulating molecule 1
6.67167	F	rs13476938	2	179.385	1422511_a_at	2	180.519	cis	Ogfr	opioid growth factor receptor
23.1809	F	rs13476938	2	179.385	1451735_at	2	181.288	cis	Arfrp1	ADP-ribosylation factor related protein 1
4.12061	F	rs3022948	3	7.5163	1419624_a_at	17	8.82653	trans	1700010I14Rik	RIKEN cDNA 1700010I14 gene
14.0257	F	rs8246929	3	10.3188	1453144_at	ambig	ambig	ambig	4933439C20Rik	RIKEN cDNA 4933439C20 gene
16.7979	F	rs8246929	3	10.3188	1453145_at	ambig	ambig	ambig	4933439C20Rik	RIKEN cDNA 4933439C20 gene
3.23851	F	rs8246929	3	10.3188	1454072_at	5	136.898	trans	4731417B20Rik	RIKEN cDNA 4731417B20 gene
3.23922	F	rs8246929	3	10.3188	1439326_at	17	17.2744	trans	Lnpep	leucyl/cystinyl aminopeptidase
5.65175	F	rs8246929	3	10.3188	1417848_at	3	9.41008	cis	Zfp704	zinc finger protein 704
14.5876	F	rs3693600	3	12.6796	1434493_at	3	14.583	cis	1810022K09Rik	RIKEN cDNA 1810022K09 gene
5.0506	F	rs3716641	3	12.681	1428950_s_at	13	49.6732	trans	Nol8	nucleolar protein 8
9.16745	F	rs3716641	3	12.681	1458683_at	3	16.0234	cis	Sirpb1 /// LOC673172	signal-regulatory protein beta 1 /// similar to SIRP beta 1 isoform 1
11.0382	F	rs3716641	3	12.681	1451638_s_at	3	19.3243	cis	Armc1 /// LOC634390	armadillo repeat containing 1 /// similar to armadillo repeat-containing protein
3.05187	F	rs3022949	3	14.8192	1447894_x_at	ambig	ambig	ambig	Vps52 /// LOC631721	vacuolar protein sorting 52 (yeast) /// similar to vacuolar protein sorting 52
3.76091	F	rs3022949	3	14.8192	1444465_at	ambig	ambig	ambig	Ube4b	Ubiquitination factor E4B, UFD2 homolog (S. cerevisiae)
3.19203	F	rs3022949	3	14.8192	1443988_at	2	155.845	trans	B330012G18Rik	RIKEN cDNA B330012G18 gene
4.56039	F	rs3022949	3	14.8192	1429362_a_at	19	5.28397	trans	Sf3b2	splicing factor 3b, subunit 2
6.03441	F	rs3022949	3	14.8192	1448752_at	3	14.8631	cis	Car2	carbonic anhydrase 2
3.50874	F	rs13476987	3	15.5803	1447503_at	19	18.7192	trans	BC016495	CDNA sequence BC016495
3.95538	F	rs13476993	3	16.9654	1418462_at	3	36.7442	cis	Exosc9	exosome component 9
3.65333	F	rs13476995	3	17.3597	1439463_x_at	ambig	ambig	ambig	Hmgb1 /// LOC434174 /// LOC545555 /// LOC623634 /// LOC637733 /// LOC640060 /// LOC666836 /// LOC669546 /// LOC669692 /// LOC671507 /// LOC677578	high mobility group box 1 /// similar to High mobility group protein 1 (HMG-1) (High mobility group protein B1) (Amphoterin) (Heparin-binding protein p30) /// similar to High mobility group protein 1 (HMG-1) (High mobility group protein B1) (Amphoterin) (Heparin-binding protein p30) /// similar to High mobility group protein 1 (HMG-1) (High mobility group protein B1) (Amphoterin) (Heparin-binding…
4.40264	F	rs13476995	3	17.3597	1445235_at	ambig	ambig	ambig	Ythdf3	YTH domain family 3
3.30464	F	rs13476995	3	17.3597	1429762_a_at	2	69.448	trans	Bbs5	Bardet-Biedl syndrome 5 (human)
4.27994	F	rs13476995	3	17.3597	1452693_at	2	158.486	trans	Dhx35	DEAH (Asp-Glu-Ala-His) box polypeptide 35
3.08716	F	rs13476995	3	17.3597	1427916_at	3	104.993	trans	St7l	suppression of tumorigenicity 7-like
3.01051	F	rs13476995	3	17.3597	1427147_at	4	24.665	trans	F730047E07Rik	RIKEN cDNA F730047E07 gene
3.52187	F	rs13476995	3	17.3597	1417467_a_at	6	113.332	trans	Tada3l	transcriptional adaptor 3 (NGG1 homolog, yeast)-like
3.26731	F	rs13476995	3	17.3597	1427713_x_at	7	24.8014	trans	Pou2f2	POU domain, class 2, transcription factor 2
3.7675	F	rs13476995	3	17.3597	1427725_a_at	7	24.8014	trans	Pou2f2	POU domain, class 2, transcription factor 2
3.15883	F	rs13476995	3	17.3597	1416410_at	7	25.0038	trans	Pafah1b3	platelet-activating factor acetylhydrolase, isoform 1b, alpha1 subunit
3.2744	F	rs13476995	3	17.3597	1424015_at	7	109.685	trans	Rab6ip1	Rab6 interacting protein 1
3.0264	F	rs13476995	3	17.3597	1434225_at	7	110.074	trans	Swap70	SWA-70 protein
3.02324	F	rs13476995	3	17.3597	1460001_at	8	73.5781	trans	Pgpep1	pyroglutamyl-peptidase I
3.89755	F	rs13476995	3	17.3597	1450510_a_at	8	87.3057	trans	Cacna1a	calcium channel, voltage-dependent, P/Q type, alpha 1A subunit
4.56095	F	rs13476995	3	17.3597	1453110_at	10	98.5372	trans	Wdr51b	WD repeat domain 51B
3.4684	F	rs13476995	3	17.3597	1422801_at	11	55.3131	trans	RP23-336J1.4	Ras-GTPase-activating protein SH3-domain binding protein
3.24894	F	rs13476995	3	17.3597	1420984_at	11	89.7995	trans	Pctp	phosphatidylcholine transfer protein
4.38351	F	rs13476995	3	17.3597	1428473_at	14	19.2879	trans	Ppp3cb	protein phosphatase 3, catalytic subunit, beta isoform
3.02279	F	rs13476995	3	17.3597	1420522_at	16	27.3043	trans	Ccdc50	coiled-coil domain containing 50
3.59559	F	rs13476995	3	17.3597	1448939_at	16	76.8963	trans	Usp25	ubiquitin specific peptidase 25
3.04915	F	rs13476995	3	17.3597	1422864_at	16	92.4918	trans	Runx1	runt related transcription factor 1
3.32192	F	rs13476995	3	17.3597	1455719_at	17	35.442	trans	Tubb5	tubulin, beta 5
3.10417	F	rs13476995	3	17.3597	1428416_at	3	7.48656	cis	3110050N22Rik	RIKEN cDNA 3110050N22 gene
3.92693	F	rs13476995	3	17.3597	1417444_at	3	14.5554	cis	E2f5	E2F transcription factor 5
3.6614	F	rs13459167	3	19.0647	1448337_at	2	155.538	trans	2410003P15Rik	RIKEN cDNA 2410003P15 gene
3.00181	F	rs13459167	3	19.0647	1422459_a_at	7	140.734	trans	Psmd13	proteasome (prosome, macropain) 26S subunit, non-ATPase, 13
3.54122	F	rs13459167	3	19.0647	1417035_at	19	6.116	trans	Sac3d1	SAC3 domain containing 1
8.12207	F	rs13459167	3	19.0647	1415719_s_at	3	19.3243	cis	Armc1	armadillo repeat containing 1
3.41041	F	rs13477004	3	19.5793	1446533_at	8	73.3304	trans	Crtc1	CREB regulated transcription coactivator 1
3.08076	F	rs13477004	3	19.5793	1418731_at	X	100.164	trans	Rnf12	ring finger protein 12
3.30429	F	c3.loc14	3	21.5163	1449615_s_at	1	95.2614	trans	Hdlbp	high density lipoprotein (HDL) binding protein
4.10467	F	c3.loc14	3	21.5163	1416032_at	19	10.9377	trans	Tmem109	transmembrane protein 109
3.21264	F	c3.loc16	3	23.5163	1452852_at	ambig	ambig	ambig	Twistnb	TWIST neighbor
3.23649	F	c3.loc18	3	25.5163	1435225_s_at	17	28.5645	trans	Brpf3	bromodomain and PHD finger containing, 3
3.97893	F	rs13477025	3	27.0855	1449046_a_at	7	44.3361	trans	Josd2	Josephin domain containing 2
3.5238	F	c3.loc22	3	29.5163	1422521_at	6	83.1482	trans	Dctn1	dynactin 1
3.08468	F	rs13477036	3	30.6251	1432296_a_at	2	83.5253	trans	Itgav	integrin alpha V
6.75349	F	c3.loc26	3	33.5163	1452079_s_at	ambig	ambig	ambig	Dcun1d1	DCUN1D1 DCN1, defective in cullin neddylation 1, domain containing 1 (S. cerevisiae)
3.43717	F	c3.loc28	3	35.5163	1436793_at	1	6.81785	trans	St18	suppression of tumorigenicity 18
3.06669	F	rs13477059	3	36.7375	1419611_at	3	20.087	cis	---	---
9.72347	F	rs13477059	3	36.7375	1429581_at	3	36.2576	cis	Acad9	acyl-Coenzyme A dehydrogenase family, member 9
23.0119	F	c3.loc30	3	37.5163	1417227_at	3	36.1509	cis	Mccc1	methylcrotonoyl-Coenzyme A carboxylase 1 (alpha)
3.13415	F	rs3140619	3	38.073	1441160_at	ambig	ambig	ambig	D330050G23Rik	RIKEN cDNA D330050G23 gene
3.17938	F	rs3140619	3	38.073	1460110_at	ambig	ambig	ambig	Rttn	rotatin
3.70197	F	rs3140619	3	38.073	1434824_at	5	135.529	trans	Baz1b	bromodomain adjacent to zinc finger domain, 1B
3.41199	F	rs3140619	3	38.073	1428901_at	18	49.8228	trans	Dtwd2	DTW domain containing 2
3.45502	F	rs3140619	3	38.073	1428576_at	19	44.6248	trans	Hif1an	hypoxia-inducible factor 1, alpha subunit inhibitor
3.06899	F	rs3140619	3	38.073	1449589_x_at	X	33.5582	trans	2610020O08Rik	RIKEN cDNA 2610020O08 gene
3.21399	F	rs3140619	3	38.073	1438412_at	3	41.7018	cis	---	---
3.30354	F	rs13477071	3	41.1058	1435732_x_at	6	37.7364	trans	Atp6v0c	ATPase, H+ transporting, lysosomal V0 subunit C
3.09379	F	rs13477071	3	41.1058	1453263_at	13	59.5949	trans	Mak10	MAK10 homolog, amino-acid N-acetyltransferase subunit, (S. cerevisiae)
4.01014	F	rs13477078	3	43.3095	1440590_at	2	6.32514	trans	---	---
3.01516	F	rs13477079	3	43.6051	1428364_at	3	95.2151	trans	Scnm1	sodium channel modifier 1
3.20308	F	rs13477079	3	43.6051	1427630_x_at	7	25.1721	trans	Ceacam1	CEA-related cell adhesion molecule 1
5.90074	F	rs13477079	3	43.6051	1425567_a_at	3	36.6405	cis	Anxa5	annexin A5
3.12541	F	c3.loc38	3	45.5163	1441856_x_at	10	61.0978	trans	Tysnd1	trypsin domain containing 1
3.01	F	c3.loc38	3	45.5163	1422497_at	13	101.903	trans	Slc30a5	solute carrier family 30 (zinc transporter), member 5
3.45727	F	c3.loc38	3	45.5163	1456630_x_at	16	91.5515	trans	Son	Son cell proliferation protein
11.6686	F	c3.loc38	3	45.5163	1426753_at	3	41.71	cis	Phf17	PHD finger protein 17
3.07563	F	c3.loc38	3	45.5163	1418210_at	3	57.9298	cis	Pfn2	profilin 2
3.00094	F	c3.loc40	3	47.5163	1424554_at	4	132.099	trans	Ppp1r8	protein phosphatase 1, regulatory (inhibitor) subunit 8
3.23905	F	c3.loc40	3	47.5163	1426631_at	5	23.2525	trans	Pus7	pseudouridylate synthase 7 homolog (S. cerevisiae)
3.03359	F	c3.loc40	3	47.5163	1427099_at	7	126.813	trans	Maz	MYC-associated zinc finger protein (purine-binding transcription factor)
3.00707	F	c3.loc40	3	47.5163	1460716_a_at	8	108.06	trans	Cbfb	core binding factor beta
3.03275	F	c3.loc40	3	47.5163	1447534_at	10	62.0532	trans	---	---
3.50154	F	c3.loc40	3	47.5163	1460613_x_at	11	106.116	trans	Gh	growth hormone
3.48341	F	c3.loc40	3	47.5163	1455436_at	13	52.5168	trans	Diras2	DIRAS family, GTP-binding RAS-like 2
3.15646	F	c3.loc40	3	47.5163	1418209_a_at	3	57.9298	cis	Pfn2	profilin 2
3.23315	F	c3.loc42	3	49.5163	1424640_at	1	136.963	trans	Arl8a	ADP-ribosylation factor-like 8A
3.19085	F	c3.loc42	3	49.5163	1450130_at	1	157.042	trans	Xpr1	xenotropic and polytropic retrovirus receptor 1
3.16086	F	c3.loc42	3	49.5163	1438958_x_at	2	151.253	trans	Fkbp1a	FK506 binding protein 1a
3.16035	F	c3.loc42	3	49.5163	1434659_at	6	56.6895	trans	5830411G16Rik	RIKEN cDNA 5830411G16 gene
4.08007	F	c3.loc42	3	49.5163	1434675_at	17	32.7554	trans	1700065O13Rik	RIKEN cDNA 1700065O13 gene
3.02087	F	c3.loc44	3	51.5163	1426471_at	ambig	ambig	ambig	Zfp52	zinc finger protein 52
3.29958	F	c3.loc44	3	51.5163	1434325_x_at	ambig	ambig	ambig	Prkar1b	protein kinase, cAMP dependent regulatory, type I beta
3.08109	F	c3.loc44	3	51.5163	1460634_at	2	28.3351	trans	Ralgds	ral guanine nucleotide dissociation stimulator
3.02232	F	c3.loc44	3	51.5163	1427604_a_at	2	168.326	trans	Atp9a	ATPase, class II, type 9A
3.68958	F	c3.loc44	3	51.5163	1415859_at	7	126.338	trans	Eif3s8	eukaryotic translation initiation factor 3, subunit 8
3.08709	F	c3.loc44	3	51.5163	1452309_at	9	71.4251	trans	Cgnl1 /// LOC677485	cingulin-like 1 /// similar to cingulin-like 1 isoform 1
3.53342	F	c3.loc44	3	51.5163	1431299_a_at	17	35.4767	trans	2310014H01Rik	RIKEN cDNA 2310014H01 gene
3.69374	F	c3.loc44	3	51.5163	1416838_at	17	40.3982	trans	Mut	methylmalonyl-Coenzyme A mutase
3.31782	F	c3.loc44	3	51.5163	1426227_s_at	19	10.7558	trans	Vps37c	vacuolar protein sorting 37C (yeast)
3.63617	F	c3.loc44	3	51.5163	1449538_a_at	19	17.3957	trans	Gcnt1 /// LOC635918	glucosaminyl (N-acetyl) transferase 1, core 2 /// similar to glucosaminyl (N-acetyl) transferase 1, core 2
4.08738	F	c3.loc46	3	53.5163	1450170_x_at	17	34.8711	trans	H2-K1	Histocompatibility 2, K1, K region
3.23524	F	rs13477110	3	53.9118	1443872_at	ambig	ambig	ambig	2007-03-02	Membrane-associated ring finger (C3HC4) 2
4.85724	F	rs13477110	3	53.9118	1442364_at	ambig	ambig	ambig	Mapk14	Mitogen activated protein kinase 14
3.71638	F	rs13477110	3	53.9118	1421043_s_at	3	88.7067	trans	Arhgef2	rho/rac guanine nucleotide exchange factor (GEF) 2
3.54666	F	rs13477110	3	53.9118	1428776_at	5	103.846	trans	Slc10a6	solute carrier family 10 (sodium/bile acid cotransporter family), member 6
3.44217	F	rs13477110	3	53.9118	1451752_at	5	142.654	trans	Foxk1	forkhead box K1
3.15731	F	rs13477110	3	53.9118	1415789_a_at	11	44.298	trans	Ublcp1 /// LOC665689	ubiquitin-like domain containing CTD phosphatase 1 /// similar to ubiquitin-like domain containing CTD phosphatase 1
3.03259	F	rs13477110	3	53.9118	1456904_at	11	97.0041	trans	---	Transcribed locus
3.80832	F	rs13477110	3	53.9118	1453864_at	12	10.4168	trans	Rdh14	retinol dehydrogenase 14 (all-trans and 9-cis)
3.16369	F	rs13477110	3	53.9118	1416505_at	15	101.095	trans	Nr4a1	nuclear receptor subfamily 4, group A, member 1
4.29342	F	rs13477110	3	53.9118	1435872_at	17	29.2227	trans	---	Transcribed locus
3.69048	F	rs13477110	3	53.9118	1440886_at	19	29.0915	trans	Cdc37l1	cell division cycle 37 homolog (S. cerevisiae)-like 1
3.00663	F	rs3685081	3	54.1121	1437043_a_at	ambig	ambig	ambig	1110012M11Rik	RIKEN cDNA 1110012M11 gene
3.24046	F	rs3685081	3	54.1121	1457185_at	ambig	ambig	ambig	---	---
3.58038	F	rs3685081	3	54.1121	1439253_x_at	ambig	ambig	ambig	2610524G07Rik	RIKEN cDNA 2610524G07 gene
3.91465	F	rs3685081	3	54.1121	1446955_at	ambig	ambig	ambig	Nr2c2	Nuclear receptor subfamily 2, group C, member 2
4.89733	F	rs3685081	3	54.1121	1425060_s_at	5	123.84	trans	Rsn	restin (Reed-Steinberg cell-expressed intermediate filament-associated protein)
4.24675	F	rs3685081	3	54.1121	1436595_at	8	129.833	trans	Rbm34	RNA binding motif protein 34
3.17426	F	rs3685081	3	54.1121	1450695_at	12	36.083	trans	Ahr	aryl-hydrocarbon receptor
4.04356	F	rs3685081	3	54.1121	1460024_at	15	80.7589	trans	Tnrc6b	trinucleotide repeat containing 6b
3.10716	F	rs3685081	3	54.1121	1438207_at	19	46.3141	trans	Gbf1	golgi-specific brefeldin A-resistance factor 1
3.0185	F	rs3685081	3	54.1121	1418109_at	X	90.8888	trans	Gspt2	G1 to S phase transition 2
3.52382	F	rs13477115	3	55.0464	1448095_at	ambig	ambig	ambig	---	Transcribed locus
3.36505	F	rs13477115	3	55.0464	1435935_at	5	118.526	trans	---	Transcribed locus
3.81512	F	c3.loc48	3	55.5163	1451102_at	11	57.9202	trans	Cnot8	CCR4-NOT transcription complex, subunit 8
4.41169	F	c3.loc50	3	57.5163	1458656_at	7	46.8763	trans	AW050198	expressed sequence AW050198
3.26071	F	c3.loc50	3	57.5163	1435170_at	X	146.428	trans	Tsr2	TSR2, 20S rRNA accumulation, homolog (S. cerevisiae)
12.6009	F	c3.loc50	3	57.5163	1448885_at	3	61.4525	cis	Rap2b	RAP2B, member of RAS oncogene family
3.69288	F	rs4223977	3	58.8452	1432094_a_at	6	3.521	trans	1700034M03Rik	RIKEN cDNA 1700034M03 gene
3.61094	F	rs13477130	3	59.2225	1428969_at	18	20.9602	trans	D030074E01Rik	RIKEN cDNA D030074E01 gene
3.47941	F	rs13477130	3	59.2225	1451074_at	3	57.8241	cis	Rnf13	ring finger protein 13
3.36013	F	c3.loc56	3	63.5163	1452160_at	3	65.6163	cis	Tiparp	TCDD-inducible poly(ADP-ribose) polymerase
3.34137	F	rs13477166	3	68.0279	1452932_at	10	80.5482	trans	Zbtb7a	zinc finger and BTB domain containing 7a
3.01615	F	rs13477166	3	68.0279	1437080_s_at	11	80.2866	trans	Psmd11 /// LOC627316 /// LOC671671	proteasome (prosome, macropain) 26S subunit, non-ATPase, 11 /// similar to 26S proteasome non-ATPase regulatory subunit 11 (26S proteasome regulatory subunit S9) (26S proteasome regulatory subunit p44.5) /// similar to 26S proteasome non-ATPase regulatory subunit 11 (26S proteasome regulatory subunit S9) (26S proteasome regulatory subunit p44.5)
3.75258	F	rs13477166	3	68.0279	1424875_at	3	55.2001	cis	Spg20	spastic paraplegia 20, spartin (Troyer syndrome) homolog (human)
3.59402	F	c3.loc62	3	69.5163	1439521_at	ambig	ambig	ambig	---	Adult male aorta and vein cDNA, RIKEN full-length enriched library, clone:A530001O10 product:unclassifiable, full insert sequence
3.06872	F	c3.loc64	3	71.5163	1441725_at	2	29.0671	trans	6530402F18Rik	RIKEN cDNA 6530402F18 gene
3.05901	F	rs13477194	3	75.4759	1422621_at	10	57.842	trans	Ranbp2	RAN binding protein 2
3.35047	F	c3.loc68	3	75.5163	1441460_at	ambig	ambig	ambig	Fgfr1op2	FGFR1 oncogene partner 2
3.07559	F	rs8273648	3	77.2547	1436594_at	ambig	ambig	ambig	Zfp719	zinc finger protein 719
3.15316	F	rs8273648	3	77.2547	1454970_at	5	145.401	trans	---	---
3.8547	F	rs8273648	3	77.2547	1430756_at	10	42.9086	trans	5430427G11Rik	RIKEN cDNA 5430427G11 gene
3.00904	F	rs8273648	3	77.2547	1419744_at	17	33.7559	trans	H2-DMb2	histocompatibility 2, class II, locus Mb2
3.10033	F	rs8273648	3	77.2547	1431113_at	19	4.75924	trans	Rbm4b	RNA binding motif protein 4B
3.01768	F	c3.loc74	3	81.5163	1438548_x_at	11	5.00559	trans	Rhbdd3	rhomboid domain containing 3
5.28082	F	c3.loc74	3	81.5163	1430955_at	3	88.7717	cis	2810403A07Rik	RIKEN cDNA 2810403A07 gene
4.67232	F	c3.loc76	3	83.5163	1450848_at	3	89.0094	cis	Dap3	death associated protein 3
3.08144	F	c3.loc76	3	83.5163	1430976_a_at	3	94.5287	cis	Mrpl9	mitochondrial ribosomal protein L9
8.60868	F	c3.loc78	3	85.5163	1435155_at	3	94.8455	cis	Cgn	cingulin
7.02119	F	c3.loc80	3	87.5163	1416689_at	3	94.6982	cis	Tuft1	tuftelin 1
3.04256	F	c3.loc82	3	89.5163	1445581_at	ambig	ambig	ambig	---	---
3.62857	F	c3.loc82	3	89.5163	1436471_at	10	74.4978	trans	Rab36	RAB36, member RAS oncogene family
3.08907	F	c3.loc82	3	89.5163	1423369_at	X	64.9392	trans	Fmr1	fragile X mental retardation syndrome 1 homolog
17.0543	F	c3.loc82	3	89.5163	1428710_at	3	88.8028	cis	Rit1	Ras-like without CAAX 1
37.9525	F	rs6293667	3	90.7867	1431314_a_at	3	88.9069	cis	5830417I10Rik	RIKEN cDNA 5830417I10 gene
4.69807	F	rs6293667	3	90.7867	1422853_at	3	89.5045	cis	Shc1	src homology 2 domain-containing transforming protein C1
4.94628	F	rs6293667	3	90.7867	1415756_a_at	3	90.5739	cis	Snapap	SNAP-associated protein
9.14102	F	rs6293667	3	90.7867	1427297_at	3	94.5287	cis	Mrpl9	mitochondrial ribosomal protein L9
3.24823	F	c3.loc92	3	99.5163	1436385_at	ambig	ambig	ambig	Ganc	glucosidase, alpha; neutral C
8.66973	F	c3.loc92	3	99.5163	1437749_s_at	ambig	ambig	ambig	Mrpl9	mitochondrial ribosomal protein L9
3.47518	F	c3.loc92	3	99.5163	1427460_at	2	179.842	trans	Taf4a	TAF4A RNA polymerase II, TATA box binding protein (TBP)-associated factor
5.40414	F	rs13477282	3	101.534	1454714_x_at	7	136.651	trans	Phgdh /// LOC668771 /// LOC670155 /// LOC671972 /// LOC673015	3-phosphoglycerate dehydrogenase /// similar to 3-phosphoglycerate dehydrogenase /// similar to 3-phosphoglycerate dehydrogenase /// similar to 3-phosphoglycerate dehydrogenase /// similar to 3-phosphoglycerate dehydrogenase
3.1203	F	rs13477282	3	101.534	1429888_a_at	9	50.5033	trans	Hspb2	heat shock protein 2
8.58741	F	rs13477282	3	101.534	1426578_s_at	3	90.5739	cis	Snapap	SNAP-associated protein
3.27641	F	rs4224133	3	103.975	1451522_s_at	5	137.859	trans	Lrch4	leucine-rich repeats and calponin homology (CH) domain containing 4
3.33473	F	rs4224133	3	103.975	1452787_a_at	7	44.8446	trans	Prmt1	protein arginine N-methyltransferase 1
8.19549	F	rs4224133	3	103.975	1422854_at	3	89.5045	cis	Shc1	src homology 2 domain-containing transforming protein C1
4.76081	F	rs13477301	3	106.246	1428522_at	3	101.068	cis	Ttf2	transcription termination factor, RNA polymerase II
3.68804	F	rs13477302	3	106.57	1436069_at	1	95.6512	trans	Ing5	inhibitor of growth family, member 5
3.16514	F	rs13477302	3	106.57	1458365_at	1	165.223	trans	Scyl1bp1	SCY1-like 1 binding protein 1
3.45518	F	rs13477302	3	106.57	1451685_at	11	97.4796	trans	Mllt6 /// LOC639490 /// LOC669933	myeloid/lymphoid or mixed lineage-leukemia translocation to 6 homolog (Drosophila) /// similar to myeloid/lymphoid or mixed lineage-leukemia translocation to 6 homolog /// similar to myeloid/lymphoid or mixed lineage-leukemia translocation to 6 homolog
6.14938	F	rs13477302	3	106.57	1423653_at	3	101.705	cis	Atp1a1	ATPase, Na+/K+ transporting, alpha 1 polypeptide
5.80965	F	rs13477302	3	106.57	1427234_at	3	102.286	cis	Vangl1	vang-like 1 (van gogh, Drosophila)
7.87332	F	rs6339990	3	106.778	1452818_at	3	101.068	cis	Ttf2	transcription termination factor, RNA polymerase II
4.14049	F	c3.loc100	3	107.516	1451390_s_at	1	75.0519	trans	Zfand2b	zinc finger, AN1 type domain 2B
3.24381	F	c3.loc100	3	107.516	1442644_at	18	83.1904	trans	---	PREDICTED: Mus musculus hypothetical protein LOC622030 (LOC622030), mRNA
4.04332	F	rs13477307	3	107.667	1424424_at	ambig	ambig	ambig	Slc39a1	solute carrier family 39 (zinc transporter), member 1
8.07162	F	rs13477307	3	107.667	1436958_x_at	ambig	ambig	ambig	Tpm3	Tropomyosin 3, gamma
3.45262	F	rs13477307	3	107.667	1440152_x_at	2	25.3826	trans	Edf1 /// LOC665181 /// LOC671865 /// LOC674653	endothelial differentiation-related factor 1 /// similar to Endothelial differentiation-related factor 1 (EDF-1) (Multiprotein bridging factor 1) (MBF1) (Calmodulin-associated peptide 19) (CAP-19) /// similar to Endothelial differentiation-related factor 1 (EDF-1) (Multiprotein bridging factor 1) (MBF1) (Calmodulin-associated peptide 19) (CAP-19) /// similar to Endothelial differentiation-related…
4.30658	F	rs13477307	3	107.667	1418628_at	4	129.216	trans	Khdrbs1	KH domain containing, RNA binding, signal transduction associated 1
8.56805	F	rs13477307	3	107.667	1420540_a_at	3	88.8028	cis	Rit1	Ras-like without CAAX 1
3.18097	F	c3.loc106	3	113.516	1417545_at	5	114.883	trans	Trpv4	transient receptor potential cation channel, subfamily V, member 4
3.64865	F	c3.loc106	3	113.516	1426427_at	15	83.3117	trans	Ttll1	tubulin tyrosine ligase-like 1
3.48816	F	c3.loc108	3	115.516	1440766_at	ambig	ambig	ambig	Gnl3	Guanine nucleotide binding protein-like 3 (nucleolar)
3.06488	F	c3.loc108	3	115.516	1427067_at	11	60.2339	trans	4933439F18Rik	RIKEN cDNA 4933439F18 gene
9.25924	F	c3.loc108	3	115.516	1418234_s_at	3	103.301	cis	Bcas2	breast carcinoma amplified sequence 2
8.98218	F	c3.loc108	3	115.516	1416631_at	3	103.939	cis	Ap4b1	adaptor-related protein complex AP-4, beta 1
3.27762	F	c3.loc112	3	119.516	1426567_a_at	18	80.4154	trans	Pqlc1	PQ loop repeat containing 1
5.19462	F	c3.loc112	3	119.516	1460118_at	3	122.848	cis	---	Transcribed locus
3.17063	F	rs13477361	3	120.9	1455116_at	ambig	ambig	ambig	Tnfrsf19l /// LOC671976	tumor necrosis factor receptor superfamily, member 19-like /// similar to GrpE protein homolog 2, mitochondrial precursor (Mt-GrpE#2)
3.37312	F	rs13477361	3	120.9	1430586_at	2	106.768	trans	2700007P21Rik	RIKEN cDNA 2700007P21 gene
3.41235	F	rs13477361	3	120.9	1455215_at	6	124.968	trans	C530028O21Rik	RIKEN cDNA C530028O21 gene
3.69126	F	rs13477361	3	120.9	1437114_at	17	26.4994	trans	A930001N09Rik	RIKEN cDNA A930001N09 gene
4.90905	F	rs13477361	3	120.9	1455970_at	3	122.85	cis	Pde5a	Phosphodiesterase 5A, cGMP-specific
3.21727	F	rs13477366	3	122.475	1447205_x_at	ambig	ambig	ambig	Rps12 /// LOC432865 /// LOC434843 /// LOC546371 /// LOC626048 /// LOC627835 /// LOC665463 /// LOC665501 /// LOC665522 /// LOC665555 /// LOC665579 /// LOC665611 /// LOC668354 /// LOC670751 /// LOC670832 /// LOC671641 /// LOC672008 /// LOC672415 /// LOC673522 /// LOC676277	ribosomal protein S12 /// similar to ribosomal protein S12 /// similar to ribosomal protein S12 /// similar to ribosomal protein S12 /// similar to ribosomal protein S12 /// similar to ribosomal protein S12 /// similar to ribosomal protein S12 /// similar to ribosomal protein S12 /// similar to ribosomal protein S12 /// similar to ribosomal protein S12 /// similar to ribosomal protein S12 /// sim…
3.37154	F	rs13477366	3	122.475	1427843_at	ambig	ambig	ambig	AI840826	expressed sequence AI840826
3.57402	F	rs13477366	3	122.475	1441831_x_at	ambig	ambig	ambig	Clcn5	Chloride channel 5
3.73001	F	rs13477366	3	122.475	1457375_at	ambig	ambig	ambig	---	PREDICTED: Mus musculus hypothetical protein LOC627707 (LOC627707), mRNA
6.19887	F	rs13477366	3	122.475	1438102_at	ambig	ambig	ambig	Senp8	SUMO/sentrin specific peptidase 8
3.22219	F	rs13477366	3	122.475	1460355_at	9	46.034	trans	Bud13	BUD13 homolog (yeast)
3.37746	F	rs13477366	3	122.475	1453744_a_at	11	94.1441	trans	Ankrd40	ankyrin repeat domain 40
3.00499	F	rs13477366	3	122.475	1437449_at	11	94.3559	trans	Rsad1	radical S-adenosyl methionine domain containing 1
3.25003	F	rs13477366	3	122.475	1424902_at	11	97.7393	trans	Plxdc1	plexin domain containing 1
3.85315	F	c3.loc116	3	123.516	1427106_at	19	8.86956	trans	Zbtb3	zinc finger and BTB domain containing 3
3.37311	F	rs6376227	3	125.125	1429070_at	2	32.2768	trans	4933440H19Rik	RIKEN cDNA 4933440H19 gene
3.17174	F	rs6376227	3	125.125	1427650_a_at	16	92.4944	trans	Runx1	runt related transcription factor 1
9.75913	F	rs6376227	3	125.125	1451809_s_at	3	121.147	cis	Rwdd3	RWD domain containing 3
33.9076	F	rs6376227	3	125.125	1416679_at	3	121.751	cis	Abcd3	ATP-binding cassette, sub-family D (ALD), member 3
3.40798	F	rs6200560	3	125.511	1427230_at	4	154.539	trans	B930041F14Rik	RIKEN cDNA B930041F14 gene
3.27094	F	c3.loc118	3	125.516	1419923_at	ambig	ambig	ambig	LOC626391	Similar to Zinc finger protein 124 (HZF-16)
4.3421	F	c3.loc118	3	125.516	1437645_at	15	102.362	trans	Atf7	activating transcription factor 7
3.82179	F	rs13477379	3	126.267	1436317_at	1	54.4195	trans	D230012E17Rik	RIKEN cDNA D230012E17 gene
3.00491	F	rs13477379	3	126.267	1433760_a_at	11	5.00433	trans	Rhbdd3	rhomboid domain containing 3
3.30366	F	rs13477379	3	126.267	1429034_at	17	24.6197	trans	Eme2	essential meiotic endonuclease 1 homolog 2 (S. pombe)
3.41784	F	rs13477379	3	126.267	1418911_s_at	X	137.565	trans	Acsl4	acyl-CoA synthetase long-chain family member 4
22.679	F	c3.loc120	3	127.516	1454751_at	3	123.36	cis	G430022H21Rik	RIKEN cDNA G430022H21 gene
3.61338	F	c3.loc122	3	129.516	1447374_at	ambig	ambig	ambig	Ube2h	Ubiquitin-conjugating enzyme E2H
36.5123	F	c3.loc122	3	129.516	1419115_at	3	121.284	cis	Alg14	asparagine-linked glycosylation 14 homolog (yeast)
3.06987	F	rs13477396	3	131.951	1435973_at	ambig	ambig	ambig	---	Transcribed locus
3.08492	F	rs13477396	3	131.951	1453869_at	ambig	ambig	ambig	LOC328277	hypothetical protein LOC328277
3.93118	F	rs13477396	3	131.951	1431169_at	1	54.4227	trans	D230012E17Rik	RIKEN cDNA D230012E17 gene
3.26807	F	rs13477396	3	131.951	1452190_at	7	92.7505	trans	Prcp	prolylcarboxypeptidase (angiotensinase C)
3.11931	F	rs13477396	3	131.951	1420882_a_at	13	55.2228	trans	Nsd1 /// Acd	nuclear receptor-binding SET-domain protein 1 /// adrenocortical dysplasia
5.76716	F	rs13477396	3	131.951	1426972_at	3	123.335	cis	Sec24d	SEC24 related gene family, member D (S. cerevisiae)
3.21833	F	rs13477397	3	132.244	1448179_at	ambig	ambig	ambig	Usmg5	upregulated during skeletal muscle growth 5
3.32686	F	rs13477397	3	132.244	1454670_at	4	149.461	trans	Rere	arginine glutamic acid dipeptide (RE) repeats
3.13961	F	rs13477397	3	132.244	1435669_at	18	65.7696	trans	Zfp532	zinc finger protein 532
3.03041	F	rs13477397	3	132.244	1452398_at	19	38.8156	trans	Plce1	phospholipase C, epsilon 1
3.29673	F	rs13477397	3	132.244	1418730_at	X	100.164	trans	Rnf12	ring finger protein 12
3.45641	F	rs13477397	3	132.244	1428512_at	X	131.236	trans	Bhlhb9	basic helix-loop-helix domain containing, class B9
4.08303	F	rs13477397	3	132.244	1430167_a_at	3	121.148	cis	Rwdd3	RWD domain containing 3
5.58115	F	rs13477397	3	132.244	1452026_a_at	3	129.873	cis	Pla2g12a	phospholipase A2, group XIIA
3.16458	F	c3.loc126	3	133.516	1455514_at	X	6.99343	trans	Kcnd1	potassium voltage-gated channel, Shal-related family, member 1
3.03132	F	c3.loc126	3	133.516	1415989_at	3	116.102	cis	Vcam1	vascular cell adhesion molecule 1
4.75779	F	rs13477411	3	135.855	1424447_at	8	75.3729	trans	1700030K09Rik	RIKEN cDNA 1700030K09 gene
3.18139	F	rs13477411	3	135.855	1418823_at	12	70.2893	trans	Arf6	ADP-ribosylation factor 6
5.54013	F	rs13477411	3	135.855	1454745_at	3	122.003	cis	Arhgap29	Rho GTPase activating protein 29
4.53513	F	rs13477411	3	135.855	1458341_x_at	3	122.851	cis	---	---
4.83621	F	rs13477411	3	135.855	1460184_at	3	131.223	cis	Hadhsc	L-3-hydroxyacyl-Coenzyme A dehydrogenase, short chain
4.10005	F	rs13477411	3	135.855	1426835_at	3	138.396	cis	Metap1	methionyl aminopeptidase 1
7.35482	F	rs13477411	3	135.855	1450909_at	3	138.464	cis	Eif4e	eukaryotic translation initiation factor 4E
3.72171	F	c3.loc130	3	137.516	1420862_at	18	60.6515	trans	Dctn4	dynactin 4
3.01391	F	c3.loc130	3	137.516	1418286_a_at	X	95.3389	trans	Efnb1	ephrin B1
3.10275	F	rs13477428	3	139.482	1418269_at	6	82.9998	trans	Loxl3	lysyl oxidase-like 3
3.69909	F	rs13477431	3	140.011	1454995_at	3	145.83	cis	Ddah1	dimethylarginine dimethylaminohydrolase 1
3.03215	F	rs3088636	3	142.703	1426133_a_at	1	37.8193	trans	Mitd1	MIT, microtubule interacting and transport, domain containing 1
4.7986	F	rs3088636	3	142.703	1448535_at	2	105.502	trans	Elp4	elongation protein 4 homolog (S. cerevisiae)
3.58782	F	rs3088636	3	142.703	1452873_at	4	46.401	trans	5830415F09Rik	RIKEN cDNA 5830415F09 gene
3.20903	F	rs3088636	3	142.703	1435010_at	7	66.5234	trans	Asb7	ankyrin repeat and SOCS box-containing protein 7
3.17608	F	rs3088636	3	142.703	1459267_at	11	59.0237	trans	2310033P09Rik	RIKEN cDNA 2310033P09 gene
3.07143	F	rs3088636	3	142.703	1435081_at	12	33.5626	trans	Sypl	synaptophysin-like protein
3.30754	F	rs3088636	3	142.703	1427003_at	12	110.754	trans	Ppp2r5c	protein phosphatase 2, regulatory subunit B (B56), gamma isoform
3.31233	F	rs13477442	3	142.883	1449250_at	3	87.9448	trans	Prcc	papillary renal cell carcinoma (translocation-associated)
3.53869	F	rs13477442	3	142.883	1455972_x_at	3	131.223	cis	Hadhsc	L-3-hydroxyacyl-Coenzyme A dehydrogenase, short chain
3.30278	F	rs13477442	3	142.883	1423112_at	3	135.377	cis	Ube2d3	ubiquitin-conjugating enzyme E2D 3 (UBC4/5 homolog, yeast)
14.725	F	rs13477442	3	142.883	1425266_a_at	3	138.863	cis	Rap1gds1	RAP1, GTP-GDP dissociation stimulator 1
4.51478	F	c3.loc138	3	145.516	1430914_at	ambig	ambig	ambig	5330426L24Rik	RIKEN cDNA 5330426L24 gene
3.1006	F	rs13477456	3	146.218	1427068_x_at	11	60.2339	trans	4933439F18Rik	RIKEN cDNA 4933439F18 gene
4.50423	F	rs13477456	3	146.218	1451135_at	3	142.703	cis	Gtf2b	general transcription factor IIB
3.3365	F	rs13477460	3	146.991	1444165_at	9	50.8203	trans	Layn	layilin
3.14717	F	c3.loc140	3	147.516	1422686_s_at	6	33.1793	trans	Exoc4	exocyst complex component 4
4.75181	F	c3.loc140	3	147.516	1452191_at	7	92.7505	trans	Prcp	prolylcarboxypeptidase (angiotensinase C)
4.90452	F	c3.loc140	3	147.516	1457262_at	7	117.924	trans	2610207I05Rik	RIKEN cDNA 2610207I05 gene
4.60764	F	rs13477466	3	148.406	1439490_at	ambig	ambig	ambig	Nr2c1	nuclear receptor subfamily 2, group C, member 1
4.76804	F	rs13477466	3	148.406	1456264_at	2	153.308	trans	Commd7 /// LOC631742 /// LOC674161	COMM domain containing 7 /// similar to COMM domain containing protein 7 /// similar to COMM domain-containing protein 7
3.23905	F	rs13477466	3	148.406	1453824_at	3	116.586	trans	A930028L21Rik	RIKEN cDNA A930028L21 gene
5.36231	F	rs13477466	3	148.406	1422659_at	3	126.589	trans	Camk2d	calcium/calmodulin-dependent protein kinase II, delta
3.12053	F	rs13477466	3	148.406	1452435_at	12	81.257	trans	Wdr22	WD repeat domain 22
3.30802	F	rs13477466	3	148.406	1438771_at	15	88.5447	trans	Brd1	bromodomain containing 1
4.39757	F	rs13477466	3	148.406	1451848_a_at	3	154.533	cis	Cryz	crystallin, zeta
5.82524	F	rs13477466	3	148.406	1438610_a_at	3	154.558	cis	Cryz	Crystallin, zeta
3.7313	F	rs13477467	3	148.569	1423205_at	2	152.894	trans	Tm9sf4	transmembrane 9 superfamily protein member 4
4.284	F	rs13477467	3	148.569	1450740_a_at	2	153.433	trans	Mapre1	microtubule-associated protein, RP/EB family, member 1
3.59065	F	rs13477467	3	148.569	1428820_at	2	153.461	trans	Mapre1	microtubule-associated protein, RP/EB family, member 1
3.14745	F	rs13477467	3	148.569	1439913_at	2	163.741	trans	1810053B01Rik	RIKEN cDNA 1810053B01 gene
3.07777	F	rs13477467	3	148.569	1434891_at	3	101.169	trans	Ptgfrn	prostaglandin F2 receptor negative regulator
3.18303	F	rs13477467	3	148.569	1418444_a_at	7	118.48	trans	Mir16	membrane interacting protein of RGS16
3.08558	F	rs13477467	3	148.569	1416045_a_at	10	75.3405	trans	Smarcb1	SWI/SNF related, matrix associated, actin dependent regulator of chromatin, subfamily b, member 1
3.08574	F	rs13477467	3	148.569	1424687_at	11	83.5699	trans	2700008B19Rik	RIKEN cDNA 2700008B19 gene
4.93101	F	rs13477467	3	148.569	1432386_a_at	14	30.0777	trans	Phf7	PHD finger protein 7
3.56316	F	rs13477467	3	148.569	1452316_at	3	133.029	cis	Ints12	integrator complex subunit 12
3.3825	F	rs13477529	3	149.999	1424055_at	2	164.692	trans	Ncoa5	nuclear receptor coactivator 5
3.46143	F	rs13477529	3	149.999	1454853_s_at	7	41.252	trans	AW146154 /// AI987944	expressed sequence AW146154 /// expressed sequence AI987944
3.52568	F	rs13477482	3	152.292	1447961_s_at	ambig	ambig	ambig	Mrpl38	mitochondrial ribosomal protein L38
6.03106	F	rs13477482	3	152.292	1426494_at	4	45.3182	trans	Rg9mtd3	RNA (guanine-9-) methyltransferase domain containing 3
3.15948	F	rs13477482	3	152.292	1451054_at	4	62.8309	trans	Orm1	orosomucoid 1
3.00549	F	rs13477482	3	152.292	1415672_at	8	24.7066	trans	Golga7	golgi autoantigen, golgin subfamily a, 7
3.03765	F	rs13477482	3	152.292	1422559_at	10	94.9447	trans	Ube2n	ubiquitin-conjugating enzyme E2N
3.37327	F	rs13477482	3	152.292	1422555_s_at	11	109.179	trans	Gna13	guanine nucleotide binding protein, alpha 13
3.02672	F	rs13477482	3	152.292	1430640_a_at	12	32.5437	trans	Prkar2b	protein kinase, cAMP dependent regulatory, type II beta
3.34962	F	rs13477482	3	152.292	1444028_s_at	14	120.677	trans	Dock9 /// LOC670309	dedicator of cytokinesis 9 /// similar to Dedicator of cytokinesis protein 9 (Cdc42 guanine nucleotide exchange factor zizimin 1)
3.71923	F	rs13477482	3	152.292	1436342_a_at	19	8.94066	trans	D19Ertd721e	DNA segment, Chr 19, ERATO Doi 721, expressed
4.67792	F	c3.loc146	3	153.516	1453467_s_at	ambig	ambig	ambig	Rps15a	ribosomal protein S15a
3.53317	F	c3.loc146	3	153.516	1422736_at	13	43.4142	trans	Ranbp9	RAN binding protein 9
3.04808	F	rs13477499	3	156.981	1447703_x_at	4	133.517	trans	Zfp593	zinc finger protein 593
3.52944	F	rs13477499	3	156.981	1429317_at	10	43.5626	trans	Qrsl1	glutaminyl-tRNA synthase (glutamine-hydrolyzing)-like 1
3.26342	F	rs13477499	3	156.981	1423912_at	11	120.489	trans	Aspscr1	alveolar soft part sarcoma chromosome region, candidate 1 (human)
3.45434	F	rs13477499	3	156.981	1430780_a_at	15	81.7828	trans	Pmm1	phosphomannomutase 1
3.72131	F	rs13477499	3	156.981	1417041_at	17	45.7075	trans	Rpo1-1	RNA polymerase 1-1
3.02928	F	rs13477499	3	156.981	1453554_a_at	18	31.9471	trans	Wdr33	WD repeat domain 33
3.22104	F	rs13477499	3	156.981	1429400_at	X	6.31077	trans	Clcn5	chloride channel 5
3.92113	F	rs13477500	3	157.193	1431744_a_at	1	23.8031	trans	Smap1	stromal membrane-associated protein 1
3.4343	F	rs13477500	3	157.193	1455010_at	2	166.754	trans	1500012F01Rik	RIKEN cDNA 1500012F01 gene
3.3877	F	rs13477500	3	157.193	1460017_at	7	42.4334	trans	LOC434179	hypothetical LOC434179
3.03568	F	rs13477500	3	157.193	1454168_a_at	7	101.537	trans	Clpb	ClpB caseinolytic peptidase B homolog (E. coli)
3.00955	F	rs13477500	3	157.193	1416669_s_at	10	127.439	trans	Naca	nascent polypeptide-associated complex alpha polypeptide
3.07233	F	rs13477500	3	157.193	1456094_at	11	118.078	trans	Usp36	ubiquitin specific peptidase 36
3.24394	F	rs13477500	3	157.193	1436928_s_at	12	4.21424	trans	Adcy3	adenylate cyclase 3
3.14896	F	rs13477500	3	157.193	1448555_at	15	97.5031	trans	D15Ertd682e	DNA segment, Chr 15, ERATO Doi 682, expressed
3.20194	F	rs13477500	3	157.193	1416415_a_at	3	137.802	cis	H2afz /// LOC666634 /// LOC669445	H2A histone family, member Z /// similar to H2A histone family, member Z /// similar to H2A histone family, member Z
5.1765	F	rs13477500	3	157.193	1415984_at	3	153.86	cis	Acadm	acyl-Coenzyme A dehydrogenase, medium chain
3.01006	F	rs13477505	3	158.59	1450513_at	ambig	ambig	ambig	Cd33	CD33 antigen
3.49254	F	rs13477505	3	158.59	1423132_a_at	ambig	ambig	ambig	5730427N09Rik /// LOC433230 /// LOC636306	RIKEN cDNA 5730427N09 gene /// similar to TGF beta-inducible nuclear protein 1 (L-name-related protein 42) (LNR42) /// similar to TGF beta-inducible nuclear protein 1 (L-name related LNR42)
4.10533	F	rs13477505	3	158.59	1417003_at	ambig	ambig	ambig	0610012G03Rik /// LOC638521	RIKEN cDNA 0610012G03 gene /// hypothetical protein LOC638521
3.1557	F	rs13477505	3	158.59	1424366_at	2	30.106	trans	Tmem15	transmembrane protein 15
3.20466	F	rs13477505	3	158.59	1450888_at	2	148.385	trans	Napb	N-ethylmaleimide sensitive fusion protein attachment protein beta
3.81656	F	rs13477505	3	158.59	1423173_at	2	148.385	trans	Napb	N-ethylmaleimide sensitive fusion protein attachment protein beta
3.13447	F	rs13477505	3	158.59	1452444_at	2	148.388	trans	Napb	N-ethylmaleimide sensitive fusion protein attachment protein beta
3.00892	F	rs13477505	3	158.59	1429106_at	3	40.891	trans	4921509J17Rik	RIKEN cDNA 4921509J17 gene
6.56337	F	rs13477505	3	158.59	1418778_at	3	129.907	trans	Ccdc109b	coiled-coil domain containing 109B
3.86126	F	rs13477505	3	158.59	1429395_at	3	132.919	trans	Gstcd	glutathione S-transferase, C-terminal domain containing
3.62006	F	rs13477505	3	158.59	1423614_at	5	105.76	trans	Lrrc8c	leucine rich repeat containing 8 family, member C
3.12222	F	rs13477505	3	158.59	1428544_at	5	130.507	trans	0610007L01Rik	RIKEN cDNA 0610007L01 gene
3.2058	F	rs13477505	3	158.59	1449519_at	6	66.9647	trans	Gadd45a	growth arrest and DNA-damage-inducible 45 alpha
3.30795	F	rs13477505	3	158.59	1435800_a_at	6	131.331	trans	Csda	cold shock domain protein A
3.52479	F	rs13477505	3	158.59	1428631_a_at	7	120.426	trans	Uqcrc2	ubiquinol cytochrome c reductase core protein 2
3.41732	F	rs13477505	3	158.59	1453589_a_at	8	20.2861	trans	2610005L07Rik	RIKEN cDNA 2610005L07 gene
3.20464	F	rs13477505	3	158.59	1429653_at	8	123.461	trans	Gse1	genetic suppressor element 1
3.38669	F	rs13477505	3	158.59	1452293_at	9	30.1783	trans	Snx19	sorting nexin 19
3.11396	F	rs13477505	3	158.59	1434951_at	9	99.3276	trans	Armc8	armadillo repeat containing 8
3.0759	F	rs13477505	3	158.59	1429370_a_at	11	80.2448	trans	Psmd11	proteasome (prosome, macropain) 26S subunit, non-ATPase, 11
3.01922	F	rs13477505	3	158.59	1428454_at	11	85.4569	trans	Bcas3	breast carcinoma amplified sequence 3
3.2589	F	rs13477505	3	158.59	1418437_a_at	11	100.903	trans	Mlx	MAX-like protein X
3.56615	F	rs13477505	3	158.59	1423137_at	13	17.6657	trans	Rala	v-ral simian leukemia viral oncogene homolog A (ras related)
3.52668	F	rs13477505	3	158.59	1415795_at	13	51.1134	trans	Spin	spindlin
3.39204	F	rs13477505	3	158.59	1460335_at	13	82.1351	trans	Lysmd3	LysM, putative peptidoglycan-binding, domain containing 3
3.49413	F	rs13477505	3	158.59	1434654_at	14	74.4366	trans	Cog3	component of oligomeric golgi complex 3
3.02164	F	rs13477505	3	158.59	1437073_x_at	14	74.4943	trans	AV025504	expressed sequence AV025504
3.41023	F	rs13477505	3	158.59	1426626_at	14	74.6311	trans	Gtf2f2	general transcription factor IIF, polypeptide 2
3.28892	F	rs13477505	3	158.59	1455129_at	15	34.0279	trans	Mtdh	Metadherin
3.90971	F	rs13477505	3	158.59	1437078_at	17	33.5721	trans	LOC631721	similar to vacuolar protein sorting 52
3.07091	F	rs13477505	3	158.59	1424070_at	18	63.1032	trans	Napg	N-ethylmaleimide sensitive fusion protein attachment protein gamma
3.15322	F	rs13477505	3	158.59	1424202_at	18	67.9003	trans	Seh1l	SEH1-like (S. cerevisiae
3.52997	F	rs13477508	3	159.7	1420664_s_at	ambig	ambig	ambig	Procr	protein C receptor, endothelial
4.5525	F	rs13477508	3	159.7	1457749_at	ambig	ambig	ambig	Cc2d1b	coiled-coil and C2 domain containing 1B
3.28188	F	rs13477508	3	159.7	1422794_at	1	80.1451	trans	Cul3	cullin 3
3.43667	F	rs13477508	3	159.7	1423581_at	2	3.20154	trans	Nmt2	N-myristoyltransferase 2
3.03177	F	rs13477508	3	159.7	1448857_a_at	2	29.9129	trans	Zdhhc12	zinc finger, DHHC domain containing 12
3.69641	F	rs13477508	3	159.7	1416130_at	2	131.604	trans	Prnp	prion protein
3.6805	F	rs13477508	3	159.7	1450739_at	3	22.34	trans	Tbl1xr1	transducin (beta)-like 1X-linked receptor 1
3.12579	F	rs13477508	3	159.7	1420413_at	3	50.4679	trans	Slc7a11	solute carrier family 7 (cationic amino acid transporter, y+ system), member 11
3.21162	F	rs13477508	3	159.7	1426831_at	3	107.791	trans	Ahcyl1	S-adenosylhomocysteine hydrolase-like 1
3.74668	F	rs13477508	3	159.7	1417179_at	3	138.68	trans	Tspan5	tetraspanin 5
4.418	F	rs13477508	3	159.7	1431530_a_at	3	138.798	trans	Tspan5	tetraspanin 5
3.01566	F	rs13477508	3	159.7	1416772_at	4	107.402	trans	Cpt2	carnitine palmitoyltransferase 2
3.06219	F	rs13477508	3	159.7	1454696_at	4	154.402	trans	Gnb1	guanine nucleotide binding protein, beta 1
3.19993	F	rs13477508	3	159.7	1418514_at	5	108.306	trans	Mtf2	metal response element binding transcription factor 2
3.0631	F	rs13477508	3	159.7	1451073_at	5	115.272	trans	Sppl3	signal peptide peptidase 3
3.09205	F	rs13477508	3	159.7	1433556_at	5	139.526	trans	Centa1	centaurin, alpha 1
3.68092	F	rs13477508	3	159.7	1454978_at	5	140.873	trans	Ttyh3	tweety homolog 3 (Drosophila)
3.27891	F	rs13477508	3	159.7	1431644_a_at	6	8.68044	trans	Ica1	islet cell autoantigen 1
3.50763	F	rs13477508	3	159.7	1429566_a_at	6	38.7477	trans	Hipk2	homeodomain interacting protein kinase 2
3.30237	F	rs13477508	3	159.7	1454955_at	7	109.832	trans	Ipo7	importin 7
3.85391	F	rs13477508	3	159.7	1427189_at	9	59.19	trans	Arih1	ariadne ubiquitin-conjugating enzyme E2 binding protein homolog 1 (Drosophila)
3.24235	F	rs13477508	3	159.7	1424377_at	9	72.9106	trans	LOC670726	similar to ribosomal protein L24-like
3.2461	F	rs13477508	3	159.7	1455959_s_at	9	77.5795	trans	---	---
3.29184	F	rs13477508	3	159.7	1436510_a_at	9	111.067	trans	Lrrfip2	leucine rich repeat (in FLII) interacting protein 2
3.07996	F	rs13477508	3	159.7	1448245_at	9	119.976	trans	Rpsa	ribosomal protein SA
3.52537	F	rs13477508	3	159.7	1426793_a_at	9	120.421	trans	Rpl14	ribosomal protein L14
3.02949	F	rs13477508	3	159.7	1417566_at	9	122.2	trans	Abhd5	abhydrolase domain containing 5
3.03379	F	rs13477508	3	159.7	1426955_at	10	76.4959	trans	Col18a1	procollagen, type XVIII, alpha 1
3.55211	F	rs13477508	3	159.7	1416261_at	10	114.745	trans	Tmem19	transmembrane protein 19
3.80566	F	rs13477508	3	159.7	1449209_a_at	12	80.093	trans	Rdh11	retinol dehydrogenase 11
4.02322	F	rs13477508	3	159.7	1428742_at	16	32.1499	trans	Fbxo45	F-box protein 45
3.19974	F	rs13477508	3	159.7	1427206_at	18	67.5301	trans	Afg3l2	AFG3(ATPase family gene 3)-like 2 (yeast)
3.26699	F	rs13477508	3	159.7	1425364_a_at	19	8.77462	trans	Slc3a2	solute carrier family 3 (activators of dibasic and neutral amino acid transport), member 2
3.1229	F	rs13477508	3	159.7	1426271_at	19	23.2735	trans	Smc5	structural maintenance of chromosomes 5
3.47937	F	rs13477508	3	159.7	1436499_at	19	32.1887	trans	Tmem23	transmembrane protein 23
3.23546	F	rs13477508	3	159.7	1419631_at	X	7.23857	trans	Was	Wiskott-Aldrich syndrome homolog (human)
3.18735	F	rs13477532	4	3.6308	1451668_at	1	158.515	trans	C530043G21Rik	RIKEN cDNA C530043G21 gene
3.62444	F	rs13477532	4	3.6308	1423777_at	2	30.833	trans	Usp20	ubiquitin specific peptidase 20
3.45174	F	rs13477532	4	3.6308	1451189_at	2	164.514	trans	Zswim1	zinc finger, SWIM domain containing 1
3.12274	F	rs13477532	4	3.6308	1450889_at	3	20.25	trans	Smarca3	SWI/SNF related, matrix associated, actin dependent regulator of chromatin, subfamily a, member 3
3.16003	F	rs13477532	4	3.6308	1451356_at	3	96.0147	trans	Anp32e	acidic (leucine-rich) nuclear phosphoprotein 32 family, member E
3.36781	F	rs13477532	4	3.6308	1422155_at	3	96.3235	trans	Hist2h3c2	histone 2, H3c2
5.77543	F	rs13477532	4	3.6308	1415766_at	3	98.0078	trans	Sec22b	SEC22 vesicle trafficking protein homolog B (S. cerevisiae)
3.02017	F	rs13477532	4	3.6308	1417814_at	4	138.071	trans	Pla2g5	phospholipase A2, group V
3.01228	F	rs13477532	4	3.6308	1451522_s_at	5	137.859	trans	Lrch4	leucine-rich repeats and calponin homology (CH) domain containing 4
3.44033	F	rs13477532	4	3.6308	1453124_at	6	29.4908	trans	Tnpo3	transportin 3
4.35699	F	rs13477532	4	3.6308	1455676_x_at	7	128.233	trans	Tial1	Tial1 cytotoxic granule-associated RNA binding protein-like 1
3.07678	F	rs13477532	4	3.6308	1415910_s_at	8	97.7112	trans	Ciapin1	cytokine induced apoptosis inhibitor 1
3.02062	F	rs13477532	4	3.6308	1448422_at	11	6.16983	trans	Tmed4	transmembrane emp24 protein transport domain containing 4
3.15074	F	rs13477532	4	3.6308	1433639_at	11	95.1916	trans	5730593F17Rik	RIKEN cDNA 5730593F17 gene
3.2105	F	rs13477532	4	3.6308	1449626_s_at	11	102.928	trans	Acbd4	acyl-Coenzyme A binding domain containing 4
3.21567	F	rs13477532	4	3.6308	1456473_x_at	11	103.789	trans	Arf2	ADP-ribosylation factor 2
3.20435	F	rs13477532	4	3.6308	1451044_at	12	59.9314	trans	Sip1	survivor of motor neuron protein interacting protein 1
3.09414	F	rs13477532	4	3.6308	1453987_at	12	65.8749	trans	Btbd5	BTB (POZ) domain containing 5
5.00818	F	rs13477532	4	3.6308	1450399_at	12	84.5783	trans	Psen1	presenilin 1
3.4277	F	rs13477532	4	3.6308	1447517_at	13	113.994	trans	Skiv2l2	superkiller viralicidic activity 2-like 2 (S. cerevisiae)
3.30495	F	rs13477532	4	3.6308	1426903_at	14	71.273	trans	Fndc3a	fibronectin type III domain containing 3a
3.15236	F	rs13477532	4	3.6308	1460447_at	15	94.3508	trans	Pus7l	pseudouridylate synthase 7 homolog (S. cerevisiae)-like
3.37867	F	rs13477532	4	3.6308	1436860_at	16	56.1094	trans	Senp7	SUMO1/sentrin specific peptidase 7
3.01382	F	rs13477532	4	3.6308	1450705_at	17	34.4585	trans	Rdbp	RD RNA-binding protein
3.06033	F	rs13477532	4	3.6308	1453180_at	19	33.2037	trans	6530404N21Rik	RIKEN cDNA 6530404N21 gene
7.64033	F	rs13477532	4	3.6308	1423649_at	4	3.47619	cis	Tmem68	transmembrane protein 68
4.38977	F	rs13477532	4	3.6308	1430000_at	4	3.48232	cis	B230117O15Rik	RIKEN cDNA B230117O15 gene
10.1458	F	rs13477532	4	3.6308	1444318_at	4	3.86789	cis	Chchd7	Coiled-coil-helix-coiled-coil-helix domain containing 7
3.15014	F	rs13477532	4	3.6308	1434228_at	4	11.8869	cis	Ppm2c	protein phosphatase 2C, magnesium dependent, catalytic subunit
5.54463	F	rs13477532	4	3.6308	1433735_a_at	4	15.1933	cis	Tmem64	transmembrane protein 64
4.08996	F	rs13477540	4	5.9223	1434307_at	4	15.2123	cis	Tmem64	transmembrane protein 64
3.13648	F	rs13477543	4	6.8003	1438902_a_at	ambig	ambig	ambig	Hsp90aa1	heat shock protein 90kDa alpha (cytosolic), class A member 1
3.40599	F	rs13477543	4	6.8003	1428380_at	5	31.3252	trans	0610007C21Rik	RIKEN cDNA 0610007C21 gene
3.05911	F	rs13477543	4	6.8003	1429339_a_at	5	121.882	trans	Acad10	acyl-Coenzyme A dehydrogenase family, member 10
3.06735	F	rs13477543	4	6.8003	1424094_at	12	86.1885	trans	Nek9	NIMA (never in mitosis gene a)-related expressed kinase 9
4.95534	F	rs13477543	4	6.8003	1450417_a_at	4	3.75873	cis	Rps20 /// LOC245676 /// LOC623568	ribosomal protein S20 /// similar to 40S ribosomal protein S20 /// similar to 40S ribosomal protein S20
9.1216	F	rs13477543	4	6.8003	1454709_at	4	15.1933	cis	Tmem64	transmembrane protein 64
3.36829	F	c4.loc4	4	7.6308	1418781_at	11	114.999	trans	Nat9	NAT9
5.51707	F	rs13477555	4	10.1419	1417723_at	4	33.3601	trans	Ube2j1	ubiquitin-conjugating enzyme E2, J1
4.56516	F	c4.loc8	4	11.6308	1456080_a_at	2	163.328	trans	Serinc3	serine incorporator 3
7.86384	F	c4.loc8	4	11.6308	1419367_at	4	15.8443	cis	Decr1	2,4-dienoyl CoA reductase 1, mitochondrial
3.5645	F	rs13477565	4	12.4096	1422489_at	6	83.0812	trans	Gcs1	glucosidase 1
3.15384	F	c4.loc10	4	13.6308	1456015_x_at	19	4.0075	trans	Ndufv1	NADH dehydrogenase (ubiquinone) flavoprotein 1
5.02821	F	c4.loc10	4	13.6308	1421935_at	4	3.75873	cis	Rps20 /// LOC245676 /// LOC623568	ribosomal protein S20 /// similar to 40S ribosomal protein S20 /// similar to 40S ribosomal protein S20
3.07196	F	rs13477569	4	13.9068	1428298_at	4	125.653	trans	1700029G01Rik	RIKEN cDNA 1700029G01 gene
3.02202	F	rs13477585	4	17.5906	1449791_x_at	ambig	ambig	ambig	9130023D20Rik	RIKEN cDNA 9130023D20 gene
3.51809	F	rs13477585	4	17.5906	1450458_at	1	13.1274	trans	Ncoa2	nuclear receptor coactivator 2
3.0141	F	rs6163246	4	20.7848	1434981_at	8	108.593	trans	E130303B06Rik	RIKEN cDNA E130303B06 gene
3.66277	F	rs6163246	4	20.7848	1448447_at	15	76.4493	trans	Vps28	vacuolar protein sorting 28 (yeast)
3.57758	F	rs6163246	4	20.7848	1416057_at	X	19.7723	trans	Ndufb11	NADH dehydrogenase (ubiquinone) 1 beta subcomplex, 11
3.92665	F	rs13477611	4	24.5771	1422623_x_at	ambig	ambig	ambig	Rpl41	Ribosomal protein L41
3.26672	F	rs13477611	4	24.5771	1417287_at	2	152.361	trans	H13	histocompatibility 13
3.41562	F	rs13477611	4	24.5771	1451671_at	9	119.774	trans	Gorasp1	golgi reassembly stacking protein 1
3.29491	F	rs13477611	4	24.5771	1451315_at	11	101.969	trans	Tmem101	transmembrane protein 101
3.85268	F	rs4224426	4	25.2373	1432270_a_at	4	41.1476	cis	Chmp5	chromatin modifying protein 5
3.87579	F	rs13477616	4	26.7777	1415968_a_at	6	133.816	trans	Kap	kidney androgen regulated protein
3.02048	F	rs13477616	4	26.7777	1419327_at	16	13.7492	trans	2210010A19Rik	RIKEN cDNA 2210010A19 gene
5.02417	F	rs13477619	4	27.6199	1436067_at	3	9.26132	trans	Zbtb10 /// LOC669642	zinc finger and BTB domain containing 10 /// similar to zinc finger and BTB domain containing 10
3.56091	F	rs13477619	4	27.6199	1428365_a_at	17	56.2994	trans	Prss15	protease, serine, 15
3.21646	F	rs13477625	4	30.0736	1431075_a_at	11	3.12988	trans	Eif4enif1	eukaryotic translation initiation factor 4E nuclear import factor 1
4.72356	F	rs13477635	4	33.4008	1416806_at	11	115.084	trans	Fdxr	ferredoxin reductase
3.7624	F	c4.loc34	4	37.6308	1459104_at	7	131.361	trans	Bub3	budding uninhibited by benzimidazoles 3 homolog (S. cerevisiae)
3.17686	F	c4.loc34	4	37.6308	1429980_x_at	11	119.935	trans	1810073N04Rik	RIKEN cDNA 1810073N04 gene
3.4111	F	rs13477659	4	39.2597	1438201_at	4	11.8853	trans	Ppm2c	protein phosphatase 2C, magnesium dependent, catalytic subunit
5.12017	F	rs13477659	4	39.2597	1417082_at	4	46.4719	cis	Anp32b	acidic nuclear phosphoprotein 32 family, member B
3.22839	F	rs13477660	4	39.4985	1418367_x_at	3	96.3248	trans	Hist2h3c1 /// Hist2h2aa1 /// Hist1h2ad /// Hist1h2an /// Hist2h2ab /// Hist2h2ac /// Hist2h2aa2	histone 2, H3c1 /// histone 2, H2aa1 /// histone 1, H2ad /// histone 1, H2an /// histone 2, H2ab /// histone 2, H2ac /// histone 2, H2aa2
3.01901	F	rs13477660	4	39.4985	1421904_at	4	3.50202	trans	Ncoa6ip	nuclear receptor coactivator 6 interacting protein
3.10831	F	rs13477660	4	39.4985	1452873_at	4	46.401	cis	5830415F09Rik	RIKEN cDNA 5830415F09 gene
3.08658	F	rs13477662	4	39.8385	1427006_at	2	29.5604	trans	Rapgef1	Rap guanine nucleotide exchange factor (GEF) 1
3.56887	F	rs13477662	4	39.8385	1450835_a_at	2	130.731	trans	Gfra4	glial cell line derived neurotrophic factor family receptor alpha 4
5.65645	F	rs13477662	4	39.8385	1418366_at	3	96.3248	trans	Hist2h3c1 /// Hist2h2aa1 /// Hist1h2ad /// Hist1h2an /// Hist2h2ab /// Hist2h2ac /// Hist2h2aa2	histone 2, H3c1 /// histone 2, H2aa1 /// histone 1, H2ad /// histone 1, H2an /// histone 2, H2ab /// histone 2, H2ac /// histone 2, H2aa2
3.55465	F	rs13477662	4	39.8385	1417515_at	4	125.599	trans	Lsm10	U7 snRNP-specific Sm-like protein LSM10
3.1623	F	rs13477662	4	39.8385	1448490_at	7	26.9418	trans	Adck4	aarF domain containing kinase 4
3.26554	F	rs13477662	4	39.8385	1416735_at	8	42.8395	trans	Asah1	N-acylsphingosine amidohydrolase 1
3.95684	F	rs13477662	4	39.8385	1416101_a_at	13	23.7463	trans	Hist1h1c	histone 1, H1c
3.17393	F	rs13477662	4	39.8385	1424231_s_at	19	37.6155	trans	Exoc6	exocyst complex component 6
3.28286	F	rs13477664	4	40.0727	1450756_s_at	1	80.1451	trans	Cul3	cullin 3
3.34374	F	rs13477664	4	40.0727	1421892_at	8	113.844	trans	---	---
3.729	F	rs13477664	4	40.0727	1416501_at	17	23.8061	trans	Pdpk1	3-phosphoinositide dependent protein kinase-1
3.03551	F	rs4224449	4	41.5282	1438767_at	ambig	ambig	ambig	Osm	oncostatin M
3.38551	F	rs4224449	4	41.5282	1442252_at	ambig	ambig	ambig	Kif13a	kinesin family member 13A
4.01151	F	rs4224449	4	41.5282	1418345_at	ambig	ambig	ambig	Tnfsf13 /// Tnfsf12-tnfsf13	tumor necrosis factor (ligand) superfamily, member 13 /// tumor necrosis factor (ligand) superfamily, member 12-member 13
3.48653	F	rs4224449	4	41.5282	1455285_at	4	61.8471	trans	Slc31a1	solute carrier family 31, member 1
3.85063	F	rs4224449	4	41.5282	1436716_at	5	9.26668	trans	Ppp1r14b	protein phosphatase 1, regulatory (inhibitor) subunit 14B
3.63736	F	rs4224449	4	41.5282	1423597_at	5	67.8995	trans	Atp8a1	ATPase, aminophospholipid transporter (APLT), class I, type 8A, member 1
3.16042	F	rs4224449	4	41.5282	1452134_at	5	108.87	trans	3010001K23Rik	RIKEN cDNA 3010001K23 gene
3.19136	F	rs4224449	4	41.5282	1448418_s_at	14	54.5151	trans	Wdr23	WD repeat domain 23
6.42862	F	rs4224449	4	41.5282	1416247_at	4	41.9035	cis	Dctn3	dynactin 3
20.0461	F	rs4224449	4	41.5282	1438155_x_at	4	43.0387	cis	Pigo	phosphatidylinositol glycan anchor biosynthesis, class O
4.87683	F	c4.loc38	4	41.6308	1433663_s_at	4	46.1741	cis	AU014645	expressed sequence AU014645
9.79248	F	rs6321462	4	42.9407	1434962_x_at	ambig	ambig	ambig	Ccl27	chemokine (C-C motif) ligand 27
17.0523	F	rs6321462	4	42.9407	1457588_at	ambig	ambig	ambig	C76213	expressed sequence C76213
33.1862	F	rs6321462	4	42.9407	1437142_a_at	ambig	ambig	ambig	Pigo	phosphatidylinositol glycan anchor biosynthesis, class O
4.57436	F	rs6321462	4	42.9407	1417721_s_at	4	130.185	trans	Laptm5 /// LOC669058	lysosomal-associated protein transmembrane 5 /// similar to Lysosomal-associated multitransmembrane protein (Retinoic acid-inducible E3 protein)
3.00396	F	rs6321462	4	42.9407	1416550_at	6	34.0858	trans	Slc35b4	solute carrier family 35, member B4
3.98564	F	rs6321462	4	42.9407	1457097_at	6	51.7879	trans	Scap2	src family associated phosphoprotein 2
3.46724	F	rs6321462	4	42.9407	1433662_s_at	11	118.117	trans	Timp2	tissue inhibitor of metalloproteinase 2
3.43651	F	rs6321462	4	42.9407	1420924_at	11	118.118	trans	Timp2	tissue inhibitor of metalloproteinase 2
3.08942	F	rs6321462	4	42.9407	1422948_s_at	13	23.7682	trans	Hist1h4h /// Hist2h4 /// Hist1h4c /// Hist1h4i /// Hist1h4j /// Hist1h4k /// Hist1h4m /// Hist1h4a /// Hist1h4b	histone 1, H4h /// histone 2, H4 /// histone 1, H4c /// histone 1, H4i /// histone 1, H4j /// histone 1, H4k /// histone 1, H4m /// histone 1, H4a /// histone 1, H4b
3.48638	F	rs6321462	4	42.9407	1416597_at	17	55.6729	trans	Hdgfrp2	hepatoma-derived growth factor, related protein 2
13.2277	F	rs6321462	4	42.9407	1419188_s_at	4	41.958	cis	Ccl27	chemokine (C-C motif) ligand 27
14.3456	F	rs6321462	4	42.9407	1450662_at	4	43.463	cis	Tesk1	testis specific protein kinase 1
7.70925	F	rs6321462	4	42.9407	1434338_at	4	43.6068	cis	1110029E03Rik	RIKEN cDNA 1110029E03 gene
11.6334	F	rs6321462	4	42.9407	1425196_a_at	4	43.6753	cis	Hint2	histidine triad nucleotide binding protein 2
3.3581	F	rs3089096	4	43.6687	1429879_at	4	107.388	trans	0610037L13Rik	RIKEN cDNA 0610037L13 gene
4.12425	F	rs3089096	4	43.6687	1452540_a_at	13	21.795	trans	Hist1h2bc /// Hist1h2be /// Hist1h2bl /// Hist1h2bm /// Hist1h2bp /// LOC665596 /// LOC665622 /// LOC671645	histone 1, H2bc /// histone 1, H2be /// histone 1, H2bl /// histone 1, H2bm /// histone 1, H2bp /// similar to Histone H2B F (H2B 291A) /// similar to Histone H2B F (H2B 291A) /// similar to Histone H2B F (H2B 291A)
3.5506	F	rs3089096	4	43.6687	1419979_s_at	4	43.5876	cis	Creb3	cAMP responsive element binding protein 3
3.50411	F	rs13477678	4	44.7793	1423601_s_at	18	60.9399	trans	Tcof1	Treacher Collins Franceschetti syndrome 1, homolog
13.0954	F	rs13477679	4	44.9268	1437026_at	ambig	ambig	ambig	BC057893	cDNA sequence BC057893
4.83373	F	rs13477679	4	44.9268	1426523_a_at	5	69.8541	trans	Gnpda2	glucosamine-6-phosphate deaminase 2
3.27349	F	rs13477679	4	44.9268	1417446_at	8	108.833	trans	Slc12a4	solute carrier family 12, member 4
3.061	F	rs13477679	4	44.9268	1454811_a_at	10	57.2042	trans	Serinc1	serine incorporator 1
4.02606	F	rs13477679	4	44.9268	1419628_at	12	85.4596	trans	Chx10	C. elegans ceh-10 homeo domain containing homolog
3.35218	F	rs13477679	4	44.9268	1428014_at	13	23.5385	trans	Hist1h4h	histone 1, H4h
3.23679	F	rs13477679	4	44.9268	1417691_at	14	68.8352	trans	Bin3	bridging integrator 3
3.29375	F	rs13477679	4	44.9268	1427557_at	15	88.6335	trans	Alg12	asparagine-linked glycosylation 12 homolog (yeast, alpha-1,6-mannosyltransferase)
3.40377	F	rs13477679	4	44.9268	1416960_at	19	8.98744	trans	B3gat3	beta-1,3-glucuronyltransferase 3 (glucuronosyltransferase I)
6.78387	F	rs13477679	4	44.9268	1450187_a_at	4	41.944	cis	Galt	galactose-1-phosphate uridyl transferase
6.27837	F	rs13477681	4	45.465	1417505_s_at	4	41.9487	cis	Il11ra1 /// Il11ra2 /// LOC621887	interleukin 11 receptor, alpha chain 1 /// interleukin 11 receptor, alpha chain 2 /// similar to interleukin 11 receptor, alpha chain 2
3.09889	F	c4.loc44	4	47.6308	1423456_at	12	36.6021	trans	Bzw2	basic leucine zipper and W2 domains 2
18.4346	F	c4.loc44	4	47.6308	1417083_at	4	47.4958	cis	Sec61b	Sec61 beta subunit
3.20931	F	rs13477695	4	49.4509	1458180_at	ambig	ambig	ambig	---	---
3.37468	F	rs13477695	4	49.4509	1445785_at	ambig	ambig	ambig	---	---
4.75279	F	rs13477695	4	49.4509	1427862_at	ambig	ambig	ambig	Arl6ip3	ADP-ribosylation factor-like 6 interacting protein 3
3.6821	F	rs13477695	4	49.4509	1417043_at	8	108.829	trans	Lcat	lecithin cholesterol acyltransferase
4.56947	F	rs13477695	4	49.4509	1417132_at	9	109.733	trans	Cdc25a	cell division cycle 25 homolog A (S. cerevisiae)
3.61637	F	rs13477695	4	49.4509	1416027_at	13	74.7691	trans	Pdcd6	programmed cell death 6
3.1614	F	rs13477695	4	49.4509	1428537_at	18	61.7139	trans	Csnk1a1	casein kinase 1, alpha 1
13.7839	F	rs13477695	4	49.4509	1449664_s_at	4	49.6773	cis	Rnf20	ring finger protein 20
3.15517	F	rs13477704	4	52.0764	1454644_at	3	107.741	trans	6330569M22Rik	RIKEN cDNA 6330569M22 gene
4.49394	F	rs13477704	4	52.0764	1419916_at	4	49.6773	cis	Rnf20	Ring finger protein 20
3.43638	F	c4.loc50	4	53.6308	1451048_at	10	93.2904	trans	Metap2	methionine aminopeptidase 2
3.08829	F	c4.loc50	4	53.6308	1427870_x_at	12	113.777	trans	Igh-4	immunoglobulin heavy chain 4 (serum IgG1)
4.27483	F	c4.loc52	4	55.6308	1460314_s_at	3	96.3541	trans	Hist2h3c1 /// Hist2h3c2 /// Hist1h3g /// Hist1h3f /// Hist1h3c /// Hist1h3d /// Hist1h3b /// Hist1h3e /// Hist1h3h /// Hist1h3i /// Hist2h3b /// Hist1h3a	histone 2, H3c1 /// histone 2, H3c2 /// histone 1, H3g /// histone 1, H3f /// histone1, H3c /// histone1, H3d /// histone 1, H3b /// histone 1, H3e /// histone 1, H3h /// histone 1, H3i /// histone 2, H3b /// histone 1, H3a
3.54698	F	c4.loc52	4	55.6308	1429320_at	8	49.209	trans	4921511I16Rik	RIKEN cDNA 4921511I16 gene
3.04172	F	c4.loc54	4	57.6308	1447449_at	5	43.5213	trans	---	---
3.65093	F	c4.loc54	4	57.6308	1416226_at	5	145.368	trans	Arpc1b	actin related protein 2/3 complex, subunit 1B
4.34352	F	c4.loc54	4	57.6308	1424741_s_at	4	43.5835	cis	Creb3	cAMP responsive element binding protein 3
4.63028	F	rs13477739	4	61.7992	1423263_at	1	182.639	trans	H3f3a	H3 histone, family 3A
4.0282	F	rs13477739	4	61.7992	1437389_x_at	4	129.217	trans	---	---
3.0212	F	rs13477739	4	61.7992	1448951_at	4	144.48	trans	Tnfrsf1b	tumor necrosis factor receptor superfamily, member 1b
3.72931	F	rs13477739	4	61.7992	1417104_at	7	45.7861	trans	Emp3	epithelial membrane protein 3
3.75437	F	rs13477739	4	61.7992	1424163_at	11	51.4671	trans	Rmnd5b	required for meiotic nuclear division 5 homolog B (S. cerevisiae)
4.80915	F	rs13477739	4	61.7992	1453171_s_at	12	73.7032	trans	Ppm1a	protein phosphatase 1A, magnesium dependent, alpha isoform
4.24899	F	rs13477739	4	61.7992	1416479_a_at	13	41.0272	trans	Tmem14c	transmembrane protein 14C
3.16494	F	rs13477739	4	61.7992	1425714_a_at	15	82.8272	trans	Nfam1	Nfat activating molecule with ITAM motif 1
3.66892	F	rs13477739	4	61.7992	1427325_s_at	4	62.8535	cis	AI597013	expressed sequence AI597013
4.42944	F	rs13477740	4	62.6546	1441580_at	ambig	ambig	ambig	Sgpp2	Sphingosine-1-phosphate phosphotase 2
3.35862	F	rs13477740	4	62.6546	1434846_at	4	86.32	trans	1700065A05Rik	RIKEN cDNA 1700065A05 gene
3.77282	F	rs13477740	4	62.6546	1454614_at	5	53.5555	trans	1810013D10Rik	RIKEN cDNA 1810013D10 gene
4.57987	F	rs13477740	4	62.6546	1435604_at	11	87.0359	trans	Trim37	tripartite motif protein 37
3.32505	F	c4.loc60	4	63.6308	1418033_s_at	11	65.6234	trans	Zfp535	zinc finger protein 535
3.07762	F	c4.loc62	4	65.6308	1447205_x_at	ambig	ambig	ambig	Rps12 /// LOC432865 /// LOC434843 /// LOC546371 /// LOC626048 /// LOC627835 /// LOC665463 /// LOC665501 /// LOC665522 /// LOC665555 /// LOC665579 /// LOC665611 /// LOC668354 /// LOC670751 /// LOC670832 /// LOC671641 /// LOC672008 /// LOC672415 /// LOC673522 /// LOC676277	ribosomal protein S12 /// similar to ribosomal protein S12 /// similar to ribosomal protein S12 /// similar to ribosomal protein S12 /// similar to ribosomal protein S12 /// similar to ribosomal protein S12 /// similar to ribosomal protein S12 /// similar to ribosomal protein S12 /// similar to ribosomal protein S12 /// similar to ribosomal protein S12 /// similar to ribosomal protein S12 /// sim…
3.04963	F	c4.loc62	4	65.6308	1436426_at	5	44.0181	trans	5730509K17Rik	RIKEN cDNA 5730509K17 gene
3.73332	F	c4.loc62	4	65.6308	1424475_at	5	122.993	trans	Camkk2	calcium/calmodulin-dependent protein kinase kinase 2, beta
3.19324	F	c4.loc62	4	65.6308	1418694_at	6	72.7706	trans	Kcmf1	potassium channel modulatory factor 1
3.51736	F	c4.loc62	4	65.6308	1435182_at	7	18.0494	trans	C530028I08Rik	RIKEN cDNA C530028I08 gene
3.31769	F	c4.loc62	4	65.6308	1433582_at	9	94.3272	trans	1190002N15Rik	RIKEN cDNA 1190002N15 gene
3.23093	F	c4.loc62	4	65.6308	1429726_at	10	69.6405	trans	Slc16a9	solute carrier family 16 (monocarboxylic acid transporters), member 9
3.36587	F	c4.loc62	4	65.6308	1450906_at	10	94.2207	trans	Plxnc1	plexin C1
5.89992	F	c4.loc62	4	65.6308	1452008_at	4	82.6915	cis	9130422G05Rik	RIKEN cDNA 9130422G05 gene
3.29373	F	c4.loc64	4	67.6308	1453556_x_at	ambig	ambig	ambig	Cd99	CD99 antigen
3.50296	F	c4.loc64	4	67.6308	1455043_at	13	99.9418	trans	Tnpo1	transportin 1
3.22477	F	rs3023981	4	68.6059	1434116_at	11	118.846	trans	Cbx2	chromobox homolog 2 (Drosophila Pc class)
5.53086	F	rs13477764	4	69.5851	1424458_at	4	73.7231	cis	Jmjd2c	jumonji domain containing 2C
6.36594	F	c4.loc66	4	69.6308	1440192_at	4	82.6976	cis	1810054D07Rik	RIKEN cDNA 1810054D07 gene
3.11429	F	rs13477769	4	71.0424	1426647_at	8	75.4942	trans	9130011J15Rik	RIKEN cDNA 9130011J15 gene
3.00449	F	rs6292114	4	73.4356	1418099_at	4	144.48	trans	Tnfrsf1b	tumor necrosis factor receptor superfamily, member 1b
5.50408	F	rs6292114	4	73.4356	1419076_a_at	5	150.791	trans	Brca2	breast cancer 2
3.1081	F	rs6292114	4	73.4356	1448968_at	7	121.858	trans	D7Wsu128e	DNA segment, Chr 7, Wayne State University 128, expressed
3.10036	F	rs6292114	4	73.4356	1427111_s_at	9	20.8246	trans	Raver1	ribonucleoprotein, PTB-binding 1
3.10049	F	rs6292114	4	73.4356	1438955_x_at	14	24.5334	trans	Ppif	peptidylprolyl isomerase F (cyclophilin F)
4.65233	F	rs6292114	4	73.4356	1451495_at	18	7.86919	trans	Wac	WW domain containing adaptor with coiled-coil
8.09121	F	rs6292114	4	73.4356	1442044_at	4	86.3239	cis	---	Transcribed locus
5.74318	F	rs13477781	4	73.6874	1437202_at	4	94.4341	trans	Mysm1	myb-like, SWIRM and MPN domains 1
3.78497	F	rs13477781	4	73.6874	1435908_at	19	6.53016	trans	Nrxn2	neurexin II
3.07322	F	rs13477797	4	77.6891	1436208_at	1	93.3884	trans	Asb1	ankyrin repeat and SOCS box-containing protein 1
3.34511	F	rs13477797	4	77.6891	1417406_at	7	27.1957	trans	Sertad1	SERTA domain containing 1
3.1583	F	rs13477804	4	80.4164	1428850_x_at	ambig	ambig	ambig	Cd99	CD99 antigen
3.01428	F	rs13477804	4	80.4164	1436585_at	2	51.9482	trans	BB182297	expressed sequence BB182297
4.16064	F	rs13477804	4	80.4164	1437149_at	6	91.7213	trans	Slc6a6	solute carrier family 6 (neurotransmitter transporter, taurine), member 6
3.29498	F	rs13477804	4	80.4164	1433818_at	10	77.6729	trans	Agpat3	1-acylglycerol-3-phosphate O-acyltransferase 3
3.2753	F	rs13477804	4	80.4164	1450504_a_at	10	77.6767	trans	Agpat3	1-acylglycerol-3-phosphate O-acyltransferase 3
3.47385	F	rs13477804	4	80.4164	1425161_a_at	15	88.9039	trans	Trabd	TraB domain containing
3.63265	F	rs13477805	4	80.8954	1423192_at	14	55.6761	trans	Pspc1	paraspeckle protein 1
3.22143	F	rs13477809	4	81.9572	1439541_at	6	72.3695	trans	4930414L22Rik	RIKEN cDNA 4930414L22 gene
12.513	F	rs13477809	4	81.9572	1428760_at	4	82.889	cis	Snapc3	small nuclear RNA activating complex, polypeptide 3
5.47225	F	rs13477809	4	81.9572	1442148_at	4	82.9257	cis	Psip1	PC4 and SFRS1 interacting protein 1
13.9695	F	rs13477809	4	81.9572	1417166_at	4	82.9269	cis	Psip1	PC4 and SFRS1 interacting protein 1
7.23169	F	rs13477809	4	81.9572	1460403_at	4	82.9331	cis	Psip1	PC4 and SFRS1 interacting protein 1
4.87571	F	rs13477811	4	82.7797	1453077_a_at	4	82.889	cis	Snapc3	small nuclear RNA activating complex, polypeptide 3
3.43876	F	rs13477811	4	82.7797	1429665_at	4	86.0501	cis	6230416J20Rik	RIKEN cDNA 6230416J20 gene
22.29	F	c4.loc80	4	83.6308	1416142_at	4	86.3253	cis	Rps6 /// LOC214738 /// LOC384383 /// LOC545640 /// LOC626259 /// LOC629575 /// LOC638497 /// LOC639593 /// LOC639750 /// LOC666577 /// LOC667739 /// LOC667922 /// LOC671306 /// LOC671432 /// LOC672620 /// LOC675985	ribosomal protein S6 /// similar to 40S ribosomal protein S6 /// similar to 40S ribosomal protein S6 /// similar to 40S ribosomal protein S6 /// similar to 40S ribosomal protein S6 /// similar to 40S ribosomal protein S6 /// similar to 40S ribosomal protein S6 /// similar to 40S ribosomal protein S6 /// similar to 40S ribosomal protein S6 /// similar to 40S ribosomal protein S6 /// similar to 40S…
3.07038	F	rs13477825	4	86.1866	1452067_at	ambig	ambig	ambig	Asahl	N-acylsphingosine amidohydrolase (acid ceramidase)-like
3.08992	F	rs13477825	4	86.1866	1424542_at	3	90.6878	trans	S100a4	S100 calcium binding protein A4
3.32431	F	rs13477825	4	86.1866	1452016_at	5	149.575	trans	Alox5ap	arachidonate 5-lipoxygenase activating protein
3.07485	F	rs13477825	4	86.1866	1435323_a_at	13	30.2528	trans	Mboat1	membrane bound O-acyltransferase domain containing 1
3.23147	F	rs13477825	4	86.1866	1451469_at	4	84.5693	cis	D530005L17Rik	RIKEN cDNA D530005L17 gene
4.07897	F	rs13477825	4	86.1866	1446407_at	4	94.4461	cis	Mysm1	Myb-like, SWIRM and MPN domains 1
4.27518	F	rs13477825	4	86.1866	1448694_at	4	94.5411	cis	Jun	Jun oncogene
6.53028	F	c4.loc84	4	87.6308	1452009_at	4	82.6915	cis	9130422G05Rik	RIKEN cDNA 9130422G05 gene
3.4917	F	rs13477836	4	89.0531	1448848_at	2	30.775	trans	Tor1b	torsin family 1, member B
3.50251	F	rs13477836	4	89.0531	1423686_a_at	15	102.287	trans	Prr13	proline rich 13
3.67747	F	c4.loc86	4	89.6308	1423679_at	4	49.6065	trans	2810432L12Rik	RIKEN cDNA 2810432L12 gene
4.22658	F	c4.loc86	4	89.6308	1436138_at	11	62.132	trans	---	---
5.83586	F	c4.loc86	4	89.6308	1435209_at	4	87.8266	cis	BC057079	cDNA sequence BC057079
3.03964	F	c4.loc90	4	93.6308	1438774_s_at	ambig	ambig	ambig	Pgm2l1	phosphoglucomutase 2-like 1
3.81334	F	c4.loc90	4	93.6308	1415697_at	5	93.1274	trans	E430034L04Rik	RIKEN cDNA E430034L04 gene
3.17528	F	c4.loc90	4	93.6308	1418031_at	8	74.2017	trans	Myo9b	myosin IXb
3.1523	F	c4.loc90	4	93.6308	1419287_at	8	108.216	trans	Hspc171	HSPC171 protein
4.17724	F	c4.loc90	4	93.6308	1417131_at	9	109.733	trans	Cdc25a	cell division cycle 25 homolog A (S. cerevisiae)
12.2377	F	c4.loc90	4	93.6308	1450967_at	4	87.885	cis	Ptplad2	protein tyrosine phosphatase-like A domain containing 2
3.72185	F	rs13477854	4	94.8678	1436320_at	ambig	ambig	ambig	---	CDNA clone IMAGE:1328649
3.31424	F	rs13477854	4	94.8678	1456050_at	12	16.9954	trans	C80998	expressed sequence C80998
3.18067	F	c4.loc94	4	97.6308	1438366_x_at	8	63.8051	trans	Clcn3	chloride channel 3
7.17726	F	c4.loc94	4	97.6308	1424438_a_at	4	101.146	cis	Leprot	leptin receptor overlapping transcript
3.79738	F	c4.loc96	4	99.6308	1423126_at	9	96.142	trans	Atp1b3	ATPase, Na+/K+ transporting, beta 3 polypeptide
4.36865	F	rs13477875	4	100.871	1417409_at	4	94.5411	cis	Jun	Jun oncogene
3.43377	F	rs6206848	4	101.07	1422525_at	ambig	ambig	ambig	Atp5k	ATP synthase, H+ transporting, mitochondrial F1F0 complex, subunit e
3.46423	F	rs6206848	4	101.07	1450640_x_at	ambig	ambig	ambig	Atp5k	ATP synthase, H+ transporting, mitochondrial F1F0 complex, subunit e
3.74828	F	rs6206848	4	101.07	1423737_at	2	90.6955	trans	Ndufs3	NADH dehydrogenase (ubiquinone) Fe-S protein 3
3.97907	F	rs6206848	4	101.07	1451078_at	4	146.785	trans	2510039O18Rik	RIKEN cDNA 2510039O18 gene
3.23923	F	rs6206848	4	101.07	1429599_a_at	5	92.024	trans	C630010D07Rik /// LOC665563 /// LOC674367	RIKEN cDNA C630010D07 gene /// similar to methylenetetrahydrofolate dehydrogenase (NADP+ dependent) 2-like /// region containing RIKEN cDNA C630010D07 gene; RIKEN cDNA 1110019K23 gene
3.70209	F	rs6206848	4	101.07	1427864_at	13	23.5835	trans	Hist2h3c1 /// Hist1h3d /// Hist1h3b /// Hist1h3e /// Hist2h3b	histone 2, H3c1 /// histone1, H3d /// histone 1, H3b /// histone 1, H3e /// histone 2, H3b
4.31826	F	rs6206848	4	101.07	1421432_at	13	54.5846	trans	Arl10	ADP-ribosylation factor-like 10
3.08541	F	rs6206848	4	101.07	1424071_s_at	13	71.0561	trans	BC018507	cDNA sequence BC018507
3.06204	F	rs6206848	4	101.07	1429425_at	15	58.7294	trans	Rnf139	ring finger protein 139
3.12355	F	rs6206848	4	101.07	1416683_at	15	88.9833	trans	Plxnb2	plexin B2
3.85095	F	rs6206848	4	101.07	1427691_a_at	16	91.2618	trans	Ifnar2	interferon (alpha and beta) receptor 2
3.03177	F	rs6206848	4	101.07	1434896_at	17	32.9185	trans	Zfp422-rs1	zinc finger protein 422, related sequence 1
3.3183	F	rs6310000	4	102.179	1424436_at	16	91.5223	trans	Gart	phosphoribosylglycinamide formyltransferase
4.6791	F	rs6310000	4	102.179	1449710_s_at	18	77.9864	trans	Atp5a1	ATP synthase, H+ transporting, mitochondrial F1 complex, alpha subunit, isoform 1
3.26784	F	rs6310000	4	102.179	1416788_a_at	X	70.0317	trans	Idh3g	isocitrate dehydrogenase 3 (NAD+), gamma
3.60204	F	rs6310000	4	102.179	1433464_at	4	117.392	cis	Ipo13	importin 13
3.19963	F	rs6401724	4	103.014	1437926_at	ambig	ambig	ambig	Xpnpep3	X-prolyl aminopeptidase (aminopeptidase P) 3, putative
3.29655	F	rs6401724	4	103.014	1439841_at	ambig	ambig	ambig	Zfyve27	zinc finger, FYVE domain containing 27
3.71519	F	rs6401724	4	103.014	1428672_at	ambig	ambig	ambig	Snrpf	small nuclear ribonucleoprotein polypeptide F
3.8344	F	rs6401724	4	103.014	1452433_at	ambig	ambig	ambig	---	---
3.58897	F	rs6401724	4	103.014	1417162_at	1	74.2215	trans	Tmbim1	transmembrane BAX inhibitor motif containing 1
3.72624	F	rs6401724	4	103.014	1417254_at	3	37.6118	trans	Spata5	spermatogenesis associated 5
3.14651	F	rs6401724	4	103.014	1419425_at	4	34.2722	trans	Cnr1	cannabinoid receptor 1 (brain)
3.65617	F	rs6401724	4	103.014	1460348_at	4	146.984	trans	Mad2l2	MAD2 mitotic arrest deficient-like 2 (yeast)
3.98245	F	rs6401724	4	103.014	1435522_a_at	5	31.1831	trans	2310016E02Rik	RIKEN cDNA 2310016E02 gene
3.47837	F	rs6401724	4	103.014	1421054_at	14	56.5349	trans	Xpo4	exportin 4
3.20807	F	rs6401724	4	103.014	1423699_at	15	89.1835	trans	D15Ertd785e	DNA segment, Chr 15, ERATO Doi 785, expressed
4.40783	F	rs6401724	4	103.014	1416165_at	17	65.5513	trans	Rab31	RAB31, member RAS oncogene family
19.9063	F	rs6401724	4	103.014	1431067_at	4	106.632	cis	6330404A07Rik	RIKEN cDNA 6330404A07 gene
7.02911	F	rs6401724	4	103.014	1433875_at	4	115.272	cis	4732418C07Rik	RIKEN cDNA 4732418C07 gene
3.1947	F	rs3670371	4	105.299	1432916_at	ambig	ambig	ambig	5730407I07Rik	RIKEN cDNA 5730407I07 gene
3.27914	F	rs3670371	4	105.299	1438242_at	1	89.781	trans	Usp40	ubiquitin specific peptidase 40
3.19768	F	rs3670371	4	105.299	1428032_at	2	58.0899	trans	Acvr1c	activin A receptor, type IC
3.69338	F	rs3670371	4	105.299	1460225_at	14	56.7803	trans	Mrp63	mitochondrial ribosomal protein 63
3.62932	F	rs3670371	4	105.299	1454532_at	4	108.349	cis	C030043A13Rik	RIKEN cDNA C030043A13 gene
40.0193	F	c4.loc102	4	105.631	1418662_at	4	106.637	cis	2210012G02Rik	RIKEN cDNA 2210012G02 gene
12.2841	F	c4.loc104	4	107.631	1452894_at	4	109.702	cis	Elavl4	ELAV (embryonic lethal, abnormal vision, Drosophila)-like 4 (Hu antigen D)
3.01236	F	c4.loc104	4	107.631	1450406_a_at	4	117.43	cis	St3gal3	ST3 beta-galactoside alpha-2,3-sialyltransferase 3
3.94453	F	rs13477912	4	110.386	1430421_a_at	9	21.6714	trans	BC010787	cDNA sequence BC010787
3.13705	F	c4.loc108	4	111.631	1431724_a_at	3	59.305	trans	P2ry12	purinergic receptor P2Y, G-protein coupled 12
3.80158	F	c4.loc110	4	113.631	1450792_at	7	30.1225	trans	Tyrobp	TYRO protein tyrosine kinase binding protein
9.88209	F	c4.loc110	4	113.631	1416042_s_at	4	116.099	cis	Nasp	nuclear autoantigenic sperm protein (histone-binding)
3.4096	F	rs13477927	4	114.784	1423840_at	11	101.094	trans	Ccdc56	coiled-coil domain containing 56
3.45458	F	rs13477927	4	114.784	1437329_at	16	35.0273	trans	Ptplb	protein tyrosine phosphatase-like (proline instead of catalytic arginine), member b
7.75312	F	rs13477927	4	114.784	1428741_at	4	109.702	cis	Elavl4	ELAV (embryonic lethal, abnormal vision, Drosophila)-like 4 (Hu antigen D)
7.16278	F	rs13477927	4	114.784	1436358_at	4	115.311	cis	Atpaf1	ATP synthase mitochondrial F1 complex assembly factor 1
3.30329	F	rs13477931	4	115.65	1457322_at	ambig	ambig	ambig	C1qb	Complement component 1, q subcomponent, beta polypeptide
3.33581	F	rs13477931	4	115.65	1420620_a_at	3	57.824	trans	Rnf13	ring finger protein 13
4.06907	F	rs13477931	4	115.65	1417381_at	4	136.168	trans	C1qa	complement component 1, q subcomponent, alpha polypeptide
3.07892	F	rs13477931	4	115.65	1428988_at	11	94.1594	trans	Abcc3	ATP-binding cassette, sub-family C (CFTR/MRP), member 3
4.9648	F	rs13477931	4	115.65	1428116_a_at	17	6.36437	trans	Dynlt1	dynein light chain Tctex-type 1
3.11952	F	rs13477931	4	115.65	1449925_at	X	97.9343	trans	Cxcr3	chemokine (C-X-C motif) receptor 3
4.01183	F	rs13477931	4	115.65	1451350_a_at	4	101.146	cis	Leprot	leptin receptor overlapping transcript
12.3439	F	rs13477931	4	115.65	1434934_at	4	115.283	cis	Atpaf1	ATP synthase mitochondrial F1 complex assembly factor 1
18.0243	F	rs13477931	4	115.65	1449113_at	4	116.079	cis	Gpbp1l1	GC-rich promoter binding protein 1-like 1
9.95732	F	rs13477931	4	115.65	1436691_x_at	4	116.197	cis	Prdx1	peroxiredoxin 1
3.37946	F	rs13477940	4	117.713	1437726_x_at	ambig	ambig	ambig	C1qb	complement component 1, q subcomponent, beta polypeptide
3.2094	F	rs13477940	4	117.713	1437391_x_at	1	79.6602	trans	Mrpl44	mitochondrial ribosomal protein L44
3.21715	F	rs13477940	4	117.713	1431861_a_at	3	145.056	trans	Odf2l	outer dense fiber of sperm tails 2-like
3.22258	F	rs13477940	4	117.713	1420535_a_at	5	24.196	trans	Nub1	negative regulator of ubiquitin-like proteins 1
3.66485	F	rs13477940	4	117.713	1416417_a_at	8	86.4568	trans	Ndufb7	NADH dehydrogenase (ubiquinone) 1 beta subcomplex, 7
5.17865	F	rs13477940	4	117.713	1458897_at	10	7.89494	trans	Ust	uronyl-2-sulfotransferase
3.02295	F	rs13477940	4	117.713	1437014_x_at	4	116.197	cis	LOC545161 /// LOC637273	similar to Peroxiredoxin 1 (Thioredoxin peroxidase 2) (Thioredoxin-dependent peroxide reductase 2) (Osteoblast specific factor 3) (OSF-3) (Macrophage 23 kDa stress protein) /// similar to Peroxiredoxin-1 (Thioredoxin peroxidase 2) (Thioredoxin-dependent peroxide reductase 2) (Osteoblast-specific factor 3) (OSF-3) (Macrophage 23 kDa stress protein)
4.02799	F	rs13477940	4	117.713	1416769_s_at	4	117.382	cis	Atp6v0b	ATPase, H+ transporting, lysosomal V0 subunit B
3.2393	F	rs13477940	4	117.713	1421915_a_at	4	117.43	cis	St3gal3	ST3 beta-galactoside alpha-2,3-sialyltransferase 3
22.843	F	rs13477940	4	117.713	1442417_at	4	117.913	cis	Med8	mediator of RNA polymerase II transcription, subunit 8 homolog (yeast)
3.30736	F	rs13477940	4	117.713	1434366_x_at	4	136.152	cis	C1qb	complement component 1, q subcomponent, beta polypeptide
3.26761	F	rs6348991	4	117.9	1434053_x_at	5	108.674	trans	Atp5k	ATP synthase, H+ transporting, mitochondrial F1F0 complex, subunit e
4.25255	F	rs6348991	4	117.9	1433429_at	11	78.1527	trans	Pigs	phosphatidylinositol glycan anchor biosynthesis, class S
3.1296	F	rs13477943	4	118.876	1451160_s_at	ambig	ambig	ambig	Pvr	poliovirus receptor
3.03703	F	rs13477943	4	118.876	1418704_at	3	90.6004	trans	S100a13	S100 calcium binding protein A13
3.12997	F	rs13477943	4	118.876	1426237_at	11	96.7694	trans	Sp2	Sp2 transcription factor
3.33855	F	rs13477943	4	118.876	1456045_at	17	85.3605	trans	1700106N22Rik	RIKEN cDNA 1700106N22 gene
14.2871	F	rs13477943	4	118.876	1438220_at	4	119.118	cis	Foxj3	forkhead box J3
4.56215	F	rs13477943	4	118.876	1429134_at	4	119.231	cis	Hivep3	human immunodeficiency virus type I enhancer binding protein 3
3.1835	F	rs13477943	4	118.876	1424639_a_at	4	135.219	cis	Hmgcl	3-hydroxy-3-methylglutaryl-Coenzyme A lyase
3.12603	F	rs6319522	4	119.591	1448003_at	11	119.915	trans	---	---
6.67569	F	rs6319522	4	119.591	1422467_at	4	122.339	cis	Ppt1	palmitoyl-protein thioesterase 1
5.87163	F	rs13477946	4	119.875	1432447_a_at	ambig	ambig	ambig	2310005N01Rik	RIKEN cDNA 2310005N01 gene
3.982	F	rs13477946	4	119.875	1456312_x_at	2	35.1296	trans	Gsn	gelsolin
3.10983	F	rs13477946	4	119.875	1418072_at	13	23.6917	trans	Hist1h2bc	histone 1, H2bc
3.09517	F	rs13477946	4	119.875	1459773_x_at	4	124.576	cis	Snip1	Smad nuclear interacting protein 1
3.46828	F	rs13477952	4	121.836	1448963_at	ambig	ambig	ambig	Nfyc	nuclear transcription factor-Y gamma
3.21783	F	rs13477952	4	121.836	1426926_at	8	120.466	trans	Plcg2	phospholipase C, gamma 2
3.39927	F	rs13477952	4	121.836	1433503_at	12	85.2049	trans	Zadh1	zinc binding alcohol dehydrogenase, domain containing 1
3.00756	F	rs13477952	4	121.836	1451137_a_at	18	34.7246	trans	Brd8	bromodomain containing 8
4.33179	F	rs13477952	4	121.836	1448354_at	X	70.6622	trans	G6pdx	glucose-6-phosphate dehydrogenase X-linked
10.1668	F	rs13477952	4	121.836	1453639_s_at	4	116.207	cis	0610037D15Rik	RIKEN cDNA 0610037D15 gene
17.8419	F	rs13477952	4	121.836	1442124_at	4	118.718	cis	AI450326	expressed sequence AI450326
7.09227	F	rs13477952	4	121.836	1441573_at	4	119.958	cis	Scmh1	Sex comb on midleg homolog 1
35.3374	F	rs13477952	4	121.836	1417462_at	4	122.361	cis	Cap1	CAP, adenylate cyclase-associated protein 1 (yeast)
40.599	F	rs13477952	4	121.836	1417461_at	4	122.361	cis	Cap1	CAP, adenylate cyclase-associated protein 1 (yeast)
6.66743	F	rs13477952	4	121.836	1429485_a_at	4	124.18	cis	Utp11l	UTP11-like, U3 small nucleolar ribonucleoprotein, (yeast)
20.8122	F	c4.loc120	4	123.631	1454913_at	ambig	ambig	ambig	9930104L06Rik	RIKEN cDNA 9930104L06 gene
12.6693	F	c4.loc120	4	123.631	1451330_a_at	4	124.244	cis	Inpp5b	inositol polyphosphate-5-phosphatase B
10.5018	F	c4.loc120	4	123.631	1455545_at	4	124.352	cis	1110065P20Rik	RIKEN cDNA 1110065P20 gene
8.49186	F	c4.loc120	4	123.631	1437566_at	4	124.555	cis	LOC633966	similar to guanine nucleotide binding protein-like 2 (nucleolar)
3.00607	F	rs3657938	4	124.541	1460010_a_at	ambig	ambig	ambig	Ptdss2	phosphatidylserine synthase 2
3.06785	F	rs3657938	4	124.541	1435092_at	ambig	ambig	ambig	Arl4a	ADP-ribosylation factor-like 4A
3.313	F	rs3657938	4	124.541	1452506_a_at	1	93.2068	trans	Ilkap	integrin-linked kinase-associated serine/threonine phosphatase 2C
3.13983	F	rs3657938	4	124.541	1429961_at	3	88.3687	trans	1700021C14Rik	RIKEN cDNA 1700021C14 gene
3.26272	F	rs3657938	4	124.541	1426776_at	6	24.5638	trans	Wasl	Wiskott-Aldrich syndrome-like (human)
3.17901	F	rs3657938	4	124.541	1448867_at	7	109.527	trans	Tmem9b	TMEM9 domain family, member B
3.67258	F	rs3657938	4	124.541	1454268_a_at	8	125.311	trans	Cyba	cytochrome b-245, alpha polypeptide
3.89611	F	rs3657938	4	124.541	1422457_s_at	10	77.0499	trans	Sumo3	SMT3 suppressor of mif two 3 homolog 3 (yeast)
3.03571	F	rs3657938	4	124.541	1452440_at	11	69.5022	trans	Tnfsf12 /// Tnfsf12-tnfsf13	tumor necrosis factor (ligand) superfamily, member 12 /// tumor necrosis factor (ligand) superfamily, member 12-member 13
3.00622	F	rs3657938	4	124.541	1434191_at	12	37.9162	trans	A530016O06Rik	RIKEN cDNA A530016O06 gene
3.70418	F	rs3657938	4	124.541	1458679_a_at	15	58.7311	trans	Tatdn1	TatD DNase domain containing 1
3.16454	F	rs3657938	4	124.541	1454641_at	16	64.7984	trans	Cggbp1	CGG triplet repeat binding protein 1
3.44369	F	rs3657938	4	124.541	1453198_at	17	32.9156	trans	Zfp422-rs1	zinc finger protein 422, related sequence 1
3.05343	F	rs3657938	4	124.541	1438562_a_at	18	67.7909	trans	Ptpn2	protein tyrosine phosphatase, non-receptor type 2
3.15938	F	rs3657938	4	124.541	1451035_a_at	4	116.134	cis	Akr1a4	aldo-keto reductase family 1, member A4 (aldehyde reductase)
3.79649	F	rs3657938	4	124.541	1452647_a_at	4	117.387	cis	Dph2	DPH2 homolog (S. cerevisiae)
16.1126	F	rs3657938	4	124.541	1428133_at	4	124.569	cis	Snip1	Smad nuclear interacting protein 1
6.21795	F	rs3657938	4	124.541	1434193_at	4	126.631	cis	Zmym6	zinc finger, MYM-type 6
4.51353	F	rs3657938	4	124.541	1428675_at	4	135.248	cis	1110049F12Rik	RIKEN cDNA 1110049F12 gene
17.5807	F	c4.loc122	4	125.631	1425043_s_at	4	116.207	cis	0610037D15Rik	RIKEN cDNA 0610037D15 gene
3.30125	F	rs13477968	4	126.311	1437945_x_at	ambig	ambig	ambig	Nap1l1	nucleosome assembly protein 1-like 1
3.30412	F	rs13477968	4	126.311	1447508_at	ambig	ambig	ambig	---	Transcribed locus
3.53452	F	rs13477968	4	126.311	1436037_at	2	79.1333	trans	Cerkl	ceramide kinase-like
3.52578	F	rs13477968	4	126.311	1426240_at	2	154.349	trans	Chmp4b	chromatin modifying protein 4B
4.19118	F	rs13477968	4	126.311	1455548_at	2	156.454	trans	Dlgap4	discs, large homolog-associated protein 4 (Drosophila)
3.1515	F	rs13477968	4	126.311	1437618_x_at	6	13.7851	trans	Gpr85	G protein-coupled receptor 85
3.19124	F	rs13477968	4	126.311	1419206_at	7	45.1017	trans	Cd37	CD37 antigen
3.23873	F	rs13477968	4	126.311	1434489_at	8	108.195	trans	Elmo3	engulfment and cell motility 3, ced-12 homolog (C. elegans)
3.46006	F	rs13477968	4	126.311	1425460_at	9	13.4988	trans	Mtmr2	myotubularin related protein 2
3.77097	F	rs13477968	4	126.311	1418192_at	11	74.6471	trans	Mnt	max binding protein
4.03368	F	rs13477968	4	126.311	1426811_at	19	6.22776	trans	Ppp2r5b	protein phosphatase 2, regulatory subunit B (B56), beta isoform
6.4754	F	rs13477968	4	126.311	1428481_s_at	4	124.421	cis	Cdca8	cell division cycle associated 8
8.09454	F	rs13477968	4	126.311	1436847_s_at	4	124.421	cis	Cdca8	cell division cycle associated 8
3.48197	F	rs13477968	4	126.311	1448770_a_at	4	131.803	cis	Atpif1	ATPase inhibitory factor 1
3.20524	F	rs13477972	4	127.166	1448333_at	ambig	ambig	ambig	Adprh	ADP-ribosylarginine hydrolase
3.645	F	rs13477972	4	127.166	1437979_at	1	107.82	trans	Zcchc2	Zinc finger, CCHC domain containing 2
3.45539	F	rs13477972	4	127.166	1425869_a_at	1	182.064	trans	Psen2	presenilin 2
3.97709	F	rs13477972	4	127.166	1417529_at	X	44.7639	trans	Rab33a	RAB33A, member of RAS oncogene family
3.10391	F	rs13477972	4	127.166	1452683_at	4	131.808	cis	Dnajc8 /// LOC669266	DnaJ (Hsp40) homolog, subfamily C, member 8 /// similar to DnaJ (Hsp40) homolog, subfamily C, member 8 (predicted)
15.0604	F	c4.loc124	4	127.631	1422179_at	4	126.854	cis	Gjb4	gap junction membrane channel protein beta 4
3.10762	F	c4.loc126	4	129.631	1439424_x_at	ambig	ambig	ambig	Herpud2	HERPUD family member 2
3.32945	F	c4.loc126	4	129.631	1450494_x_at	7	25.1721	trans	Ceacam1	CEA-related cell adhesion molecule 1
4.69834	F	c4.loc126	4	129.631	1417756_a_at	7	142.281	trans	Lsp1	lymphocyte specific 1
3.176	F	c4.loc126	4	129.631	1429896_at	10	9.31313	trans	5830408B19Rik	RIKEN cDNA 5830408B19 gene
3.12019	F	c4.loc126	4	129.631	1448258_a_at	14	29.8288	trans	Spcs1	signal peptidase complex subunit 1 homolog (S. cerevisiae)
5.84014	F	c4.loc126	4	129.631	1432488_a_at	4	124.217	cis	Sf3a3 /// LOC626830	splicing factor 3a, subunit 3 /// similar to splicing factor 3a, subunit 3 (predicted)
3.32059	F	c4.loc126	4	129.631	1426579_at	4	124.519	cis	Gnl2	guanine nucleotide binding protein-like 2 (nucleolar)
4.5503	F	c4.loc128	4	131.631	1427274_at	9	45.6145	trans	D130054N24Rik	RIKEN cDNA D130054N24 gene
3.53922	F	rs13477989	4	132.45	1434733_at	1	74.5676	trans	Stk36	serine/threonine kinase 36 (fused homolog, Drosophila)
3.04653	F	rs13477989	4	132.45	1422418_s_at	11	87.5538	trans	Supt4h1 /// Supt4h2	suppressor of Ty 4 homolog 1 (S. cerevisiae) /// suppressor of Ty 4 homolog 2 (S. cerevisiae)
3.31164	F	rs13477989	4	132.45	1451401_a_at	4	137.707	cis	0610009K11Rik	RIKEN cDNA 0610009K11 gene
8.42428	F	rs13477991	4	132.735	1416493_at	4	137.577	cis	Ddost	dolichyl-di-phosphooligosaccharide-protein glycotransferase
6.31589	F	rs13477991	4	132.735	1419309_at	4	142.534	cis	Pdpn	podoplanin
8.8356	F	rs13477994	4	133.594	1426387_x_at	ambig	ambig	ambig	4933439C20Rik /// Pisd	RIKEN cDNA 4933439C20 gene /// phosphatidylserine decarboxylase
14.5329	F	rs13477994	4	133.594	1435353_a_at	ambig	ambig	ambig	4933439C20Rik	RIKEN cDNA 4933439C20 gene
3.04631	F	rs13477994	4	133.594	1455940_x_at	ambig	ambig	ambig	Wdr6	WD repeat domain 6
4.89437	F	rs13477994	4	133.594	1433507_a_at	ambig	ambig	ambig	Hmgn2	high mobility group nucleosomal binding domain 2
3.50197	F	rs13477994	4	133.594	1423843_at	6	48.4844	trans	Lrrc61	leucine rich repeat containing 61
6.76075	F	rs13477994	4	133.594	1436944_x_at	11	3.03169	trans	4933439C20Rik	RIKEN cDNA 4933439C20 gene
4.06349	F	rs13477994	4	133.594	1435472_at	11	5.09155	trans	Kremen1	kringle containing transmembrane protein 1
3.60074	F	rs13477994	4	133.594	1449429_at	12	4.85552	trans	Fkbp1b	FK506 binding protein 1b
3.25941	F	rs13477994	4	133.594	1424226_at	12	101.187	trans	9030617O03Rik	RIKEN cDNA 9030617O03 gene
3.97918	F	rs13477994	4	133.594	1452176_at	13	46.6909	trans	Nup153	nucleoporin 153
3.39529	F	rs13477994	4	133.594	1447952_at	13	52.9226	trans	Auh	AU RNA binding protein/enoyl-coenzyme A hydratase
3.45744	F	rs13477994	4	133.594	1417192_at	16	57.0431	trans	Tomm70a	translocase of outer mitochondrial membrane 70 homolog A (yeast)
4.37293	F	rs13477994	4	133.594	1453155_at	4	134.17	cis	Tmem50a	transmembrane protein 50A
6.35404	F	rs13477994	4	133.594	1434027_at	4	134.684	cis	Dscr1l2	Down syndrome critical region gene 1-like 2
3.27192	F	c4.loc130	4	133.631	1435238_x_at	9	72.8368	trans	2310009A05Rik	RIKEN cDNA 2310009A05 gene
16.3603	F	c4.loc130	4	133.631	1458060_at	4	134.014	cis	---	10 days lactation, adult female mammary gland cDNA, RIKEN full-length enriched library, clone:D730006C24 product:unclassifiable, full insert sequence
3.4148	F	c4.loc132	4	135.631	1434214_at	5	138.486	trans	0910001L09Rik	RIKEN cDNA 0910001L09 gene
3.19893	F	c4.loc132	4	135.631	1435372_a_at	10	127.962	trans	Pa2g4	proliferation-associated 2G4
3.34385	F	c4.loc132	4	135.631	1435766_at	15	93.2265	trans	Pphln1	periphilin 1
8.18877	F	c4.loc132	4	135.631	1442804_at	4	132.273	cis	Fgr	Gardner-Rasheed feline sarcoma viral (Fgr) oncogene homolog
4.68135	F	rs13478011	4	137.216	1458504_at	ambig	ambig	ambig	Zc3h12d	zinc finger CCCH type containing 12D
5.53355	F	rs13478011	4	137.216	1430687_at	ambig	ambig	ambig	6330545A04Rik	RIKEN cDNA 6330545A04 gene
3.29381	F	rs13478011	4	137.216	1417922_at	2	90.7056	trans	Kbtbd4	kelch repeat and BTB (POZ) domain containing 4
3.12453	F	rs13478011	4	137.216	1426962_at	2	155.888	trans	Phf20	PHD finger protein 20
3.53558	F	rs13478011	4	137.216	1439932_at	4	6.14814	trans	3110003A22Rik	RIKEN cDNA 3110003A22 gene
6.09986	F	rs13478011	4	137.216	1416522_a_at	6	124.705	trans	Grcc10	gene rich cluster, C10 gene
4.29147	F	rs13478011	4	137.216	1424038_a_at	7	44.358	trans	2310044H10Rik	RIKEN cDNA 2310044H10 gene
3.89779	F	rs13478011	4	137.216	1417253_at	8	42.8963	trans	Frg1	FSHD region gene 1
21.4642	F	rs13478011	4	137.216	1439845_at	4	137.516	cis	---	Transcribed locus
12.9045	F	rs13478011	4	137.216	1451148_at	4	137.585	cis	Pink1	PTEN induced putative kinase 1
25.7149	F	rs13478011	4	137.216	1441937_s_at	4	137.585	cis	Pink1	PTEN induced putative kinase 1
8.83807	F	rs13459080	4	140.079	1434975_x_at	ambig	ambig	ambig	4933439C20Rik	RIKEN cDNA 4933439C20 gene
3.40789	F	rs13459080	4	140.079	1446122_at	6	148.172	trans	4732416N19Rik	RIKEN cDNA 4732416N19 gene
3.87098	F	rs13459080	4	140.079	1452937_s_at	4	129.122	cis	Ccdc28b	coiled coil domain containing 28B
16.63	F	rs13459080	4	140.079	1434118_at	4	137.712	cis	0610009K11Rik	RIKEN cDNA 0610009K11 gene
12.441	F	rs13459080	4	140.079	1426125_a_at	4	141.066	cis	Casp9	caspase 9
3.10743	F	rs8260738	4	140.705	1438361_at	ambig	ambig	ambig	2310035C23Rik	RIKEN cDNA 2310035C23 gene
3.23316	F	rs8260738	4	140.705	1442407_at	ambig	ambig	ambig	---	---
3.26757	F	rs8260738	4	140.705	1442982_at	ambig	ambig	ambig	Ccdc66	coiled-coil domain containing 66
3.48409	F	rs8260738	4	140.705	1453099_at	8	98.3384	trans	Csnk2a2	casein kinase 2, alpha prime polypeptide
4.44497	F	rs8260738	4	140.705	1418962_at	4	140.339	cis	Necap2	NECAP endocytosis associated 2
6.79951	F	rs8260738	4	140.705	1416224_at	4	140.717	cis	Zbtb17	zinc finger and BTB domain containing 17
13.4365	F	rs8260738	4	140.705	1436209_at	4	141.034	cis	Dnajc16	DnaJ (Hsp40) homolog, subfamily C, member 16
15.8565	F	rs3711383	4	141.224	1437537_at	ambig	ambig	ambig	Casp9	caspase 9
3.02333	F	rs3711383	4	141.224	1427063_at	3	108.586	trans	5330417C22Rik	RIKEN cDNA 5330417C22 gene
3.61971	F	rs3711383	4	141.224	1449578_at	14	51.0824	trans	Supt16h	suppressor of Ty 16 homolog (S. cerevisiae)
6.47581	F	rs3711383	4	141.224	1426833_at	4	137.398	cis	Eif4g3	eukaryotic translation initiation factor 4 gamma, 3
33.6449	F	rs3711383	4	141.224	1418569_at	4	140.848	cis	Fblim1	filamin binding LIM protein 1
44.6088	F	rs3711383	4	141.224	1449141_at	4	140.848	cis	Fblim1	filamin binding LIM protein 1
17.5011	F	rs3711383	4	141.224	1434781_at	4	141.032	cis	---	---
6.59696	F	rs3711383	4	141.224	1431339_a_at	4	141.131	cis	Efhd2	EF hand domain containing 2
17.9501	F	rs13478027	4	141.459	1428778_at	ambig	ambig	ambig	Sfi1	Sfi1 homolog, spindle assembly associated (yeast)
3.19306	F	rs13478027	4	141.459	1425455_a_at	ambig	ambig	ambig	Churc1	churchill domain containing 1
4.52621	F	rs13478027	4	141.459	1454904_at	ambig	ambig	ambig	Mtm1	X-linked myotubular myopathy gene 1
8.33085	F	rs13478027	4	141.459	1439069_a_at	ambig	ambig	ambig	4933439C20Rik	RIKEN cDNA 4933439C20 gene
3.09721	F	rs13478027	4	141.459	1436910_at	1	159.011	trans	Rasal2	RAS protein activator like 2
3.36325	F	rs13478027	4	141.459	1460635_at	5	23.9511	trans	Fastk	Fas-activated serine/threonine kinase
3.13463	F	rs13478027	4	141.459	1456691_s_at	5	77.2297	trans	Srd5a2l	steroid 5 alpha-reductase 2-like
3.37593	F	rs13478027	4	141.459	1448682_at	5	115.559	trans	Dynll1	dynein light chain LC8-type 1
3.14515	F	rs13478027	4	141.459	1427039_at	7	4.68334	trans	Epn1	epsin 1
3.74636	F	rs13478027	4	141.459	1419193_a_at	7	28.1462	trans	Gmfg	glia maturation factor, gamma
3.09806	F	rs13478027	4	141.459	1422858_at	9	65.6291	trans	Trip4	thyroid hormone receptor interactor 4
3.17781	F	rs13478027	4	141.459	1438196_at	9	114.748	trans	Gpd1l	glycerol-3-phosphate dehydrogenase 1-like
5.09973	F	rs13478027	4	141.459	1438045_at	10	95.4721	trans	Eea1	early endosome antigen 1
3.59846	F	rs13478027	4	141.459	1448577_x_at	11	117.626	trans	Syngr2	synaptogyrin 2
3.19944	F	rs13478027	4	141.459	1454663_at	12	111.986	trans	Eif5	eukaryotic translation initiation factor 5
3.11977	F	rs13478027	4	141.459	1417267_s_at	15	98.5524	trans	Fkbp11	FK506 binding protein 11
3.2876	F	rs13478027	4	141.459	1450808_at	17	17.5811	trans	Fpr1	formyl peptide receptor 1
3.27601	F	rs13478027	4	141.459	1449222_at	17	55.5459	trans	Ebi3	Epstein-Barr virus induced gene 3
3.07557	F	rs13478027	4	141.459	1426244_at	18	23.947	trans	Mapre2	microtubule-associated protein, RP/EB family, member 2
3.17155	F	rs13478027	4	141.459	1426567_a_at	18	80.4154	trans	Pqlc1	PQ loop repeat containing 1
6.1866	F	rs13478027	4	141.459	1455075_at	4	132.933	cis	Pigv	phosphatidylinositol glycan anchor biosynthesis, class V
4.21819	F	rs13478027	4	141.459	1415751_at	4	137.489	cis	Hp1bp3	heterochromatin protein 1, binding protein 3
9.34744	F	rs13478027	4	141.459	1451528_at	4	140.886	cis	BC025833	cDNA sequence BC025833
4.1225	F	rs13478027	4	141.459	1429251_at	4	142.394	cis	Prdm2	PR domain containing 2, with ZNF domain
4.15587	F	rs13478027	4	141.459	1433916_at	4	149.891	cis	Vamp3	vesicle-associated membrane protein 3
6.72818	F	rs13478027	4	141.459	1456245_x_at	4	149.891	cis	Vamp3	vesicle-associated membrane protein 3
28.2401	F	c4.loc138	4	141.631	1452195_s_at	ambig	ambig	ambig	Sfi1 /// LOC673420	Sfi1 homolog, spindle assembly associated (yeast) /// similar to spindle assembly associated Sfi1 homolog isoform b
32.9948	F	c4.loc138	4	141.631	1426787_at	ambig	ambig	ambig	Sfi1 /// LOC673404 /// LOC673420 /// LOC673566	Sfi1 homolog, spindle assembly associated (yeast) /// similar to spindle assembly associated Sfi1 homolog isoform b /// similar to spindle assembly associated Sfi1 homolog isoform b /// similar to Sfi1 homolog, spindle assembly associated (yeast)
3.74583	F	c4.loc138	4	141.631	1432832_at	7	72.9982	trans	4933435G04Rik	RIKEN cDNA 4933435G04 gene
3.77021	F	c4.loc138	4	141.631	1428187_at	16	49.8335	trans	Cd47	CD47 antigen (Rh-related antigen, integrin-associated signal transducer)
19.5483	F	c4.loc138	4	141.631	1416289_at	4	146.754	cis	Plod1	procollagen-lysine, 2-oxoglutarate 5-dioxygenase 1
4.34475	F	rs3023687	4	142.185	1459868_x_at	ambig	ambig	ambig	Il11ra1 /// Il11ra2 /// LOC621887	interleukin 11 receptor, alpha chain 1 /// interleukin 11 receptor, alpha chain 2 /// similar to interleukin 11 receptor, alpha chain 2
3.18717	F	rs3023687	4	142.185	1436336_at	2	32.5978	trans	Ptrh1	peptidyl-tRNA hydrolase 1 homolog (S. cerevisiae)
3.25377	F	rs3023687	4	142.185	1420033_s_at	7	138.721	trans	Ppp2r2d	protein phosphatase 2, regulatory subunit B, delta isoform
3.16868	F	rs3023687	4	142.185	1430378_at	14	76.5579	trans	2900011G08Rik	RIKEN cDNA 2900011G08 gene
4.95643	F	rs3023687	4	142.185	1428796_at	16	50.1111	trans	5530401J07Rik	RIKEN cDNA 5530401J07 gene
6.03132	F	rs3023687	4	142.185	1455790_at	4	135.465	cis	E2f2	E2F transcription factor 2
26.6357	F	rs13478028	4	142.335	1447901_x_at	ambig	ambig	ambig	Sfi1 /// LOC673420 /// LOC673566	Sfi1 homolog, spindle assembly associated (yeast) /// similar to spindle assembly associated Sfi1 homolog isoform b /// similar to Sfi1 homolog, spindle assembly associated (yeast)
7.64392	F	rs13478028	4	142.335	1446483_at	ambig	ambig	ambig	Akr1e1	aldo-keto reductase family 1, member E1
27.6185	F	rs13478028	4	142.335	1440144_x_at	ambig	ambig	ambig	C330046E03	hypothetical protein C330046E03
4.49891	F	rs13478028	4	142.335	1421827_at	2	119.017	trans	Dll4	delta-like 4 (Drosophila)
3.16124	F	rs13478028	4	142.335	1456143_at	2	165.518	trans	Prkcbp1	protein kinase C binding protein 1
3.40737	F	rs13478028	4	142.335	1416539_at	9	37.3635	trans	Siae	sialic acid acetylesterase
3.79653	F	rs13478028	4	142.335	1424011_at	9	70.9092	trans	Aqp9	aquaporin 9
3.57539	F	rs13478028	4	142.335	1449107_at	10	94.9767	trans	Nudt4	nudix (nucleoside diphosphate linked moiety X)-type motif 4
5.44118	F	rs13478028	4	142.335	1434566_a_at	4	142.687	cis	4732496O08Rik	RIKEN cDNA 4732496O08 gene
33.2107	F	rs13478031	4	143.446	1417826_at	ambig	ambig	ambig	Akr1e1	aldo-keto reductase family 1, member E1
3.90521	F	rs13478031	4	143.446	1419449_a_at	ambig	ambig	ambig	Gnai2	guanine nucleotide binding protein, alpha inhibiting 2
13.8479	F	rs13478031	4	143.446	1428604_at	ambig	ambig	ambig	2610305D13Rik	RIKEN cDNA 2610305D13 gene
28.7076	F	rs13478031	4	143.446	1426074_at	ambig	ambig	ambig	LOC434536	LOC434536
4.02346	F	rs13478031	4	143.446	1424194_at	1	167.486	trans	Rcsd1	RCSD domain containing 1
3.87177	F	rs13478031	4	143.446	1458518_at	5	43.5756	trans	Cpeb2	cytoplasmic polyadenylation element binding protein 2
3.0636	F	rs13478031	4	143.446	1435464_at	5	65.726	trans	1110003E01Rik	RIKEN cDNA 1110003E01 gene
3.80485	F	rs13478031	4	143.446	1437020_at	5	110.968	trans	Ep400	E1A binding protein p400
3.42067	F	rs13478031	4	143.446	1428195_at	6	29.7185	trans	4631427C17Rik	RIKEN cDNA 4631427C17 gene
3.18215	F	rs13478031	4	143.446	1416837_at	7	45.3297	trans	Bax	Bcl2-associated X protein
4.39962	F	rs13478031	4	143.446	1435315_s_at	7	113.362	trans	2900034E22Rik	RIKEN cDNA 2900034E22 gene
3.13064	F	rs13478031	4	143.446	1425745_a_at	7	130.52	trans	Tacc2	transforming, acidic coiled-coil containing protein 2
4.03616	F	rs13478031	4	143.446	1418553_at	8	3.45511	trans	Arhgef18	rho/rac guanine nucleotide exchange factor (GEF) 18
3.2589	F	rs13478031	4	143.446	1424062_at	10	70.6503	trans	Ube2d1	ubiquitin-conjugating enzyme E2D 1, UBC4/5 homolog (yeast)
3.3147	F	rs13478031	4	143.446	1417639_at	11	53.8265	trans	Slc22a4	solute carrier family 22 (organic cation transporter), member 4
3.34752	F	rs13478031	4	143.446	1435183_at	11	96.9523	trans	Tbkbp1	TBK1 binding protein 1
3.40113	F	rs13478031	4	143.446	1424533_a_at	11	120.274	trans	3110023B02Rik	RIKEN cDNA 3110023B02 gene
3.17924	F	rs13478031	4	143.446	1436052_at	12	87.1791	trans	1700020O03Rik	RIKEN cDNA 1700020O03 gene
3.02159	F	rs13478031	4	143.446	1440778_x_at	13	67.4735	trans	Zfp712	Zinc finger protein 712
3.33194	F	rs13478031	4	143.446	1451174_at	16	32.0625	trans	Lrrc33	leucine rich repeat containing 33
3.5874	F	rs13478031	4	143.446	1431177_a_at	17	28.0568	trans	Rpl10a	ribosomal protein L10A
3.36366	F	rs13478031	4	143.446	1421987_at	19	32.6849	trans	Papss2	3'-phosphoadenosine 5'-phosphosulfate synthase 2
3.14241	F	rs13478031	4	143.446	1452024_a_at	19	46.0862	trans	Ldb1	LIM domain binding 1
3.39995	F	rs13478031	4	143.446	1434567_at	4	142.687	cis	4732496O08Rik	RIKEN cDNA 4732496O08 gene
6.9597	F	rs13478031	4	143.446	1422965_at	4	146.924	cis	Agtrap	angiotensin II, type I receptor-associated protein
12.2003	F	rs13478031	4	143.446	1424213_at	4	147.278	cis	Ubiad1	UbiA prenyltransferase domain containing 1
3.14898	F	c4.loc140	4	143.631	1456617_a_at	ambig	ambig	ambig	Eif2s2	eukaryotic translation initiation factor 2, subunit 2 (beta)
3.04492	F	c4.loc140	4	143.631	1448140_at	8	97.7112	trans	Ciapin1	cytokine induced apoptosis inhibitor 1
3.2076	F	c4.loc140	4	143.631	1455483_at	16	33.4211	trans	Zfp148	zinc finger protein 148
6.1543	F	c4.loc140	4	143.631	1417100_at	17	33.4492	trans	Cd320	CD320 antigen
3.28576	F	c4.loc140	4	143.631	1448524_s_at	X	70.0398	trans	Ssr4	signal sequence receptor, delta
3.02341	F	c4.loc142	4	145.631	1426069_s_at	ambig	ambig	ambig	Slc7a4	solute carrier family 7 (cationic amino acid transporter, y+ system), member 4
3.19304	F	c4.loc142	4	145.631	1443816_s_at	ambig	ambig	ambig	BB220380	expressed sequence BB220380
4.20915	F	c4.loc142	4	145.631	1440882_at	ambig	ambig	ambig	Lrp8	low density lipoprotein receptor-related protein 8, apolipoprotein e receptor
24.7462	F	c4.loc142	4	145.631	1425113_x_at	ambig	ambig	ambig	---	PREDICTED: Mus musculus hypothetical protein LOC621686 (LOC621686), mRNA
4.23047	F	c4.loc142	4	145.631	1434310_at	1	59.8197	trans	Bmpr2	bone morphogenic protein receptor, type II (serine/threonine kinase)
3.46812	F	c4.loc142	4	145.631	1422478_a_at	2	155.209	trans	Acss2	acyl-CoA synthetase short-chain family member 2
3.86566	F	c4.loc142	4	145.631	1422479_at	2	155.209	trans	Acss2	acyl-CoA synthetase short-chain family member 2
4.17276	F	c4.loc142	4	145.631	1420382_at	7	126.376	trans	Apob48r	apolipoprotein B48 receptor
3.09539	F	c4.loc142	4	145.631	1418944_at	X	102.779	trans	Cysltr1	cysteinyl leukotriene receptor 1
5.47553	F	c4.loc142	4	145.631	1419526_at	4	132.246	cis	Fgr	Gardner-Rasheed feline sarcoma viral (Fgr) oncogene homolog
15.0527	F	c4.loc142	4	145.631	1438646_x_at	4	146.791	cis	2510039O18Rik	RIKEN cDNA 2510039O18 gene
30.9149	F	c4.loc142	4	145.631	1460596_at	4	146.921	cis	Agtrap	angiotensin II, type I receptor-associated protein
5.98803	F	rs13478040	4	146.557	1458517_at	ambig	ambig	ambig	Akr1e1	Aldo-keto reductase family 1, member E1
9.61146	F	rs13478040	4	146.557	1439070_x_at	ambig	ambig	ambig	4933439C20Rik /// D030013I16Rik	RIKEN cDNA 4933439C20 gene /// RIKEN cDNA D030013I16 gene
4.19267	F	rs13478040	4	146.557	1447227_at	1	45.8662	trans	Slc40a1	Solute carrier family 40 (iron-regulated transporter), member 1
3.78064	F	rs13478040	4	146.557	1448670_at	2	78.6697	trans	Ube2e3	ubiquitin-conjugating enzyme E2E 3, UBC4/5 homolog (yeast)
3.96011	F	rs13478040	4	146.557	1435619_at	2	92.1649	trans	---	Transcribed locus
3.68309	F	rs13478040	4	146.557	1429052_at	4	75.4125	trans	Ptprd	protein tyrosine phosphatase, receptor type, D
3.7616	F	rs13478040	4	146.557	1441440_at	4	98.7179	trans	Atg4c	autophagy-related 4C (yeast)
3.30763	F	rs13478040	4	146.557	1457287_at	6	108.827	trans	---	Transcribed locus
3.36056	F	rs13478040	4	146.557	1453751_at	8	112.448	trans	Dhx38	DEAH (Asp-Glu-Ala-His) box polypeptide 38
3.2504	F	rs13478040	4	146.557	1426303_at	13	55.6097	trans	B4galt7	xylosylprotein beta1,4-galactosyltransferase, polypeptide 7 (galactosyltransferase I)
3.104	F	rs13478040	4	146.557	1417931_at	14	19.5123	trans	Ndst2	N-deacetylase/N-sulfotransferase (heparan glucosaminyl) 2
3.09744	F	rs13478040	4	146.557	1439141_at	14	121.047	trans	Gpr18	G protein-coupled receptor 18
3.25644	F	rs13478040	4	146.557	1449227_at	19	34.5398	trans	Ch25h	cholesterol 25-hydroxylase
3.00178	F	rs13478040	4	146.557	1415964_at	19	44.4478	trans	Scd1	stearoyl-Coenzyme A desaturase 1
9.03462	F	rs13478040	4	146.557	1423393_at	4	134.486	cis	Clic4	chloride intracellular channel 4 (mitochondrial)
6.95419	F	rs13478040	4	146.557	1434315_at	4	134.721	cis	Npal3	NIPA-like domain containing 3
3.34458	F	rs3668420	4	146.784	1439995_at	ambig	ambig	ambig	C80638	expressed sequence C80638
3.38834	F	rs3668420	4	146.784	1456433_at	ambig	ambig	ambig	Rcbtb1	regulator of chromosome condensation (RCC1) and BTB (POZ) domain containing protein 1
16.0645	F	rs3668420	4	146.784	1424784_at	ambig	ambig	ambig	1700029I01Rik /// LOC433791 /// LOC666532 /// LOC671566	RIKEN cDNA 1700029I01 gene /// similar to zinc finger protein 665 /// similar to zinc finger protein 665 /// similar to zinc finger protein 665
3.61755	F	rs3668420	4	146.784	1444524_at	2	128.064	trans	---	Activated spleen cDNA, RIKEN full-length enriched library, clone:F830206P12 product:hypothetical Cytochrome c heme-binding site containing protein, full insert sequence
3.1563	F	rs3668420	4	146.784	1435653_at	7	79.2364	trans	---	Adult male liver tumor cDNA, RIKEN full-length enriched library, clone:C730024P13 product:unclassifiable, full insert sequence
3.21093	F	rs3668420	4	146.784	1460444_at	7	99.4764	trans	Arrb1	arrestin, beta 1
3.00187	F	rs3668420	4	146.784	1436580_at	8	27.4081	trans	---	---
3.25255	F	rs3668420	4	146.784	1417932_at	9	50.3071	trans	Il18	interleukin 18
3.3557	F	rs3668420	4	146.784	1456888_at	9	108.874	trans	Pfkfb4	6-phosphofructo-2-kinase/fructose-2,6-biphosphatase 4
3.54783	F	rs3668420	4	146.784	1426357_at	11	77.3454	trans	Taok1	TAO kinase 1
3.12447	F	rs3668420	4	146.784	1419282_at	11	81.918	trans	Ccl12	chemokine (C-C motif) ligand 12
3.17569	F	rs3668420	4	146.784	1434538_x_at	12	86.1152	trans	Eif2b2	eukaryotic translation initiation factor 2B, subunit 2 beta
3.23879	F	rs3668420	4	146.784	1457034_at	14	26.3081	trans	D14Abb1e	DNA segment, Chr 14, Abbott 1 expressed
3.44519	F	rs3668420	4	146.784	1441561_at	14	101.974	trans	Fbxl3	F-box and leucine-rich repeat protein 3
3.50427	F	rs3668420	4	146.784	1427424_at	15	100.521	trans	Galnt6	UDP-N-acetyl-alpha-D-galactosamine:polypeptide N-acetylgalactosaminyltransferase 6
3.23959	F	rs3668420	4	146.784	1439442_x_at	16	16.2229	trans	Yars2	tyrosyl-tRNA synthetase 2 (mitochondrial)
3.11744	F	rs3668420	4	146.784	1439482_at	17	27.6261	trans	F830021D11Rik	RIKEN cDNA F830021D11 gene
3.06243	F	rs3668420	4	146.784	1415907_at	17	46.9679	trans	Ccnd3	cyclin D3
3.50064	F	rs3668420	4	146.784	1434551_at	19	8.89382	trans	Hnrpul2	heterogeneous nuclear ribonucleoprotein U-like 2
4.09759	F	rs3668420	4	146.784	1418005_at	4	140.233	cis	Sdhb	succinate dehydrogenase complex, subunit B, iron sulfur (Ip)
3.10233	F	rs3668420	4	146.784	1436318_at	4	147.459	cis	Tardbp	TAR DNA binding protein
3.14538	F	c4.loc144	4	147.631	1455061_a_at	ambig	ambig	ambig	Acaa2	acetyl-Coenzyme A acyltransferase 2 (mitochondrial 3-oxoacyl-Coenzyme A thiolase)
8.97137	F	c4.loc144	4	147.631	1439065_x_at	ambig	ambig	ambig	MGC117846	Similar to zinc finger protein 665
9.06755	F	c4.loc144	4	147.631	1436574_at	ambig	ambig	ambig	1700029I01Rik /// LOC666532 /// LOC671566	RIKEN cDNA 1700029I01 gene /// similar to zinc finger protein 665 /// similar to zinc finger protein 665
3.10382	F	c4.loc144	4	147.631	1426923_at	1	82.7185	trans	Hrb	HIV-1 Rev binding protein
3.68968	F	c4.loc144	4	147.631	1418075_at	2	32.4091	trans	St6galnac4	ST6 (alpha-N-acetyl-neuraminyl-2,3-beta-galactosyl-1,3)-N-acetylgalactosaminide alpha-2,6-sialyltransferase 4
3.51582	F	c4.loc144	4	147.631	1418391_at	2	91.9874	trans	Phf21a	PHD finger protein 21A
3.09449	F	c4.loc144	4	147.631	1429415_at	2	165.476	trans	Prkcbp1	protein kinase C binding protein 1
3.19982	F	c4.loc144	4	147.631	1417773_at	4	46.5104	trans	Nans	N-acetylneuraminic acid synthase (sialic acid synthase)
3.6332	F	c4.loc144	4	147.631	1428917_at	4	48.2061	trans	Stx17	syntaxin 17
3.01149	F	c4.loc144	4	147.631	1417324_at	4	115.805	trans	Mast2	microtubule associated serine/threonine kinase 2
3.65208	F	c4.loc144	4	147.631	1427449_a_at	4	125.818	trans	Adprhl2	ADP-ribosylhydrolase like 2
3.74028	F	c4.loc144	4	147.631	1450860_at	5	45.7816	trans	Lap3	leucine aminopeptidase 3
3.08758	F	c4.loc144	4	147.631	1425733_a_at	6	137.443	trans	Eps8	epidermal growth factor receptor pathway substrate 8
3.99247	F	c4.loc144	4	147.631	1434459_at	7	15.5944	trans	BC057627	cDNA sequence BC057627
3.35558	F	c4.loc144	4	147.631	1431255_at	8	75.3532	trans	Calr3	calreticulin 3
3.54695	F	c4.loc144	4	147.631	1419403_at	9	15.256	trans	BC017612	cDNA sequence BC017612
3.28548	F	c4.loc144	4	147.631	1437174_at	9	96.1273	trans	Tfdp2	transcription factor Dp 2
3.11632	F	c4.loc144	4	147.631	1425937_a_at	11	102.933	trans	Hexim1	hexamethylene bis-acetamide inducible 1
3.05359	F	c4.loc144	4	147.631	1454953_at	11	116.152	trans	Rnf157	ring finger protein 157
4.80354	F	c4.loc144	4	147.631	1444337_at	12	84.7546	trans	Numb	Numb gene homolog (Drosophila)
3.43142	F	c4.loc144	4	147.631	1433656_a_at	14	29.8414	trans	Gnl3	guanine nucleotide binding protein-like 3 (nucleolar)
3.11427	F	c4.loc144	4	147.631	1437654_at	14	33.0661	trans	3110001K24Rik	RIKEN cDNA 3110001K24 gene
3.55085	F	c4.loc144	4	147.631	1450722_at	15	84.7509	trans	Nup50	nucleoporin 50
4.16926	F	c4.loc144	4	147.631	1456488_at	18	31.9704	trans	Wdr33	WD repeat domain 33
4.23056	F	c4.loc144	4	147.631	1451803_a_at	19	7.04953	trans	Vegfb	vascular endothelial growth factor B
3.18289	F	c4.loc144	4	147.631	1450970_at	19	43.5532	trans	Got1	glutamate oxaloacetate transaminase 1, soluble
4.89607	F	c4.loc144	4	147.631	1423392_at	4	134.486	cis	Clic4	chloride intracellular channel 4 (mitochondrial)
3.18898	F	c4.loc144	4	147.631	1438766_at	4	135.142	cis	Pnrc2	proline-rich nuclear receptor coactivator 2
3.10182	F	c4.loc146	4	149.631	1456265_at	ambig	ambig	ambig	LOC624866	hypothetical protein LOC624866
4.01137	F	c4.loc146	4	149.631	1416346_at	ambig	ambig	ambig	Timm8a1	translocase of inner mitochondrial membrane 8 homolog a1 (yeast)
33.3788	F	c4.loc146	4	149.631	1437708_x_at	ambig	ambig	ambig	Vamp3	vesicle-associated membrane protein 3
3.4081	F	c4.loc146	4	149.631	1457687_at	1	108.366	trans	Bcl2	B-cell leukemia/lymphoma 2
4.1347	F	c4.loc146	4	149.631	1416975_at	2	52.5137	trans	Stam2	signal transducing adaptor molecule (SH3 domain and ITAM motif) 2
3.46894	F	c4.loc146	4	149.631	1428480_at	4	124.421	trans	Cdca8	cell division cycle associated 8
3.58528	F	c4.loc146	4	149.631	1459840_s_at	4	129.122	trans	Ccdc28b	coiled coil domain containing 28B
3.56582	F	c4.loc146	4	149.631	1428376_at	10	94.1034	trans	4932415G12Rik	RIKEN cDNA 4932415G12 gene
3.05789	F	c4.loc146	4	149.631	1439497_at	12	33.9596	trans	4933415E08Rik	RIKEN cDNA 4933415E08 gene
4.66625	F	c4.loc146	4	149.631	1436235_x_at	13	54.5605	trans	4732471D19Rik	RIKEN cDNA 4732471D19 gene
3.35051	F	c4.loc146	4	149.631	1424850_at	13	112.867	trans	Map3k1 /// LOC670493 /// LOC674573	mitogen activated protein kinase kinase kinase 1 /// similar to Mitogen-activated protein kinase kinase kinase 1 (MAPK/ERK kinase kinase 1) (MEK kinase 1) (MEKK 1) /// similar to Mitogen-activated protein kinase kinase kinase 1 (MAPK/ERK kinase kinase 1) (MEK kinase 1) (MEKK 1)
3.12336	F	c4.loc146	4	149.631	1428337_at	14	54.612	trans	1810034K20Rik	RIKEN cDNA 1810034K20 gene
3.94075	F	c4.loc146	4	149.631	1458148_at	16	3.86023	trans	D230007K08Rik	RIKEN cDNA D230007K08 gene
3.32594	F	c4.loc146	4	149.631	1423358_at	16	20.5251	trans	1810009K13Rik	RIKEN cDNA 1810009K13 gene
4.25458	F	c4.loc146	4	149.631	1415750_at	17	24.428	trans	Tbl3	transducin (beta)-like 3
3.14683	F	c4.loc146	4	149.631	1433853_at	18	10.8136	trans	Mib1	mindbomb homolog 1 (Drosophila)
3.19686	F	c4.loc146	4	149.631	1453752_at	18	75.1266	trans	Rpl17	ribosomal protein L17
4.30482	F	c4.loc146	4	149.631	1434482_at	4	140.385	cis	D4Ertd22e	DNA segment, Chr 4, ERATO Doi 22, expressed
3.03318	F	rs13478054	4	149.729	1456498_at	ambig	ambig	ambig	Itga4	integrin alpha 4
3.04331	F	rs13478054	4	149.729	1455637_x_at	ambig	ambig	ambig	LOC245305	Similar to hypothetical protein FLJ38281
4.88819	F	rs13478054	4	149.729	1417061_at	1	45.8526	trans	Slc40a1	solute carrier family 40 (iron-regulated transporter), member 1
5.36005	F	rs13478054	4	149.729	1448566_at	1	45.8526	trans	Slc40a1	solute carrier family 40 (iron-regulated transporter), member 1
3.6908	F	rs13478054	4	149.729	1434365_a_at	1	165.79	trans	BC055324	cDNA sequence BC055324
3.24572	F	rs13478054	4	149.729	1460726_at	1	179.6	trans	Adss	adenylosuccinate synthetase, non muscle
3.5648	F	rs13478054	4	149.729	1436349_at	2	84.4701	trans	2700094K13Rik	RIKEN cDNA 2700094K13 gene
3.04036	F	rs13478054	4	149.729	1455556_at	3	98.235	trans	Notch2	Notch gene homolog 2 (Drosophila)
3.18028	F	rs13478054	4	149.729	1427250_at	5	122.715	trans	Atp2a2	ATPase, Ca++ transporting, cardiac muscle, slow twitch 2
3.29517	F	rs13478054	4	149.729	1451143_at	7	28.8612	trans	1110006G06Rik	RIKEN cDNA 1110006G06 gene
3.14918	F	rs13478054	4	149.729	1424849_at	7	29.9489	trans	Wdr62	WD repeat domain 62
3.49447	F	rs13478054	4	149.729	1416774_at	7	109.913	trans	Wee1	wee 1 homolog (S. pombe)
3.32224	F	rs13478054	4	149.729	1451540_at	9	57.3424	trans	Mpi1	mannose phosphate isomerase 1
3.05887	F	rs13478054	4	149.729	1459482_at	10	77.3206	trans	Trpm2	transient receptor potential cation channel, subfamily M, member 2
3.06638	F	rs13478054	4	149.729	1452036_a_at	10	90.5774	trans	Tmpo	thymopoietin
3.05854	F	rs13478054	4	149.729	1426453_at	13	6.54741	trans	Pitrm1	pitrilysin metallepetidase 1
3.67771	F	rs13478054	4	149.729	1434532_at	15	100.308	trans	BC035295	cDNA sequence BC035295
3.53499	F	rs13478054	4	149.729	1423333_at	17	26.2891	trans	1200007D18Rik	RIKEN cDNA 1200007D18 gene
3.14047	F	rs13478054	4	149.729	1436200_at	X	32.7976	trans	Lonrf3	LON peptidase N-terminal domain and ring finger 3
3.37363	F	rs13478094	5	4.3169	1417160_s_at	ambig	ambig	ambig	Expi	extracellular proteinase inhibitor
3.634	F	rs13478094	5	4.3169	1450641_at	2	13.4918	trans	Vim	vimentin
4.03038	F	rs13478094	5	4.3169	1460328_at	2	27.2683	trans	Brd3	bromodomain containing 3
3.12279	F	rs13478094	5	4.3169	1426961_at	2	155.888	trans	Phf20	PHD finger protein 20
4.10607	F	rs13478094	5	4.3169	1455217_at	3	104.583	trans	Lrig2	leucine-rich repeats and immunoglobulin-like domains 2
3.64706	F	rs13478094	5	4.3169	1460614_at	13	112.836	trans	Mier3	mesoderm induction early response 1, family member 3
3.04709	F	rs13478094	5	4.3169	1419249_at	5	4.80939	cis	Pftk1	PFTAIRE protein kinase 1
6.2863	F	rs13478094	5	4.3169	1419250_a_at	5	4.80939	cis	Pftk1	PFTAIRE protein kinase 1
3.23886	F	c5.loc2	5	6.3169	1428081_at	4	150.859	trans	Klhl21	kelch-like 21 (Drosophila)
3.10896	F	c5.loc2	5	6.3169	1416227_at	5	145.368	trans	Arpc1b /// LOC434782 /// LOC671552	actin related protein 2/3 complex, subunit 1B /// similar to Actin-related protein 2/3 complex subunit 1B (ARP2/3 complex 41 kDa subunit) (p41-ARC) /// similar to Actin-related protein 2/3 complex subunit 1B (ARP2/3 complex 41 kDa subunit) (p41-ARC)
[truncated: 7,310 more rows]
