# Supplementary material for: Sex Specific Gene Regulation and Expression QTLs in Mouse Macrophages from a Strain Intercross
Source: PLoS One. 2008 Jan 16;3(1):e1435. doi: 10.1371/journal.pone.0001435 (PMC2174529; doi:10.1371/journal.pone.0001435)
Supplement: Table S4 — (0.34 MB XLS) [file pone.0001435.s004.xls]

## Sheet: shared CIS eQTLs
Supplemental Table S4. Sex-shared cis eQTLS sorted by genomic location.
shared probe	probe chr	probe Mb	marker chr	F eQTL Mb	M eQTL Mb	F lod	M lod	Gene Symbol	Description
1425189_a_at	1	4.76329	1	9.1483	4.7872	7.81858	10.8046	Mrpl15	mitochondrial ribosomal protein L15
1434971_x_at	1	4.76646	1	3.7612	4.7872	8.727	10.7048	---	---
1430798_x_at	1	4.77132	1	5.1515	4.7872	25.4078	37.2969	Mrpl15	mitochondrial ribosomal protein L15
1419258_at	1	4.84778	1	5.1515	3.7612	19.4596	15.819	Tcea1	transcription elongation factor A (SII) 1
1419257_at	1	4.84778	1	4.7872	3.7612	12.2523	22.3228	Tcea1	transcription elongation factor A (SII) 1
1436793_at	1	6.81785	1	10.1047	6.4942	14.1595	23.3182	St18	suppression of tumorigenicity 18
1456607_at	1	9.70514	1	5.1515	15.3707	6.61169	4.80174	Vcpip1	valosin containing protein (p97)/p47 complex interacting protein 1
1435234_at	1	13.1243	1	12.8349	19.7888	3.69664	9.03317	Ncoa2	nuclear receptor coactivator 2
1423732_at	1	13.5499	1	17.7612	3.7612	5.65015	4.0029	Tram1	translocating chain-associating membrane protein 1
1418380_at	1	15.7909	1	25.0772	17.3259	6.87095	6.7435	Terf1	telomeric repeat binding factor 1
1424412_at	1	23.3207	1	25.0772	25.0772	21.8531	8.97362	Ogfrl1	opioid growth factor receptor-like 1
1424413_at	1	23.3207	1	25.0772	25.0772	10.8446	23.3587	Ogfrl1	opioid growth factor receptor-like 1
1453122_at	1	23.965	1	25.0772	25.0772	17.2906	19.0911	4921533L14Rik	RIKEN cDNA 4921533L14 gene
1425186_at	1	24.6329	1	42.5969	31.6335	4.87647	6.44189	Lmbrd1	LMBR1 domain containing 1
1417293_at	1	36.0125	1	42.5969	48.5948	9.44199	6.35882	Hs6st1	heparan sulfate 6-O-sulfotransferase 1
1444003_at	1	36.2135	1	39.9876	31.6335	4.46571	9.06016	Lincr	lung-inducible neuralized-related C3HC4 RING domain protein
1421360_at	1	37.2445	1	39.9876	40.3522	3.52332	24.0638	Inpp4a	inositol polyphosphate-4-phosphatase, type I
1426620_at	1	38.8084	1	44.9905	41.2743	7.58395	5.1257	Chst10	carbohydrate sulfotransferase 10
1424002_at	1	38.9324	1	39.9876	38.0386	4.93706	8.79606	Pdcl3	phosducin-like 3
1418034_at	1	42.7958	1	60.9123	42.5969	9.9387	5.76439	Mrps9	mitochondrial ribosomal protein S9
1448921_a_at	1	42.7958	1	45.7612	41.6268	8.01889	7.75992	Mrps9	mitochondrial ribosomal protein S9
1428425_at	1	42.9918	1	40.9688	48.5948	4.90092	7.5977	Tgfbrap1	transforming growth factor, beta receptor associated protein 1
1416796_at	1	43.3904	1	44.9905	43.1545	8.15977	10.9573	Nck2	non-catalytic region of tyrosine kinase adaptor protein 2
1451512_s_at	1	52.7896	1	53.7612	58.3585	7.69687	10.0859	Hibch	3-hydroxyisobutyryl-Coenzyme A hydrolase
1423452_at	1	53.7001	1	59.7612	55.751	4.12606	5.12568	Stk17b	serine/threonine kinase 17b (apoptosis-inducing)
1454765_at	1	54.3415	1	51.8795	43.1545	4.5109	3.65942	Gtf3c3	general transcription factor IIIC, polypeptide 3
1434422_at	1	57.3291	1	55.7612	58.3585	9.03324	8.18116	---	---
1416931_at	1	58.3897	1	59.7612	52.9783	6.49177	8.4326	Nif3l1	Ngg1 interacting factor 3-like 1 (S. pombe)
1418225_at	1	58.4073	1	76.8402	69.1558	8.64258	8.66383	Orc2l	origin recognition complex, subunit 2-like (S. cerevisiae)
1456257_at	1	58.4692	1	76.8402	62.9869	9.91442	9.40681	C130065N10Rik	RIKEN cDNA C130065N10 gene
1436229_at	1	58.4707	1	76.8402	73.9888	4.07976	3.52969	BC049806	CDNA sequence BC049806
1456320_at	1	58.4719	1	76.8402	73.1975	7.60501	6.65895	BC049806	cDNA sequence BC049806
1435661_at	1	59.0451	1	59.7612	62.2441	25.0021	16.7991	Als2cr4	amyotrophic lateral sclerosis 2 (juvenile) chromosome region, candidate 4
1436984_at	1	60.4229	1	62.2441	58.3585	6.55573	14.0128	Abi2	abl-interactor 2
1433985_at	1	60.4243	1	62.2441	52.9783	8.97812	16.8373	Abi2	abl-interactor 2
1434303_at	1	60.4279	1	59.7612	48.5948	16.9468	9.90061	Raph1	Ras association (RalGDS/AF-6) and pleckstrin homology domains 1
1437917_at	1	64.0484	1	59.7612	58.3585	6.22816	8.4621	D530037H12Rik	RIKEN cDNA D530037H12 gene
1449274_at	1	64.5407	1	65.7612	74.5616	9.96081	17.572	2310038H17Rik	RIKEN cDNA 2310038H17 gene
1422994_at	1	65.121	1	69.1558	69.1558	9.36148	26.7755	Pip5k3	phosphatidylinositol-3-phosphate/phosphatidylinositol 5-kinase, type III
1452994_at	1	65.2097	1	67.7612	58.3585	33.2256	30.8845	Pip5k3	phosphatidylinositol-3-phosphate/phosphatidylinositol 5-kinase, type III
1428506_at	1	71.4904	1	76.8402	73.9888	5.50642	4.91316	Atic	5-aminoimidazole-4-carboxamide ribonucleotide formyltransferase/IMP cyclohydrolase
1435980_x_at	1	74.7179	1	76.8402	76.8402	8.15568	8.57538	Wnt6	wingless-related MMTV integration site 6
1448657_a_at	1	75.1197	1	85.4265	80.1627	6.3079	21.7414	Dnajb10	DnaJ (Hsp40) homolog, subfamily B, member 10
1416127_a_at	1	75.1917	1	76.8402	94.0599	3.4817	3.29772	Dnpep	aspartyl aminopeptidase
1417578_a_at	1	75.3191	1	73.5229	73.9888	4.63516	5.28305	Gmppa	GDP-mannose pyrophosphorylase A
1431792_a_at	1	75.4047	1	67.7612	79.0291	7.2332	9.91402	Stk11ip	serine/threonine kinase 11 interacting protein
1429021_at	1	77.2502	1	94.6584	80.4701	8.82149	8.09657	Epha4	Eph receptor A4
1421929_at	1	77.2523	1	80.4701	93.2403	4.41372	8.86662	Epha4	Eph receptor A4
1430986_at	1	78.3011	1	80.4701	79.0291	4.41827	4.30679	Farslb	phenylalanine-tRNA synthetase-like, beta subunit
1456635_at	1	84.9904	1	89.3946	79.0291	19.2845	15.9482	---	---
1422141_s_at	1	85.0812	1	89.7612	85.4265	12.1216	17.9952	Csprs	component of Sp100-rs
1422140_at	1	85.0812	1	89.3946	85.4265	19.2375	18.9694	Sp100-rs /// LOC620113 /// LOC665338 /// LOC665378 /// LOC673083 /// LOC673135 /// LOC673206 /// LOC673671 /// LOC673849 /// LOC673997	similar to component of Sp100-rs /// similar to component of Sp100-rs /// similar to component of Sp100-rs /// similar to component of Sp100-rs /// similar to component of Sp100-rs /// similar to component of Sp100-rs /// similar to component of Sp100-rs /// similar to component of Sp100-rs /// similar to component of Sp100-rs /// similar to component of Sp100-rs
1460416_s_at	1	87.2645	1	89.3946	85.4265	10.8794	19.7906	Csprs /// Sp100-rs /// LOC665338 /// LOC665378 /// LOC673105 /// LOC673206 /// LOC673671 /// LOC673849 /// LOC673925 /// LOC673997	component of Sp100-rs /// similar to component of Sp100-rs /// similar to component of Sp100-rs /// similar to component of Sp100-rs /// similar to component of Sp100-rs /// similar to component of Sp100-rs /// similar to component of Sp100-rs /// similar to component of Sp100-rs /// similar to component of Sp100-rs /// similar to component of Sp100-rs
1440214_at	1	87.5483	1	89.3946	85.4265	18.6514	24.4422	A630001G21Rik	RIKEN cDNA A630001G21 gene
1428169_at	1	89.5872	1	95.0244	94.0599	3.80411	3.56468	Atg16l1	autophagy-related 16-like 1 (yeast)
1422178_a_at	1	92.7885	1	91.4212	91.9491	10.7649	9.76265	Rab17	RAB17, member RAS oncogene family
1417671_at	1	93.1288	1	73.5229	78.8875	5.85454	4.30956	Scly	selenocysteine lyase
1436758_at	1	93.7623	1	89.7612	107.208	4.03703	3.59166	Hdac4	histone deacetylase 4
1447754_x_at	1	95.5358	1	96.3378	96.3378	13.0652	10.8619	Thap4	THAP domain containing 4
1435262_at	1	107.346	1	109.207	108.665	22.2658	18.8856	---	Transcribed locus
1421284_at	1	107.349	1	91.4212	105.862	7.62171	22.2175	Pign	phosphatidylinositol glycan anchor biosynthesis, class N
1432115_a_at	1	107.474	1	123.761	104.543	6.85686	13.4861	Pign	phosphatidylinositol glycan anchor biosynthesis, class N
1441293_at	1	107.815	1	109.207	108.665	17.0679	26.6549	---	Adult male accessory axillary lymph node cDNA, RIKEN full-length enriched library, clone:G630004G16 product:unclassifiable, full insert sequence
1458882_at	1	109.435	1	103.616	109.367	6.53973	3.58504	Serpinb8	serine (or cysteine) peptdiase inhibitor, clade B, member 8
1448516_at	1	120.126	1	121.761	119.099	9.09977	12.6971	Tsn	translin
1435772_at	1	137.991	1	140.469	131.655	8.10035	9.62133	Kif21b	kinesin family member 21B
1460333_at	1	138.232	1	140.101	139.04	8.27057	14.7042	Ddx59	DEAD (Asp-Glu-Ala-Asp) box polypeptide 59
1434471_at	1	152.124	1	154.191	153.282	31.5182	27.6981	BC003331	cDNA sequence BC003331
1426089_a_at	1	152.125	1	151.761	153.282	40.9571	30.4448	BC003331	cDNA sequence BC003331
1456112_at	1	152.155	1	154.191	147.278	11.1381	7.84989	Tpr	translocated promoter region
1426948_at	1	152.186	1	155.761	142.489	10.2185	15.159	Tpr	translocated promoter region
1424873_at	1	153.232	1	154.191	147.278	11.1973	10.916	Rnf2	ring finger protein 2
1418535_at	1	154.28	1	158.897	147.278	8.98677	12.0292	Rgl1	ral guanine nucleotide dissociation stimulator,-like 1
1448561_at	1	154.57	1	155.761	153.282	25.4181	30.4835	Ncf2	neutrophil cytosolic factor 2
1423885_at	1	154.981	1	153.282	147.278	3.40697	5.24007	Lamc1	laminin, gamma 1
1444177_at	1	155.176	1	155.761	153.282	21.7309	24.394	---	PREDICTED: Mus musculus hypothetical protein LOC626058 (LOC626058), mRNA
1424265_at	1	155.265	1	158.193	158.193	26.623	37.3525	Npl	N-acetylneuraminate pyruvate lyase
1426603_at	1	155.514	1	158.193	158.193	6.90636	15.4896	Rnasel	ribonuclease L (2', 5'-oligoisoadenylate synthetase-dependent)
1426236_a_at	1	155.662	1	154.191	172.425	6.78398	6.58855	Glul	glutamate-ammonia ligase (glutamine synthetase)
1460009_at	1	156.859	1	158.193	158.897	30.5047	28.4058	---	Transcribed locus
1417612_at	1	156.859	1	153.282	154.191	5.89857	6.46305	Ier5	immediate early response 5
1421899_a_at	1	156.89	1	147.278	147.278	4.81194	3.19102	Mr1	major histocompatibility complex, class I-related
1421898_a_at	1	156.89	1	147.278	146.633	6.18735	6.47888	Mr1	major histocompatibility complex, class I-related
1434362_at	1	158.261	1	162.552	154.191	12.0269	15.9803	AW550831	expressed sequence AW550831
1448068_at	1	158.264	1	168.774	161.849	14.972	20.3098	Soat1	sterol O-acyltransferase 1
1428789_at	1	158.641	1	158.897	154.191	25.1149	13.4867	Ralgps2	Ral GEF with PH domain and SH3 binding motif 2
1431704_a_at	1	158.65	1	161.849	154.191	7.06648	13.783	Ralgps2	Ral GEF with PH domain and SH3 binding motif 2
1460696_at	1	159.295	1	154.191	172.425	11.3072	6.36658	BC026585	cDNA sequence BC026585
1426912_at	1	161.069	1	177.761	162.332	3.81601	8.95319	Rfwd2 /// LOC621205	ring finger and WD repeat domain 2 /// similar to constitutive photomorphogenic protein 1
1437900_at	1	161.912	1	163.298	166.152	9.11817	5.91148	4930523C07Rik	RIKEN cDNA 4930523C07 gene
1452047_at	1	162.04	1	166.943	173.058	6.21273	3.68716	Cacybp	calcyclin binding protein
1434062_at	1	162.056	1	172.425	162.332	10.1536	9.15825	Rabgap1l	RAB GTPase activating protein 1-like
1434933_at	1	162.809	1	167.947	165.35	29.7193	27.7708	5730557L09Rik	RIKEN cDNA 5730557L09 gene
1419291_x_at	1	162.872	1	176.738	167.947	4.27038	4.86467	Gas5	growth arrest specific 5
1449410_a_at	1	162.872	1	176.738	165.35	6.36072	5.76416	Gas5	growth arrest specific 5
1424843_a_at	1	162.872	1	167.947	165.35	14.2105	15.8906	Gas5	growth arrest specific 5
1438663_at	1	164.508	1	163.761	162.332	16.6524	11.2115	Bat2d	BAT2 domain containing 1
1458365_at	1	165.223	1	168.774	169.508	9.52308	8.09908	Scyl1bp1	SCY1-like 1 binding protein 1
1451783_a_at	1	165.616	1	167.947	165.35	3.09021	3.89043	Kifap3	kinesin-associated protein 3
1452960_at	1	165.766	1	166.152	162.332	7.73116	4.11476	Scyl3	SCY1-like 3 (S. cerevisiae)
1428918_at	1	165.766	1	166.943	166.943	8.29582	8.02282	Scyl3	SCY1-like 3 (S. cerevisiae)
1434365_a_at	1	165.79	1	167.947	173.058	6.80128	10.6569	BC055324	cDNA sequence BC055324
1437186_at	1	165.791	1	167.947	169.376	15.2203	10.2003	BC055324	cDNA sequence BC055324
1417902_at	1	166.086	1	170.422	173.058	10.139	7.23683	Slc19a2	solute carrier family 19 (thiamine transporter), member 2
1451152_a_at	1	166.274	1	147.278	158.193	3.23038	4.058	Atp1b1	ATPase, Na+/K+ transporting, beta 1 polypeptide
1435141_at	1	167.011	1	171.268	171.268	8.02224	3.97924	Sft2d2	SFT2 domain containing 2
1435142_at	1	167.011	1	173.058	185.029	4.7078	5.4223	Sft2d2	SFT2 domain containing 2
1453312_at	1	167.166	1	173.761	165.35	10.4842	3.61311	Iqwd1	IQ motif and WD repeats 1
1423833_a_at	1	167.298	1	170.422	167.662	15.9392	12.5262	Brp44	brain protein 44
1428168_at	1	167.429	1	178.648	173.058	8.47297	7.4666	Mpzl1	myelin protein zero-like 1
1428167_a_at	1	167.429	1	175.761	173.058	5.24775	7.98119	Mpzl1	myelin protein zero-like 1
1415948_at	1	167.6	1	173.058	167.947	4.19521	6.58727	Creg1	cellular repressor of E1A-stimulated genes 1
1419716_a_at	1	167.712	1	170.422	167.947	15.6398	7.81553	Pou2f1	POU domain, class 2, transcription factor 1
1427695_a_at	1	167.717	1	171.268	165.35	5.62676	6.13895	Pou2f1	POU domain, class 2, transcription factor 1
1424427_at	1	168.216	1	172.425	166.943	3.20881	9.73011	Tada1l	transcriptional adaptor 1 (HFI1 homolog, yeast) like
1448604_at	1	169.061	1	171.761	167.947	8.63723	13.902	Uck2	uridine-cytidine kinase 2
1425383_a_at	1	169.995	1	166.943	154.191	4.30823	7.50786	Pbx1 /// LOC676870	pre B-cell leukemia transcription factor 1 /// region containing RIKEN cDNA 2310056B04 gene; pre B-cell leukemia transcription factor 1
1452913_at	1	173.01	1	171.268	178.648	5.78863	4.41951	Pcp4l1	Purkinje cell protein 4-like 1
1429382_at	1	173.056	1	176.738	176.738	9.86107	18.2427	Tomm40l	translocase of outer mitochondrial membrane 40 homolog-like (yeast)
1451096_at	1	173.072	1	178.303	176.738	5.60061	4.7303	Ndufs2	NADH dehydrogenase (ubiquinone) Fe-S protein 2
1416618_at	1	173.114	1	178.648	173.058	4.67209	5.45691	Ppox	protoporphyrinogen oxidase
1417469_at	1	173.177	1	176.738	176.738	4.14092	3.82837	Nit1	nitrilase 1
1417468_at	1	173.177	1	173.058	183.444	3.85568	7.38947	Nit1	nitrilase 1
1436171_at	1	173.245	1	176.738	185.029	8.82207	10.833	Arhgap30	Rho GTPase activating protein 30
1431203_at	1	178.652	1	176.738	176.738	3.58324	4.03825	Sdccag8	serologically defined colon cancer antigen 8
1456538_at	1	178.785	1	178.648	162.332	5.10923	3.94369	Sdccag8	serologically defined colon cancer antigen 8
1417010_at	1	179.282	1	187.449	176.738	11.8339	11.2249	Zfp238	zinc finger protein 238
1460726_at	1	179.6	1	183.444	178.648	5.81206	6.43172	Adss	adenylosuccinate synthetase, non muscle
1425185_at	1	180.024	1	187.761	182.29	3.59326	3.26567	5830417C01Rik	RIKEN cDNA 5830417C01 gene
1420513_at	1	180.243	1	182.356	182.29	3.61022	6.97737	Efcab2	EF-hand calcium binding domain 2
1452817_at	1	180.793	1	182.29	176.738	5.75376	4.70595	Smyd3	SET and MYND domain containing 3
1423441_at	1	181.365	1	183.444	182.29	29.4653	10.3047	Tfb2m	transcription factor B2, mitochondrial
1436795_at	1	181.447	1	183.761	178.648	3.45642	8.35149	9630058J23Rik	RIKEN cDNA 9630058J23 gene
1426510_at	1	181.505	1	182.29	184.698	19.9763	28.0178	Sccpdh	saccharopine dehydrogenase (putative)
1423871_at	1	182.783	1	184.698	185.029	15.2119	19.9549	Tmem63a	transmembrane protein 63a
1429763_at	1	182.988	1	185.029	185.029	7.33983	4.31761	Cnih4	cornichon homolog 4 (Drosophila)
1426735_at	1	186.986	1	187.449	190.827	6.5589	9.64656	Iars2	isoleucine-tRNA synthetase 2, mitochondrial
1426713_s_at	1	187.064	1	189.761	189.529	11.1467	17.0539	Eprs /// LOC633677	glutamyl-prolyl-tRNA synthetase /// similar to Bifunctional aminoacyl-tRNA synthetase
1438082_at	1	193.053	1	195.232	195.02	17.8065	15.8845	2310028N02Rik	RIKEN cDNA 2310028N02 gene
1428531_at	1	193.305	1	196.922	197.048	5.18986	7.49288	Ints7	integrator complex subunit 7
1457027_at	2	5.81337	2	7.3134	3.0473	4.79683	10.464	Dhtkd1	dehydrogenase E1 and transketolase domain containing 1
1455580_at	2	6.35914	2	3.0473	5.765	9.59375	10.9391	Usp6nl	USP6 N-terminal like
1445161_at	2	6.36108	2	7.0473	3.0473	4.70627	9.40663	---	---
1440883_at	2	6.36231	2	3.0473	5.765	5.67854	5.16828	---	Transcribed locus
1457449_at	2	68.7503	2	62.1895	53.262	7.25617	3.30393	Lass6	Longevity assurance homolog 6 (S. cerevisiae)
1433831_at	2	70.8853	2	65.0427	72.4246	27.2051	28.2098	4833418A01Rik	RIKEN cDNA 4833418A01 gene
1452464_a_at	2	71.2542	2	77.8736	71.79	13.6714	15.4471	Metapl1	methionine aminopeptidase-like 1
1423672_at	2	75.7366	2	77.6106	77.6106	13.9101	26.5187	2510042P03Rik	RIKEN cDNA 2510042P03 gene
1437904_at	2	76.1799	2	75.0473	76.3038	42.3122	52.048	Drbp1	developmentally regulated RNA binding protein 1
1451790_a_at	2	84.2337	2	83.0473	92.111	20.0898	27.3699	Tfpi	tissue factor pathway inhibitor
1451791_at	2	84.2337	2	83.0473	92.111	22.7254	32.1649	Tfpi	tissue factor pathway inhibitor
1438530_at	2	84.2413	2	81.0473	92.111	32.7738	46.4393	Tfpi	tissue factor pathway inhibitor
1452432_at	2	84.2426	2	81.0473	92.111	38.6488	46.518	Tfpi	tissue factor pathway inhibitor
1418747_at	2	90.8969	2	92.111	98.3447	6.02801	9.15499	Sfpi1	SFFV proviral integration 1
1419295_at	2	91.7832	2	92.9896	92.9896	3.07393	3.82017	Creb3l1	cAMP responsive element binding protein 3-like 1
1452139_at	2	92.2536	2	92.9896	94.6836	23.1761	18.8262	Slc35c1	solute carrier family 35, member C1
1449147_at	2	92.4007	2	98.2862	94.6836	6.46991	10.3978	Chst1	carbohydrate (keratan sulfate Gal-6) sulfotransferase 1
1423760_at	2	102.613	2	108.12	103.147	15.518	3.71317	Cd44	CD44 antigen
1416430_at	2	103.255	2	103.147	103.147	10.0217	14.9229	Cat	catalase
1423211_at	2	112.063	2	125.385	118.179	3.573	4.12388	Nola3	nucleolar protein family A, member 3
1438434_at	2	113.632	2	117.047	115.613	7.69966	11.8597	Arhgap11a	Rho GTPase activating protein 11A
1433497_at	2	113.793	2	120.023	115.019	25.0549	35.5674	Aqr	aquarius
1418568_x_at	2	118.167	2	125.762	120.765	3.13032	3.28727	Srp14	signal recognition particle 14
1445191_at	2	119.211	2	135.282	120.765	4.07221	6.06929	Exdl1	Vexonuclease 3'-5' domain-like 1
1420810_at	2	119.239	2	115.231	130.355	4.49949	8.28323	1500003O03Rik	RIKEN cDNA 1500003O03 gene
1423711_at	2	119.347	2	123.047	122.052	17.9108	34.3837	Ndufaf1	NADH dehydrogenase (ubiquinone) 1 alpha subcomplex, assembly factor 1
1428312_at	2	120.296	2	123.047	116.473	8.58543	5.97087	Lrrc57	leucine rich repeat containing 57
1430057_s_at	2	120.296	2	120.765	118.179	10.6001	14.0991	Lrrc57	leucine rich repeat containing 57
1430577_at	2	120.301	2	115.231	122.052	7.9207	13.27	Cep27	centrosomal protein 27
1454112_a_at	2	120.301	2	123.047	127.355	7.80854	22.7459	Cep27	centrosomal protein 27
1430304_at	2	121.198	2	128.4	118.179	3.02942	7.95193	Wdr76	WD repeat domain 76
1426584_a_at	2	121.926	2	123.91	116.473	13.8047	8.13687	Sord	sorbitol dehydrogenase
1448406_at	2	125.358	2	125.047	132.74	6.1723	5.66838	Cri1	CREBBP/EP300 inhibitory protein 1
1416800_at	2	126.483	2	113.131	131.206	6.84592	14.4797	Trpm7	transient receptor potential cation channel, subfamily M, member 7
1452225_at	2	126.582	2	127.395	127.355	7.85499	4.03179	2010106G01Rik	RIKEN cDNA 2010106G01 gene
1425193_at	2	126.583	2	115.231	127.355	11.9165	5.3363	2010106G01Rik	RIKEN cDNA 2010106G01 gene
1431234_at	2	126.832	2	128.213	116.473	4.21858	7.96464	1700041B20Rik	RIKEN cDNA 1700041B20 gene
1454772_at	2	126.918	2	120.765	136.28	7.85628	10.2305	Ascc3l1	activating signal cointegrator 1 complex subunit 3-like 1
1431190_x_at	2	127.128	2	113.131	123.91	3.83759	6.2489	Fahd2a	fumarylacetoacetate hydrolase domain containing 2A
1431002_x_at	2	127.128	2	127.395	127.395	7.09957	11.753	Fahd2a	fumarylacetoacetate hydrolase domain containing 2A
1453795_at	2	127.128	2	128.4	120.765	4.18705	12.2301	Fahd2a	fumarylacetoacetate hydrolase domain containing 2A
1431189_a_at	2	127.128	2	135.282	127.355	4.84543	13.6454	Fahd2a	fumarylacetoacetate hydrolase domain containing 2A
1448488_at	2	127.279	2	130.355	127.395	7.84951	20.3403	Mrps5	mitochondrial ribosomal protein S5
1453954_a_at	2	127.279	2	125.762	125.385	4.39466	6.56276	Mrps5	mitochondrial ribosomal protein S5
1426334_a_at	2	127.819	2	134.004	131.206	6.41264	17.8258	Bcl2l11	BCL2-like 11 (apoptosis facilitator)
1435449_at	2	127.851	2	127.395	130.355	8.04387	9.10797	Bcl2l11	BCL2-like 11 (apoptosis facilitator)
1456005_a_at	2	127.852	2	130.355	130.355	15.9347	15.5726	Bcl2l11	BCL2-like 11 (apoptosis facilitator)
1456006_at	2	127.852	2	128.4	130.355	18.0966	15.7012	Bcl2l11	BCL2-like 11 (apoptosis facilitator)
1444524_at	2	128.064	2	130.355	120.765	5.68196	3.80115	---	Activated spleen cDNA, RIKEN full-length enriched library, clone:F830206P12 product:hypothetical Cytochrome c heme-binding site containing protein, full insert sequence
1434443_at	2	128.302	2	128.4	132.74	3.6292	3.60655	---	---
1434444_s_at	2	128.302	2	130.355	118.533	9.85251	8.90198	---	---
1422869_at	2	128.39	2	130.355	130.355	14.0426	30.9744	Mertk	c-mer proto-oncogene tyrosine kinase
1418495_at	2	128.618	2	136.57	130.355	6.13419	12.5522	Zc3h8	zinc finger CCCH type containing 8
1438824_at	2	128.892	2	134.004	130.355	14.3886	20.6248	Slc20a1	solute carrier family 20, member 1
1439802_at	2	129.522	2	130.355	130.355	13.364	10.4771	Stk35	serine/threonine kinase 35
1422161_at	2	130.76	2	130.355	125.385	4.73637	6.93744	Siglec1	sialic acid binding Ig-like lectin 1, sialoadhesin
1427668_at	2	130.764	2	131.047	116.473	7.55752	12.5351	Siglec1	sialic acid binding Ig-like lectin 1, sialoadhesin
1431948_a_at	2	130.954	2	134.004	132.74	8.01301	21.4081	Pank2	pantothenate kinase 2 (Hallervorden-Spatz syndrome)
1424268_at	2	131.183	2	135.282	135.786	5.28319	9.93211	Smox	spermine oxidase
1434942_at	2	139.811	2	140.031	142.512	7.3726	4.57049	2610101J03Rik	RIKEN cDNA 2610101J03 gene
1458694_at	2	142.309	2	145.047	142.512	7.15022	18.9583	AI789011	expressed sequence AI789011
1426613_a_at	2	142.754	2	147.047	141.235	10.0682	9.38358	Snrpb2	U2 small nuclear ribonucleoprotein B
1452131_at	2	142.754	2	147.979	144.195	13.6787	18.5559	---	---
1452422_a_at	2	142.755	2	143.667	141.235	8.09513	7.54959	Snrpb2	U2 small nuclear ribonucleoprotein B
1417124_at	2	143.607	2	142.512	139.214	24.2067	38.5925	Dstn	destrin
1417646_a_at	2	143.942	2	143.667	139.214	4.99891	6.2716	Snx5	sorting nexin 5
1417648_s_at	2	143.942	2	143.667	144.195	8.93978	15.7374	Snx5	sorting nexin 5
1437074_at	2	143.959	2	143.667	144.195	8.20826	9.82623	Snx5	sorting nexin 5
1416059_at	2	144.248	2	142.512	144.195	3.61832	5.01014	Sec23b	SEC23B (S. cerevisiae)
1451040_at	2	144.291	2	149.047	158.963	3.99736	6.00258	Hars2	histidyl tRNA synthetase 2
1433028_at	2	148.12	2	142.512	139.214	5.46889	6.22036	4833411I10Rik	RIKEN cDNA 4833411I10 gene
1419589_at	2	148.128	2	149.546	153.774	3.49977	11.8465	Cd93	CD93 antigen
1456046_at	2	148.129	2	147.979	153.774	5.20375	9.25108	Cd93	CD93 antigen
1441907_s_at	2	148.132	2	149.546	158.963	4.15256	3.57965	Cd93	CD93 antigen
1428309_s_at	2	152.7	2	149.546	153.774	4.77767	11.9033	Pdrg1	p53 and DNA damage regulated 1
1428308_at	2	152.7	2	149.546	153.774	5.5765	18.3404	Pdrg1	p53 and DNA damage regulated 1
1423204_at	2	152.894	2	147.979	148.928	4.14847	7.22267	Tm9sf4	transmembrane 9 superfamily protein member 4
1423205_at	2	152.894	2	147.979	149.546	26.5646	28.4046	Tm9sf4	transmembrane 9 superfamily protein member 4
1420987_at	2	152.983	2	153.774	158.963	9.76393	4.57857	Kif3b	kinesin family member 3B
1450073_at	2	152.983	2	148.928	148.928	6.41653	12.1411	Kif3b	kinesin family member 3B
1428284_at	2	153.099	2	153.774	153.774	8.62123	3.33695	8430427H17Rik	RIKEN cDNA 8430427H17 gene
1428285_at	2	153.099	2	153.774	149.87	13.0299	6.8983	8430427H17Rik	RIKEN cDNA 8430427H17 gene
1456264_at	2	153.308	2	153.774	158.963	6.87535	12.8933	Commd7 /// LOC631742 /// LOC674161	COMM domain containing 7 /// similar to COMM domain containing protein 7 /// similar to COMM domain-containing protein 7
1426765_at	2	153.31	2	153.774	148.09	12.2597	11.7296	Commd7 /// LOC631742 /// LOC674161	COMM domain containing 7 /// similar to COMM domain containing protein 7 /// similar to COMM domain-containing protein 7
1422764_at	2	153.433	2	147.979	148.09	5.40816	5.22474	Mapre1	microtubule-associated protein, RP/EB family, member 1
1450740_a_at	2	153.433	2	153.774	147.979	24.9696	29.774	Mapre1	microtubule-associated protein, RP/EB family, member 1
1428820_at	2	153.461	2	153.774	144.195	17.6693	12.9191	Mapre1	microtubule-associated protein, RP/EB family, member 1
1448550_at	2	157.998	2	157.047	158.963	15.6307	10.3993	Lbp	lipopolysaccharide binding protein
1448793_a_at	2	164.115	2	166.01	162.685	20.8757	16.7105	Sdc4	syndecan 4
1450057_at	2	164.148	2	166.01	163.272	13.8042	15.6438	2610042O14Rik	RIKEN cDNA 2610042O14 gene
1447382_at	2	164.194	2	167.047	166.01	13.7921	14.446	Pigt	phosphatidylinositol glycan anchor biosynthesis, class T
1448597_at	2	172.062	2	178.749	173.7	7.14679	4.11782	Cstf1	cleavage stimulation factor, 3' pre-RNA, subunit 1
1422512_a_at	2	180.519	2	179.019	178.749	3.10638	5.4016	Ogfr	opioid growth factor receptor
1422511_a_at	2	180.519	2	179.385	179.019	6.67167	6.39388	Ogfr	opioid growth factor receptor
1451735_at	2	181.288	2	179.385	178.749	23.1809	24.2548	Arfrp1	ADP-ribosylation factor related protein 1
1417848_at	3	9.41008	3	10.3188	7.5163	5.65175	10.9863	Zfp704	zinc finger protein 704
1434493_at	3	14.583	3	12.6796	10.3188	14.5876	16.6627	1810022K09Rik	RIKEN cDNA 1810022K09 gene
1448752_at	3	14.8631	3	14.8192	19.5793	6.03441	3.79682	Car2	carbonic anhydrase 2
1458683_at	3	16.0234	3	12.681	15.5803	9.16745	8.20728	Sirpb1 /// LOC673172	signal-regulatory protein beta 1 /// similar to SIRP beta 1 isoform 1
1415719_s_at	3	19.3243	3	19.0647	15.5803	8.12207	7.79635	Armc1	armadillo repeat containing 1
1417227_at	3	36.1509	3	37.5163	36.7375	23.0119	14.999	Mccc1	methylcrotonoyl-Coenzyme A carboxylase 1 (alpha)
1429581_at	3	36.2576	3	36.7375	27.9573	9.72347	11.3084	Acad9	acyl-Coenzyme A dehydrogenase family, member 9
1425567_a_at	3	36.6405	3	43.6051	37.2593	5.90074	5.89351	Anxa5	annexin A5
1426753_at	3	41.71	3	45.5163	43.6051	11.6686	10.3244	Phf17	PHD finger protein 17
1424875_at	3	55.2001	3	68.0279	53.9118	3.75258	6.82149	Spg20	spastic paraplegia 20, spartin (Troyer syndrome) homolog (human)
1418210_at	3	57.9298	3	45.5163	43.3095	3.07563	4.50755	Pfn2	profilin 2
1418209_a_at	3	57.9298	3	47.5163	43.3095	3.15646	5.35379	Pfn2	profilin 2
1448885_at	3	61.4525	3	57.5163	63.026	12.6009	15.7134	Rap2b	RAP2B, member of RAS oncogene family
1452160_at	3	65.6163	3	63.5163	68.0279	3.36013	4.07076	Tiparp	TCDD-inducible poly(ADP-ribose) polymerase
1430955_at	3	88.7717	3	81.5163	90.7867	5.28082	13.1044	2810403A07Rik	RIKEN cDNA 2810403A07 gene
1420540_a_at	3	88.8028	3	107.667	90.7867	8.56805	4.13554	Rit1	Ras-like without CAAX 1
1428710_at	3	88.8028	3	89.5163	90.7867	17.0543	18.4286	Rit1	Ras-like without CAAX 1
1431314_a_at	3	88.9069	3	90.7867	90.7867	37.9525	26.5278	5830417I10Rik	RIKEN cDNA 5830417I10 gene
1450848_at	3	89.0094	3	83.5163	96.2201	4.67232	6.7467	Dap3	death associated protein 3
1422853_at	3	89.5045	3	90.7867	90.7867	4.69807	3.8238	Shc1	src homology 2 domain-containing transforming protein C1
1422854_at	3	89.5045	3	103.975	106.57	8.19549	6.91685	Shc1	src homology 2 domain-containing transforming protein C1
1415756_a_at	3	90.5739	3	90.7867	90.7867	4.94628	4.28043	Snapap	SNAP-associated protein
1426578_s_at	3	90.5739	3	101.534	96.2201	8.58741	6.31007	Snapap	SNAP-associated protein
1430976_a_at	3	94.5287	3	83.5163	96.2201	3.08144	6.84154	Mrpl9	mitochondrial ribosomal protein L9
1427297_at	3	94.5287	3	90.7867	90.7867	9.14102	14.2611	Mrpl9	mitochondrial ribosomal protein L9
1416689_at	3	94.6982	3	87.5163	90.7867	7.02119	7.08678	Tuft1	tuftelin 1
1452818_at	3	101.068	3	106.778	90.7867	7.87332	3.14677	Ttf2	transcription termination factor, RNA polymerase II
1451809_s_at	3	121.147	3	125.125	125.511	9.75913	9.58512	Rwdd3	RWD domain containing 3
1430167_a_at	3	121.148	3	132.244	122.245	4.08303	6.94925	Rwdd3	RWD domain containing 3
1419115_at	3	121.284	3	129.516	122.245	36.5123	28.7413	Alg14	asparagine-linked glycosylation 14 homolog (yeast)
1416679_at	3	121.751	3	125.125	122.245	33.9076	30.4917	Abcd3	ATP-binding cassette, sub-family D (ALD), member 3
1455970_at	3	122.85	3	120.9	120.9	4.90905	6.05566	Pde5a	Phosphodiesterase 5A, cGMP-specific
1458341_x_at	3	122.851	3	135.855	120.9	4.53513	3.75907	---	---
1426972_at	3	123.335	3	131.951	122.475	5.76716	7.40842	Sec24d	SEC24 related gene family, member D (S. cerevisiae)
1454751_at	3	123.36	3	127.516	126.328	22.679	22.8729	G430022H21Rik	RIKEN cDNA G430022H21 gene
1460184_at	3	131.223	3	135.855	131.951	4.83621	8.54308	Hadhsc	L-3-hydroxyacyl-Coenzyme A dehydrogenase, short chain
1450909_at	3	138.464	3	135.855	146.218	7.35482	10.2881	Eif4e	eukaryotic translation initiation factor 4E
1425266_a_at	3	138.863	3	142.883	146.218	14.725	10.5862	Rap1gds1	RAP1, GTP-GDP dissociation stimulator 1
1451135_at	3	142.703	3	146.218	146.218	4.50423	6.9622	Gtf2b	general transcription factor IIB
1415984_at	3	153.86	3	157.193	157.193	5.1765	3.44184	Acadm	acyl-Coenzyme A dehydrogenase, medium chain
1451848_a_at	3	154.533	3	148.406	159.046	4.39757	4.49466	Cryz	crystallin, zeta
1423649_at	4	3.47619	4	3.6308	11.1692	7.64033	10.0331	Tmem68	transmembrane protein 68
1430000_at	4	3.48232	4	3.6308	6.6381	4.38977	4.75116	B230117O15Rik	RIKEN cDNA B230117O15 gene
1450417_a_at	4	3.75873	4	6.8003	20.6842	4.95534	4.16366	Rps20 /// LOC245676 /// LOC623568	ribosomal protein S20 /// similar to 40S ribosomal protein S20 /// similar to 40S ribosomal protein S20
1444318_at	4	3.86789	4	3.6308	3.6308	10.1458	4.77513	Chchd7	Coiled-coil-helix-coiled-coil-helix domain containing 7
1433735_a_at	4	15.1933	4	3.6308	5.9223	5.54463	4.47527	Tmem64	transmembrane protein 64
1454709_at	4	15.1933	4	6.8003	15.3175	9.1216	6.90247	Tmem64	transmembrane protein 64
1434307_at	4	15.2123	4	5.9223	9.3909	4.08996	7.41985	Tmem64	transmembrane protein 64
1419367_at	4	15.8443	4	11.6308	15.3175	7.86384	15.2793	Decr1	2,4-dienoyl CoA reductase 1, mitochondrial
1432270_a_at	4	41.1476	4	25.2373	39.4985	3.85268	6.79503	Chmp5	chromatin modifying protein 5
1416247_at	4	41.9035	4	41.5282	49.4509	6.42862	17.9677	Dctn3	dynactin 3
1450187_a_at	4	41.944	4	44.9268	49.4509	6.78387	9.60865	Galt	galactose-1-phosphate uridyl transferase
1417505_s_at	4	41.9487	4	45.465	40.0727	6.27837	12.4293	Il11ra1 /// Il11ra2 /// LOC621887	interleukin 11 receptor, alpha chain 1 /// interleukin 11 receptor, alpha chain 2 /// similar to interleukin 11 receptor, alpha chain 2
1419188_s_at	4	41.958	4	42.9407	42.9407	13.2277	8.09944	Ccl27	chemokine (C-C motif) ligand 27
1438155_x_at	4	43.0387	4	41.5282	42.9407	20.0461	30.4607	Pigo	phosphatidylinositol glycan anchor biosynthesis, class O
1450662_at	4	43.463	4	42.9407	42.9407	14.3456	19.251	Tesk1	testis specific protein kinase 1
1424741_s_at	4	43.5835	4	57.6308	45.465	4.34352	10.2489	Creb3	cAMP responsive element binding protein 3
1434338_at	4	43.6068	4	42.9407	44.9268	7.70925	3.27597	1110029E03Rik	RIKEN cDNA 1110029E03 gene
1425196_a_at	4	43.6753	4	42.9407	40.0727	11.6334	17.0612	Hint2	histidine triad nucleotide binding protein 2
1417083_at	4	47.4958	4	47.6308	43.6687	18.4346	26.6231	Sec61b	Sec61 beta subunit
1449664_s_at	4	49.6773	4	49.4509	49.4509	13.7839	12.7211	Rnf20	ring finger protein 20
1427325_s_at	4	62.8535	4	61.7992	77.6891	3.66892	4.63349	AI597013	expressed sequence AI597013
1424458_at	4	73.7231	4	69.5851	61.7992	5.53086	8.54223	Jmjd2c	jumonji domain containing 2C
1428760_at	4	82.889	4	81.9572	78.8549	12.513	7.10615	Snapc3	small nuclear RNA activating complex, polypeptide 3
1453077_a_at	4	82.889	4	82.7797	94.8678	4.87571	3.01363	Snapc3	small nuclear RNA activating complex, polypeptide 3
1442148_at	4	82.9257	4	81.9572	77.6891	5.47225	4.82031	Psip1	PC4 and SFRS1 interacting protein 1
1417166_at	4	82.9269	4	81.9572	81.6053	13.9695	7.27566	Psip1	PC4 and SFRS1 interacting protein 1
1460403_at	4	82.9331	4	81.9572	81.6053	7.23169	4.67989	Psip1	PC4 and SFRS1 interacting protein 1
1451469_at	4	84.5693	4	86.1866	83.3006	3.23147	3.59301	D530005L17Rik	RIKEN cDNA D530005L17 gene
1429665_at	4	86.0501	4	82.7797	85.4753	3.43876	7.34019	6230416J20Rik	RIKEN cDNA 6230416J20 gene
1442044_at	4	86.3239	4	73.4356	85.4753	8.09121	6.88393	---	Transcribed locus
1416142_at	4	86.3253	4	83.6308	85.4753	22.29	24.6459	Rps6 /// LOC214738 /// LOC384383 /// LOC545640 /// LOC626259 /// LOC629575 /// LOC638497 /// LOC639593 /// LOC639750 /// LOC666577 /// LOC667739 /// LOC667922 /// LOC671306 /// LOC671432 /// LOC672620 /// LOC675985	ribosomal protein S6 /// similar to 40S ribosomal protein S6 /// similar to 40S ribosomal protein S6 /// similar to 40S ribosomal protein S6 /// similar to 40S ribosomal protein S6 /// similar to 40S ribosomal protein S6 /// similar to 40S ribosomal protein S6 /// similar to 40S ribosomal protein S6 /// similar to 40S ribosomal protein S6 /// similar to 40S ribosomal protein S6 /// similar to 40S…
1435209_at	4	87.8266	4	89.6308	85.4753	5.83586	6.24964	BC057079	cDNA sequence BC057079
1424438_a_at	4	101.146	4	97.6308	94.8678	7.17726	9.10232	Leprot	leptin receptor overlapping transcript
1431067_at	4	106.632	4	103.014	105.299	19.9063	23.9069	6330404A07Rik	RIKEN cDNA 6330404A07 gene
1418662_at	4	106.637	4	105.631	105.299	40.0193	46.9533	2210012G02Rik	RIKEN cDNA 2210012G02 gene
1452894_at	4	109.702	4	107.631	110.386	12.2841	14.8545	Elavl4	ELAV (embryonic lethal, abnormal vision, Drosophila)-like 4 (Hu antigen D)
1433875_at	4	115.272	4	103.014	110.743	7.02911	7.91641	4732418C07Rik	RIKEN cDNA 4732418C07 gene
1434934_at	4	115.283	4	115.65	114.784	12.3439	24.4865	Atpaf1	ATP synthase mitochondrial F1 complex assembly factor 1
1436358_at	4	115.311	4	114.784	110.386	7.16278	10.9857	Atpaf1	ATP synthase mitochondrial F1 complex assembly factor 1
1449113_at	4	116.079	4	115.65	102.179	18.0243	7.30745	Gpbp1l1	GC-rich promoter binding protein 1-like 1
1436691_x_at	4	116.197	4	115.65	114.784	9.95732	9.61029	Prdx1	peroxiredoxin 1
1425043_s_at	4	116.207	4	125.631	114.784	17.5807	17.81	0610037D15Rik	RIKEN cDNA 0610037D15 gene
1453639_s_at	4	116.207	4	121.836	117.9	10.1668	8.28213	0610037D15Rik	RIKEN cDNA 0610037D15 gene
1416769_s_at	4	117.382	4	117.713	124.541	4.02799	9.04704	Atp6v0b	ATPase, H+ transporting, lysosomal V0 subunit B
1442417_at	4	117.913	4	117.713	115.65	22.843	23.8392	Med8	mediator of RNA polymerase II transcription, subunit 8 homolog (yeast)
1442124_at	4	118.718	4	121.836	119.875	17.8419	21.5317	AI450326	expressed sequence AI450326
1438220_at	4	119.118	4	118.876	118.876	14.2871	17.5714	Foxj3	forkhead box J3
1441573_at	4	119.958	4	121.836	126.311	7.09227	4.24131	Scmh1	Sex comb on midleg homolog 1
1422467_at	4	122.339	4	119.591	117.713	6.67569	12.8003	Ppt1	palmitoyl-protein thioesterase 1
1417462_at	4	122.361	4	121.836	121.836	35.3374	47.9069	Cap1	CAP, adenylate cyclase-associated protein 1 (yeast)
1417461_at	4	122.361	4	121.836	121.836	40.599	50.1877	Cap1	CAP, adenylate cyclase-associated protein 1 (yeast)
1429485_a_at	4	124.18	4	121.836	115.65	6.66743	6.80784	Utp11l	UTP11-like, U3 small nucleolar ribonucleoprotein, (yeast)
1432488_a_at	4	124.217	4	129.631	124.541	5.84014	12.8356	Sf3a3 /// LOC626830	splicing factor 3a, subunit 3 /// similar to splicing factor 3a, subunit 3 (predicted)
1451330_a_at	4	124.244	4	123.631	121.836	12.6693	15.1341	Inpp5b	inositol polyphosphate-5-phosphatase B
1455545_at	4	124.352	4	123.631	121.836	10.5018	17.8825	1110065P20Rik	RIKEN cDNA 1110065P20 gene
1428481_s_at	4	124.421	4	126.311	124.541	6.4754	3.30335	Cdca8	cell division cycle associated 8
1436847_s_at	4	124.421	4	126.311	124.541	8.09454	6.81845	Cdca8	cell division cycle associated 8
1428133_at	4	124.569	4	124.541	124.541	16.1126	16.0398	Snip1	Smad nuclear interacting protein 1
1459773_x_at	4	124.576	4	119.875	121.836	3.09517	20.9416	Snip1	Smad nuclear interacting protein 1
1434193_at	4	126.631	4	124.541	121.836	6.21795	4.4552	Zmym6	zinc finger, MYM-type 6
1422179_at	4	126.854	4	127.631	126.311	15.0604	22.6029	Gjb4	gap junction membrane channel protein beta 4
1419526_at	4	132.246	4	145.631	146.784	5.47553	7.77843	Fgr	Gardner-Rasheed feline sarcoma viral (Fgr) oncogene homolog
1442804_at	4	132.273	4	135.631	132.45	8.18877	7.50926	Fgr	Gardner-Rasheed feline sarcoma viral (Fgr) oncogene homolog
1458060_at	4	134.014	4	133.631	133.594	16.3603	23.0722	---	10 days lactation, adult female mammary gland cDNA, RIKEN full-length enriched library, clone:D730006C24 product:unclassifiable, full insert sequence
1453155_at	4	134.17	4	133.594	137.216	4.37293	8.83503	Tmem50a	transmembrane protein 50A
1423392_at	4	134.486	4	147.631	133.594	4.89607	4.91808	Clic4	chloride intracellular channel 4 (mitochondrial)
1423393_at	4	134.486	4	146.557	133.594	9.03462	9.53986	Clic4	chloride intracellular channel 4 (mitochondrial)
1434315_at	4	134.721	4	146.557	143.446	6.95419	4.24822	Npal3	NIPA-like domain containing 3
1424639_a_at	4	135.219	4	118.876	132.45	3.1835	3.53943	Hmgcl	3-hydroxy-3-methylglutaryl-Coenzyme A lyase
1455790_at	4	135.465	4	142.185	137.216	6.03132	8.27611	E2f2	E2F transcription factor 2
1439845_at	4	137.516	4	137.216	137.216	21.4642	21.1689	---	Transcribed locus
1416493_at	4	137.577	4	132.735	137.216	8.42428	3.39769	Ddost	dolichyl-di-phosphooligosaccharide-protein glycotransferase
1451148_at	4	137.585	4	137.216	140.079	12.9045	6.30434	Pink1	PTEN induced putative kinase 1
1441937_s_at	4	137.585	4	137.216	137.216	25.7149	18.7524	Pink1	PTEN induced putative kinase 1
1418005_at	4	140.233	4	146.784	133.594	4.09759	9.91605	Sdhb	succinate dehydrogenase complex, subunit B, iron sulfur (Ip)
1418962_at	4	140.339	4	140.705	140.705	4.44497	3.9056	Necap2	NECAP endocytosis associated 2
1434482_at	4	140.385	4	149.631	140.079	4.30482	4.4102	D4Ertd22e	DNA segment, Chr 4, ERATO Doi 22, expressed
1416224_at	4	140.717	4	140.705	140.079	6.79951	6.24848	Zbtb17	zinc finger and BTB domain containing 17
1449141_at	4	140.848	4	141.224	141.224	44.6088	44.2713	Fblim1	filamin binding LIM protein 1
1418569_at	4	140.848	4	141.224	140.705	33.6449	46.4962	Fblim1	filamin binding LIM protein 1
1434781_at	4	141.032	4	141.224	140.705	17.5011	12.2145	---	---
1436209_at	4	141.034	4	140.705	141.224	13.4365	9.92808	Dnajc16	DnaJ (Hsp40) homolog, subfamily C, member 16
1426125_a_at	4	141.066	4	140.079	141.459	12.441	12.5743	Casp9	caspase 9
1431339_a_at	4	141.131	4	141.224	141.224	6.59696	7.43243	Efhd2	EF hand domain containing 2
1419309_at	4	142.534	4	132.735	143.446	6.31589	4.27626	Pdpn	podoplanin
1434566_a_at	4	142.687	4	142.335	127.166	5.44118	4.64287	4732496O08Rik	RIKEN cDNA 4732496O08 gene
1416289_at	4	146.754	4	141.631	146.557	19.5483	26.6711	Plod1	procollagen-lysine, 2-oxoglutarate 5-dioxygenase 1
1460596_at	4	146.921	4	145.631	146.557	30.9149	32.8705	Agtrap	angiotensin II, type I receptor-associated protein
1422965_at	4	146.924	4	143.446	149.729	6.9597	8.42731	Agtrap	angiotensin II, type I receptor-associated protein
1424213_at	4	147.278	4	143.446	146.557	12.2003	14.1725	Ubiad1	UbiA prenyltransferase domain containing 1
1433916_at	4	149.891	4	141.459	142.185	4.15587	3.42259	Vamp3	vesicle-associated membrane protein 3
1456245_x_at	4	149.891	4	141.459	143.446	6.72818	4.41089	Vamp3	vesicle-associated membrane protein 3
1418872_at	5	8.80419	5	7.2584	4.3169	21.94	26.3396	Abcb1b	ATP-binding cassette, sub-family B (MDR/TAP), member 1B
1449818_at	5	8.89972	5	8.6488	8.6488	7.18065	14.0154	Abcb4	ATP-binding cassette, sub-family B (MDR/TAP), member 4
1450966_at	5	8.97204	5	11.0868	8.6488	11.2772	8.79356	Crot	carnitine O-octanoyltransferase
1440845_at	5	9.10667	5	12.3169	4.9741	8.26579	8.21458	E030031F02Rik	RIKEN cDNA E030031F02 gene
1436337_at	5	9.10674	5	12.3169	4.9741	11.5652	4.76427	Dmtf1 /// 4930420K17Rik	cyclin D binding myb-like transcription factor 1 /// RIKEN cDNA 4930420K17 gene
1426611_at	5	21.2971	5	20.0401	23.5222	3.65553	7.55371	Psmc2	proteasome (prosome, macropain) 26S subunit, ATPase 2
1415830_at	5	21.9983	5	26.3169	22.7983	6.53384	5.31121	Orc5l	origin recognition complex, subunit 5-like (S. cerevisiae)
1434092_at	5	23.8944	5	20.0401	22.7983	15.9689	20.9098	Nos3as	nitric oxide synthase 3 antisense
1460635_at	5	23.9511	5	23.1875	19.4101	11.4819	18.0724	Fastk	Fas-activated serine/threonine kinase
1423863_at	5	24.0752	5	25.4448	23.5222	15.9285	10.4205	Abcf2	ATP-binding cassette, sub-family F (GCN20), member 2
1452776_a_at	5	24.196	5	23.1875	30.8422	8.13184	3.04012	Nub1	negative regulator of ubiquitin-like proteins 1
1452777_a_at	5	24.196	5	23.1875	36.1913	6.73803	5.66319	Nub1	negative regulator of ubiquitin-like proteins 1
1423831_at	5	24.3728	5	23.1875	36.1913	3.59157	4.77725	Prkag2	protein kinase, AMP-activated, gamma 2 non-catalytic subunit
1426220_at	5	30.9245	5	38.3169	35.4695	3.80858	3.93886	4930471M23Rik	RIKEN cDNA 4930471M23 gene
1418148_at	5	31.2267	5	29.2628	29.2628	19.8454	25.4186	Abhd1	abhydrolase domain containing 1
1428380_at	5	31.3252	5	30.3169	35.4695	3.22923	3.66998	0610007C21Rik	RIKEN cDNA 0610007C21 gene
1437758_a_at	5	31.8127	5	39.7212	35.4695	3.99426	3.84729	Slc4a1ap	solute carrier family 4 (anion exchanger), member 1, adaptor protein
1448190_at	5	31.8905	5	27.2422	27.2422	5.15365	5.50205	Mrpl33	mitochondrial ribosomal protein L33
1424840_at	5	31.901	5	26.7874	30.8422	4.26681	5.06115	Rbks	ribokinase
1424841_s_at	5	31.901	5	29.2628	30.8422	9.22621	10.9452	Rbks	ribokinase
1431328_at	5	32.7689	5	28.3169	30.8422	15.0404	9.7097	Ppp1cb	protein phosphatase 1, catalytic subunit, beta isoform
1455228_at	5	34.1926	5	26.3169	35.4695	6.32463	4.55178	Whsc1	Wolf-Hirschhorn syndrome candidate 1 (human)
1427248_at	5	34.2148	5	28.3169	26.7874	12.859	5.99694	Whsc2	Wolf-Hirschhorn syndrome candidate 2 (human)
1453129_a_at	5	35.2831	5	39.7212	22.7983	3.15168	3.78461	Rgs12	regulator of G-protein signaling 12
1448411_at	5	37.2544	5	40.7713	35.4695	10.1397	11.3724	Wfs1	Wolfram syndrome 1 homolog (human)
1435102_a_at	5	38.4245	5	37.4797	35.4695	9.2245	12.6832	Stx18	syntaxin 18
1448317_at	5	38.5484	5	36.1913	31.3767	15.4401	6.43414	Tmem128	transmembrane protein 128
1426568_at	5	38.6375	5	46.3169	37.7662	3.26018	10.5796	Slc2a9	solute carrier family 2 (facilitated glucose transporter), member 9
1423990_at	5	41.9132	5	27.2422	41.6816	4.21641	6.73233	Rab28	RAB28, member RAS oncogene family
1431630_a_at	5	65.0827	5	58.0466	58.0466	4.0583	3.56905	Klf3	Kruppel-like factor 3 (basic)
1449049_at	5	65.2038	5	66.9282	58.0466	9.04832	15.5113	Tlr1	toll-like receptor 1
1448648_at	5	65.2492	5	56.3169	66.9282	4.688	4.28134	9130005N14Rik	RIKEN cDNA 9130005N14 gene
1417272_at	5	65.2492	5	72.2118	75.0116	3.82035	4.63476	9130005N14Rik	RIKEN cDNA 9130005N14 gene
1426530_a_at	5	65.4352	5	54.3169	66.9282	9.41261	8.58387	Klhl5	kelch-like 5 (Drosophila)
1416308_at	5	65.6924	5	56.3169	75.0116	8.0042	7.28227	Ugdh	UDP-glucose dehydrogenase
1441238_at	5	65.9426	5	66.9282	66.9282	11.1232	10.9671	9030416H16Rik	RIKEN cDNA 9030416H16 gene
1438021_at	5	66.2957	5	68.3169	58.0466	28.7589	15.1984	BC013481	cDNA sequence BC013481
1423597_at	5	67.8995	5	72.2118	66.9282	5.31878	3.46226	Atp8a1	ATPase, aminophospholipid transporter (APLT), class I, type 8A, member 1
1460204_at	5	73.0349	5	72.2118	72.5365	6.13067	11.0398	Tec	cytoplasmic tyrosine kinase, Dscr28C related (Drosophila)
1452286_at	5	73.2276	5	72.2118	75.0116	5.68624	7.23501	5033405K12Rik	RIKEN cDNA 5033405K12 gene
1436678_at	5	73.9119	5	74.3169	75.0116	6.37818	9.34666	---	---
1419667_at	5	73.9122	5	74.3169	66.9282	4.66546	6.06934	Sgcb	sarcoglycan, beta (dystrophin-associated glycoprotein)
1435325_at	5	74.281	5	76.8352	75.0116	9.27435	5.33326	Usp46	ubiquitin specific peptidase 46
1439241_x_at	5	77.2297	5	75.0116	75.0116	27.2778	34.8554	Srd5a2l	steroid 5 alpha-reductase 2-like
1428944_at	5	87.1837	5	94.3169	90.4199	8.718	9.54729	Ube1l2	ubiquitin-activating enzyme E1-like 2
1421011_at	5	104.231	5	98.3169	101.239	15.9398	32.1126	Dhrs8	dehydrogenase/reductase (SDR family) member 8
1424861_at	5	104.792	5	105.611	108.004	4.82756	4.1501	D930016D06Rik	RIKEN cDNA D930016D06 gene
1423666_s_at	5	108.141	5	105.611	125.262	4.4217	3.4638	Rpl5 /// LOC382740 /// LOC665407 /// LOC668032 /// LOC672748 /// LOC675821	ribosomal protein L5 /// similar to 60S ribosomal protein L5 /// similar to 60S ribosomal protein L5 /// similar to 60S ribosomal protein L5 /// similar to 60S ribosomal protein L5 /// similar to 60S ribosomal protein L5
1426704_at	5	108.809	5	108.004	108.004	15.5046	13.5473	Gak	cyclin G associated kinase
1440801_s_at	5	113.152	5	113.761	113.761	12.83	13.5527	Adrbk2	adrenergic receptor kinase, beta 2
1436009_at	5	114.384	5	115.838	113.761	6.80439	3.80347	Usp30	ubiquitin specific peptidase 30
1455673_at	5	114.385	5	113.761	113.761	6.3419	6.56702	Alkbh2	alkB, alkylation repair homolog 2 (E. coli)
1417545_at	5	114.883	5	96.817	113.761	3.9428	7.52288	Trpv4	transient receptor potential cation channel, subfamily V, member 4
1438869_at	5	115.035	5	108.004	108.004	9.45568	8.77572	4930515G01Rik	RIKEN cDNA 4930515G01 gene
1428370_at	5	115.069	5	112.317	113.761	18.3156	26.7224	1500011B03Rik	RIKEN cDNA 1500011B03 gene
1457155_at	5	121.827	5	119.162	126.222	4.06749	5.69288	Aldh2	aldehyde dehydrogenase 2, mitochondrial
1448143_at	5	121.828	5	120.317	119.162	22.1549	27.1511	Aldh2	aldehyde dehydrogenase 2, mitochondrial
1437410_at	5	121.831	5	122.317	116.431	3.65438	9.23851	Aldh2	aldehyde dehydrogenase 2, mitochondrial
1451521_x_at	5	134.905	5	136.906	134.157	4.38819	5.83529	Wbscr1	Williams-Beuren syndrome chromosome region 1 homolog (human)
1417627_a_at	5	134.941	5	132.317	134.157	6.0795	10.3321	Limk1	LIM-domain containing, protein kinase
1424667_a_at	5	136.533	5	136.317	135.364	6.29937	13.7786	Cutl1	cut-like 1 (Drosophila)
1424668_a_at	5	136.533	5	136.042	134.157	16.0659	17.7831	Cutl1	cut-like 1 (Drosophila)
1434683_at	5	136.551	5	135.364	135.364	10.4002	15.1319	Cutl1	Cut-like 1 (Drosophila)
1451745_a_at	5	137.267	5	135.364	135.364	12.2796	5.69661	Znhit1	zinc finger, HIT domain containing 1
1415901_at	5	137.272	5	146.188	135.364	3.41536	4.03241	Plod3	procollagen-lysine, 2-oxoglutarate 5-dioxygenase 3
1416087_at	5	137.32	5	135.364	135.364	11.0977	11.6009	Ap1s1	adaptor protein complex AP-1, sigma 1
1441320_a_at	5	137.39	5	148.317	135.364	3.17779	4.36828	AI413194	expressed sequence AI413194
1460452_at	5	137.826	5	136.906	136.906	7.24516	6.91889	Mospd3	motile sperm domain containing 3
1453961_a_at	5	137.83	5	140.317	142.955	5.8682	3.92168	Mospd3	motile sperm domain containing 3
1418801_at	5	138.336	5	131.054	136.906	5.71844	3.49094	Zkscan1	zinc finger with KRAB and SCAN domains 1
1449732_at	5	138.364	5	140.317	135.364	3.16062	3.12868	Zipro1	zinc finger proliferation 1
1448760_at	5	138.834	5	130.317	136.906	3.39838	7.64637	Zfp68	zinc finger protein 68
1417688_at	5	139.008	5	136.906	136.042	4.095	7.61253	BC004044	cDNA sequence BC004044
1457648_x_at	5	139.063	5	136.906	134.157	4.30304	3.49296	BC004044	cDNA sequence BC004044
1443827_x_at	5	139.063	5	136.906	135.364	3.39841	6.51751	BC004044	cDNA sequence BC004044
1455885_at	5	141.005	5	149	136.906	3.30772	4.35011	6530401C20Rik	RIKEN cDNA 6530401C20 gene
1451975_at	5	143.804	5	142.317	142.429	10.6583	11.7693	2810453I06Rik	RIKEN cDNA 2810453I06 gene
1436006_at	5	144.157	5	142.317	142.429	7.7725	11.9762	Eif2ak1	eukaryotic translation initiation factor 2 alpha kinase 1
1416532_at	5	145.091	5	143.728	142.955	14.4173	11.0096	Trrap	transformation/transcription domain-associated protein
1416226_at	5	145.368	5	146.188	131.054	9.7662	3.71998	Arpc1b	actin related protein 2/3 complex, subunit 1B
1433611_s_at	5	145.394	5	143.728	144.963	9.81355	5.96892	Bud31	BUD31 homolog (yeast)
1424469_a_at	5	145.433	5	148.799	146.188	5.27419	3.7505	Cpsf4	cleavage and polyadenylation specific factor 4
1451486_at	5	148.189	5	146.188	142.429	7.32991	5.04312	1200006F02Rik	RIKEN cDNA 1200006F02 gene
1457043_at	5	150.029	5	146.317	148.799	3.9604	3.93755	B3galtl	beta 1,3-galactosyltransferase-like
1448303_at	6	48.9662	6	50.6226	50.6226	32.6456	37.3798	Gpnmb	glycoprotein (transmembrane) nmb
1439345_at	6	48.9999	6	50.6226	52.703	15.2243	16.1324	Gpnmb	glycoprotein (transmembrane) nmb
1421534_at	6	50.1297	6	50.6226	52.703	4.49891	4.68504	Dfna5h	deafness, autosomal dominant 5 homolog (human)
1428484_at	6	50.2261	6	50.6226	50.6226	10.2193	6.79997	Osbpl3	oxysterol binding protein-like 3
1420565_at	6	52.0849	6	52.703	38.3385	3.67277	3.39133	Hoxa1	homeo box A1
1418337_at	6	70.6953	6	59.5204	64.3959	11.4107	7.4189	Rpia	ribose 5-phosphate isomerase A
1460209_at	6	72.2482	6	61.5204	73.8095	13.5218	11.0752	Usp39	ubiquitin specific peptidase 39
1423729_a_at	6	72.2892	6	61.5204	73.8095	9.28184	10.4281	2500002L14Rik	RIKEN cDNA 2500002L14 gene
1420624_a_at	6	72.3147	6	77.9092	77.9092	7.77782	3.7324	Vamp8	vesicle-associated membrane protein 8
1450355_a_at	6	72.474	6	73.8095	73.8095	19.2785	18.3002	Capg	capping protein (actin filament), gelsolin-like
1451392_at	6	72.4954	6	73.8095	83.8526	4.09327	4.63515	Rbed1	RNA binding motif and ELMO domain 1
1436695_x_at	6	72.4954	6	59.5204	73.65	7.77321	9.38884	Rbed1	RNA binding motif and ELMO domain 1
1424716_at	6	72.528	6	75.9822	77.9092	4.21419	5.35062	Retsat	retinol saturase (all trans retinol 13,14 reductase)
1423307_s_at	6	72.5379	6	75.9822	65.7266	10.3541	9.96423	Tgoln1 /// Tgoln2	trans-golgi network protein /// trans-golgi network protein 2
1449180_at	6	72.7706	6	73.65	80.6954	7.38761	7.79708	Kcmf1	potassium channel modulatory factor 1
1418694_at	6	72.7706	6	75.9822	73.8095	10.3193	14.9588	Kcmf1	potassium channel modulatory factor 1
1449358_at	6	82.9126	6	89.5204	85.1468	5.13945	10.2689	D6Mm5e	DNA segment, Chr 6, Miriam Meisler 5, expressed
1417790_at	6	82.9966	6	83.8526	88.6965	6.69838	12.9597	Dok1	docking protein 1
1425601_a_at	6	83.1027	6	97.7935	83.8526	11.0321	8.41905	Rtkn	rhotekin
1424484_at	6	83.2917	6	91.1224	83.8526	5.0781	7.88687	Mobk1b	MOB1, Mps One Binder kinase activator-like 1B (yeast)
1424483_at	6	83.2917	6	83.5204	82.4728	12.4567	16.2024	---	---
1452768_at	6	83.7347	6	99.5833	83.8526	8.18198	6.72431	Tex261	testis expressed gene 261
1425410_at	6	85.8814	6	89.5204	80.6954	7.40917	5.31989	Tprkb	Tp53rk binding protein
1431708_a_at	6	86.3795	6	85.1468	91.1224	13.7002	12.3904	Tia1	cytotoxic granule-associated RNA binding protein 1
1457658_x_at	6	86.7033	6	85.1468	91.1224	7.13938	4.07026	Anxa4	annexin A4
1418229_s_at	6	86.9755	6	89.5204	86.3188	9.71933	8.18659	Hirip5	histone cell cycle regulation defective interacting protein 5
1435841_s_at	6	95.4396	6	82.4728	99.1248	8.68762	8.13677	Suclg2	succinate-Coenzyme A ligase, GDP-forming, beta subunit
1427441_a_at	6	95.4399	6	96.7091	99.1248	5.41186	8.18449	Suclg2	succinate-Coenzyme A ligase, GDP-forming, beta subunit
1433671_at	6	97.0754	6	99.5833	99.1248	7.46414	10.017	A130022J15Rik	RIKEN cDNA A130022J15 gene
1426594_at	6	97.2523	6	101.52	99.5833	6.01599	7.28993	Frmd4b	FERM domain containing 4B
1452123_s_at	6	97.2523	6	99.5833	97.5288	4.92433	7.96711	Frmd4b	FERM domain containing 4B
1438169_a_at	6	97.2523	6	106.96	99.5833	4.80797	6.67447	Frmd4b	FERM domain containing 4B
1424603_at	6	108.073	6	123.355	123.355	3.49681	3.89121	Sumf1	sulfatase modifying factor 1
1460203_at	6	108.179	6	109.52	113.566	5.95772	6.77272	Itpr1	inositol 1,4,5-triphosphate receptor 1
1417279_at	6	108.179	6	106.96	112.061	6.50643	13.027	Itpr1	inositol 1,4,5-triphosphate receptor 1
1428137_at	6	108.788	6	106.96	112.061	29.371	30.8534	Arl8b	ADP-ribosylation factor-like 8B
1451218_at	6	108.794	6	107.52	107.21	3.23429	17.0759	Edem1	ER degradation enhancer, mannosidase alpha-like 1
1448815_at	6	113.293	6	113.901	116.023	8.74711	7.95332	Ogg1	8-oxoguanine DNA-glycosylase 1
1423589_at	6	113.347	6	107.52	112.525	8.50159	6.87683	Arpc4	actin related protein 2/3 complex, subunit 4
1428612_at	6	114.637	6	103.52	116.984	10.8216	18.2424	Atg7	autophagy-related 7 (yeast)
1449490_at	6	115.808	6	117.572	116.358	29.6394	39.8608	Mbd4	methyl-CpG binding domain protein 4
1440384_at	6	115.985	6	123.355	123.355	3.74148	6.6562	Tmcc1	transmembrane and coiled coil domains 1
1433588_at	6	116.174	6	119.52	116.168	3.76599	8.77658	D6Wsu116e	DNA segment, Chr 6, Wayne State University 116, expressed
1429642_at	6	116.23	6	98.6735	117.572	7.99091	5.38213	Anubl1	AN1, ubiquitin-like, homolog (Xenopus laevis)
1441962_at	6	116.376	6	111.52	123.355	5.42321	6.79992	Alox5	arachidonate 5-lipoxygenase
1457049_at	6	120.76	6	123.355	123.355	5.85981	14.4897	Atp6v1e1	VATPase, H+ transporting, lysosomal V1 subunit E1
1449712_s_at	6	120.761	6	123.52	123.355	12.5612	16.4237	Atp6v1e1	VATPase, H+ transporting, lysosomal V1 subunit E1
1451755_a_at	6	122.543	6	121.52	123.355	24.327	20.3294	Apobec1	apolipoprotein B editing complex 1
1448106_at	6	122.84	6	135.52	123.355	5.12944	4.39048	Necap1	NECAP endocytosis associated 1
1424834_s_at	6	146.065	6	145.52	147.998	11.8824	11.4377	Itpr2	inositol 1,4,5-triphosphate receptor 2
1424833_at	6	146.065	6	147.998	149.434	12.1839	12.7023	Itpr2	inositol 1,4,5-triphosphate receptor 2
1427287_s_at	6	146.068	6	147.998	147.998	4.81801	5.86367	Itpr2	inositol 1,4,5-triphosphate receptor 2
1419211_s_at	6	146.507	6	137.52	149.823	5.54237	9.24714	4933424B01Rik	RIKEN cDNA 4933424B01 gene
1431020_a_at	6	146.535	6	141.52	147.998	11.2979	18.4343	Fgfr1op2	FGFR1 oncogene partner 2
1452664_a_at	6	146.559	6	149.434	147.998	8.34439	10.6944	Tm7sf3	transmembrane 7 superfamily member 3
1425806_a_at	6	146.6	6	149.61	149.61	6.70219	6.7357	Surb7	SRB7 (suppressor of RNA polymerase B) homolog (S. cerevisiae)
1435878_at	6	146.734	6	147.998	148.155	13.2576	14.7777	Stk38l	serine/threonine kinase 38 like
1421266_s_at	7	28.4678	7	25.3071	23.3071	10.1037	4.8302	Nfkbib	nuclear factor of kappa light chain gene enhancer in B-cells inhibitor, beta
1455576_at	7	28.5055	7	25.3071	23.3071	33.993	32.5259	5830482F20Rik	RIKEN cDNA 5830482F20 gene
1424101_at	7	28.5197	7	31.245	23.3071	3.09662	6.65793	Hnrpl	heterogeneous nuclear ribonucleoprotein L
1452674_a_at	7	28.6801	7	40.8422	30.1871	5.30667	6.87941	Eif3s12	eukaryotic translation initiation factor 3, subunit 12
1449813_at	7	29.4928	7	23.3071	23.3071	22.1048	14.3085	Zfp30	zinc finger protein 30
1453230_at	7	29.6415	7	25.3071	23.4136	4.63023	5.40344	Zfp74	zinc finger protein 74
1426400_a_at	7	29.8952	7	23.3071	31.2042	6.50859	12.6895	Capns1	calpain, small subunit 1
1448533_at	7	29.9329	7	25.3071	41.6452	4.57225	12.3948	Ckap1	cytoskeleton-associated protein 1
1455390_at	7	30.0175	7	23.3071	23.4136	10.1633	17.1683	1500005P14Rik /// Alkbh6	RIKEN cDNA 1500005P14 gene /// alkB, alkylation repair homolog 6 (E. coli)
1420712_a_at	7	30.8075	7	25.3071	30.1871	14.8098	10.6277	Hpn	hepsin
1418738_at	7	30.8253	7	27.3071	30.4341	12.248	9.57269	Scn1b	sodium channel, voltage-gated, type I, beta
1428437_at	7	34.0534	7	23.3071	30.1871	5.03646	4.56071	Lsm14a	LSM14 homolog A (SCD6, S. cerevisiae)
1434216_a_at	7	35.2559	7	41.6452	41.6452	6.59939	6.55657	Nudt19	nudix (nucleoside diphosphate linked moiety X)-type motif 19
1450638_at	7	35.3507	7	27.3071	23.4136	4.55704	5.26526	Pdcd5	programmed cell death 5
1455468_at	7	35.3943	7	23.3071	30.4341	3.5388	3.8229	---	0 day neonate kidney cDNA, RIKEN full-length enriched library, clone:D630029P09 product:unclassifiable, full insert sequence
1433913_at	7	37.6688	7	32.096	32.096	23.4645	31.4287	C80913	expressed sequence C80913
1424671_at	7	37.9297	7	37.6806	23.4136	3.09144	3.21931	Plekhf1	pleckstrin homology domain containing, family F (with FYVE domain) member 1
1448419_at	7	37.9719	7	31.3071	31.2042	26.1885	33.8165	Pop4	processing of precursor 4, ribonuclease P/MRP family, (S. cerevisiae)
1438786_a_at	7	41.4014	7	36.4952	39.1819	8.0628	8.64195	2610021A01Rik /// LOC668572	RIKEN cDNA 2610021A01 gene /// similar to zinc finger protein 347
1439295_x_at	7	42.4334	7	33.3071	39.1819	11.8713	19.3743	LOC434179	hypothetical LOC434179
1460017_at	7	42.4334	7	39.3071	33.7206	17.72	21.606	LOC434179	hypothetical LOC434179
1416353_at	7	44.4177	7	37.6806	33.7206	3.535	3.47441	Nr1h2	nuclear receptor subfamily 1, group H, member 2
1423590_at	7	44.4404	7	37.6806	33.7206	5.5805	7.32328	Napsa	napsin A aspartic peptidase
1428865_at	7	44.8591	7	41.6452	41.6452	3.62513	4.18009	Bcl2l12	BCL2-like 12 (proline rich)
1425764_a_at	7	45.4435	7	37.3117	36.7682	16.6785	20.4246	Bcat2	branched chain aminotransferase 2, mitochondrial
1450112_a_at	7	51.7472	7	59.7099	44.7948	6.72341	5.55594	Gas2	growth arrest specific 2
1429146_at	7	51.8651	7	43.3071	43.7359	10.825	8.88588	6620401M08Rik	RIKEN cDNA 6620401M08 gene
1421063_s_at	7	59.8664	7	41.6452	41.6452	5.23484	6.75343	Snrpn /// Snurf	small nuclear ribonucleoprotein N /// SNRPN upstream reading frame
1435382_at	7	62.2286	7	57.3793	40.8422	4.82612	6.74935	Ndn	necdin
1435383_x_at	7	62.2286	7	48.1965	40.8422	4.74701	7.2945	Ndn	necdin
1455792_x_at	7	62.2286	7	48.1965	40.8422	5.2156	5.86747	Ndn	necdin
1438477_a_at	7	64.2791	7	57.1292	49.822	23.0487	28.8598	Mcee	methylmalonyl CoA epimerase
1452095_a_at	7	65.9586	7	58.6343	57.8844	12.6074	16.3845	H47	histocompatibility 47
1451985_at	7	66.1377	7	58.9727	49.822	8.5222	5.04653	Lrrk1	leucine-rich repeat kinase 1
1451986_s_at	7	66.1377	7	58.6343	49.822	10.6598	11.0464	Lrrk1	leucine-rich repeat kinase 1
1435010_at	7	66.5234	7	64.5554	63.1673	5.7343	7.68569	Asb7	ankyrin repeat and SOCS box-containing protein 7
1452347_at	7	67.1101	7	59.7099	61.4623	4.03041	3.21867	Mef2a	myocyte enhancer factor 2A
1427185_at	7	67.1101	7	58.9727	64.8445	4.42622	4.50786	Mef2a	myocyte enhancer factor 2A
1426818_at	7	68.6105	7	68.1625	63.1673	3.00288	4.39215	Arrdc4	arrestin domain containing 4
1434537_at	7	74.1489	7	70.0269	67.3599	11.0051	16.6021	Slco3a1	solute carrier organic anion transporter family, member 3a1
1418030_at	7	74.1554	7	68.1625	67.3599	7.34017	10.228	Slco3a1	solute carrier organic anion transporter family, member 3a1
1448918_at	7	74.1554	7	68.1625	67.3599	7.17941	14.7234	Slco3a1	solute carrier organic anion transporter family, member 3a1
1453601_at	7	79.9652	7	73.3071	73.035	18.3316	15.7375	Zfp710	zinc finger protein 710
1428692_at	7	80.2166	7	70.6553	73.2288	25.2523	14.9992	Hddc3	HD domain containing 3
1427368_x_at	7	80.2513	7	73.035	67.3599	4.25814	3.20939	Fes	feline sarcoma oncogene
1448953_at	7	80.3283	7	67.3599	73.2288	6.35114	8.90342	Blm	Bloom syndrome homolog (human)
1434998_at	7	80.5851	7	79.0481	69.1056	13.1466	3.15502	Iqgap1	IQ motif containing GTPase activating protein 1
1417379_at	7	80.5857	7	75.3071	68.1625	13.1934	10.0013	Iqgap1	IQ motif containing GTPase activating protein 1
1423519_at	7	83.9855	7	79.0481	79.4912	8.44267	9.61174	2210412D01Rik	RIKEN cDNA 2210412D01 gene
1422032_a_at	7	84.4912	7	77.3071	79.8176	7.84372	3.16079	Zfand6	zinc finger, AN1-type domain 6
1416382_at	7	88.1533	7	81.6885	74.6361	5.71409	4.71859	Ctsc	cathepsin C
1429331_at	7	92.6141	7	82.3715	81.6885	7.90338	6.63472	4632427E13Rik	RIKEN cDNA 4632427E13 gene
1452190_at	7	92.7505	7	82.7187	82.7187	27.79	20.8373	Prcp	prolylcarboxypeptidase (angiotensinase C)
1452191_at	7	92.7505	7	82.7187	82.7187	17.4832	21.8342	Prcp	prolylcarboxypeptidase (angiotensinase C)
1433839_at	7	96.938	7	91.3071	88.7682	4.26469	5.75844	Nars2	asparaginyl-tRNA synthetase 2 (mitochondrial)(putative)
1419829_a_at	7	97.1827	7	91.3071	89.1564	23.222	24.5923	Gab2	Growth factor receptor bound protein 2-associated protein 2
1455887_at	7	97.2468	7	102.423	89.1564	3.013	4.44831	Alg8	asparagine-linked glycosylation 8 homolog (yeast, alpha-1,3-glucosyltransferase)
1416366_at	7	97.2752	7	93.7409	105.793	14.0028	10.7184	LOC675851	similar to NADH dehydrogenase (ubiquinone) 1, subcomplex unknown, 2
1427548_a_at	7	97.5719	7	90.8121	109.172	3.02231	9.72332	Clns1a	chloride channel, nucleotide-sensitive, 1A
1436935_x_at	7	97.5937	7	86.4601	89.1564	17.3914	6.59568	Clns1a	chloride channel, nucleotide-sensitive, 1A
1438435_at	7	98.0888	7	91.3071	102.423	14.6311	13.293	Phca	phytoceramidase, alkaline
1459771_x_at	7	98.089	7	93.7409	89.1564	5.14587	7.41277	Phca	phytoceramidase, alkaline
1453179_at	7	98.0907	7	93.9752	93.9752	6.19123	6.00817	Phca	phytoceramidase, alkaline
1455600_at	7	99.352	7	91.3071	91.735	32.4453	51.4648	Rps3	ribosomal protein S3
1434208_at	7	99.7943	7	93.7409	90.8121	21.4549	23.5248	2900057K09Rik	RIKEN cDNA 2900057K09 gene
1443733_x_at	7	99.9562	7	91.3071	93.9752	8.80355	18.9018	Pold3	polymerase (DNA-directed), delta 3, accessory subunit
1426839_at	7	99.9562	7	98.0848	89.1564	10.6018	14.4687	Pold3	polymerase (DNA-directed), delta 3, accessory subunit
1426838_at	7	99.9562	7	91.3071	89.1564	17.4348	33.721	Pold3	polymerase (DNA-directed), delta 3, accessory subunit
1423357_at	7	100.033	7	93.7409	88.7682	11.5499	10.9432	2610209A20Rik	RIKEN cDNA 2610209A20 gene
1418499_a_at	7	100.053	7	91.3071	88.2787	6.80615	4.24077	Kcne3	potassium voltage-gated channel, Isk-related subfamily, gene 3
1447776_x_at	7	100.514	7	102.423	92.1584	7.31613	4.68013	Rab6	RAB6, member RAS oncogene family
1434374_at	7	100.581	7	88.2787	93.9752	10.6884	6.04512	B930006L02Rik	RIKEN cDNA B930006L02 gene
1454950_at	7	100.581	7	90.8121	82.7187	4.13013	6.41791	B930006L02Rik	RIKEN cDNA B930006L02 gene
1434375_at	7	100.581	7	91.3071	90.8121	32.093	23.3084	B930006L02Rik	RIKEN cDNA B930006L02 gene
1450318_a_at	7	100.871	7	87.3071	106.619	8.10225	9.64184	P2ry2	purinergic receptor P2Y, G-protein coupled 2
1452202_at	7	101.378	7	93.9752	91.735	15.8587	22.5318	Pde2a	phosphodiesterase 2A, cGMP-stimulated
1447708_x_at	7	101.386	7	91.3071	88.2787	13.1022	11.393	Pde2a	phosphodiesterase 2A, cGMP-stimulated
1447707_s_at	7	101.386	7	93.7409	91.735	21.0688	26.086	Pde2a	phosphodiesterase 2A, cGMP-stimulated
1460394_a_at	7	101.696	7	91.3071	106.619	17	20.1159	Inppl1	inositol polyphosphate phosphatase-like 1
1426504_a_at	7	101.893	7	109.172	98.0848	4.52364	4.08487	Rnf121	ring finger protein 121
1422573_at	7	110.559	7	103.307	98.0848	5.22789	4.98186	Ampd3	AMP deaminase 3
1426371_at	7	113.305	7	106.953	109.172	9.68357	6.02073	Mlstd2	male sterility domain containing 2
1453550_a_at	7	113.305	7	106.953	111.39	3.85706	10.2799	Mlstd2	male sterility domain containing 2
1457262_at	7	117.924	7	111.239	111.239	6.22774	7.20059	2610207I05Rik	RIKEN cDNA 2610207I05 gene
1435777_at	7	118.276	7	106.953	107.825	3.1676	3.66461	E030018N11Rik	RIKEN cDNA E030018N11 gene
1432304_a_at	7	118.532	7	111.239	110.775	5.05776	6.12787	9030624J02Rik	RIKEN cDNA 9030624J02 gene
1426695_at	7	118.566	7	110.775	110.775	9.66547	5.98012	9030624J02Rik	RIKEN cDNA 9030624J02 gene
1436007_a_at	7	119.506	7	111.39	114.698	9.80704	17.3486	Thumpd1	THUMP domain containing 1
1421034_a_at	7	125.343	7	117.025	119.549	8.90586	11.2478	Il4ra	interleukin 4 receptor, alpha
1455219_at	7	126.481	7	116.24	119.42	11.736	18.2841	1110030E23Rik	RIKEN cDNA 1110030E23 gene
1433466_at	7	126.884	7	119.42	119.549	8.25646	9.40821	AI467606	expressed sequence AI467606
1446926_at	7	127.783	7	119.549	119.549	8.73445	19.1873	Pycard	PYD and CARD domain containing
1417347_at	7	127.783	7	119.42	136.639	4.8742	7.25315	Pycard	PYD and CARD domain containing
1417346_at	7	127.783	7	121.307	119.549	13.6213	22.955	Pycard	PYD and CARD domain containing
1438417_at	7	139.1	7	131.307	131.745	9.67558	10.7695	Pwwp2	PWWP domain containing 2
1416871_at	7	139.83	7	131.745	131.745	8.65486	5.27973	Adam8	a disintegrin and metallopeptidase domain 8
1434858_x_at	7	139.888	7	133.307	131.745	7.64232	18.9604	Zfp511	zinc finger protein 511
1460572_a_at	7	139.888	7	131.745	131.745	8.4399	21.4482	Zfp511	zinc finger protein 511
1453570_x_at	7	140.705	7	131.745	129.243	3.64728	10.7356	Bet1l	blocked early in transport 1 homolog (S. cerevisiae)-like
1426372_a_at	7	140.705	7	136.639	131.745	4.35004	17.4054	Bet1l	blocked early in transport 1 homolog (S. cerevisiae)-like
1452898_at	8	23.6849	8	26.3767	23.1046	3.10211	4.45571	---	---
1417253_at	8	42.8963	8	46.9684	41.3452	33.9283	33.0836	Frg1	FSHD region gene 1
1430713_s_at	8	72.8232	8	70.0211	74.6489	9.99109	11.6003	Ndufa13	NADH dehydrogenase (ubiquinone) 1 alpha subcomplex, 13
1455505_at	8	72.8361	8	82.1809	74.6489	5.20886	10.2221	Gatad2a	GATA zinc finger domain containing 2A
1451198_at	8	72.8368	8	70.0211	70.0211	8.58162	14.2277	Gatad2a	GATA zinc finger domain containing 2A
1426250_s_at	8	72.946	8	68.3767	70.0211	16.8868	14.9592	9130404D08Rik	RIKEN cDNA 9130404D08 gene
1424859_at	8	73.2142	8	77.8905	70.0211	7.78422	7.37998	Homer3	homer homolog 3 (Drosophila)
1433496_at	8	74.5485	8	64.3767	70.0211	7.88681	6.67784	Glt25d1	glycosyltransferase 25 domain containing 1
1433495_at	8	74.5485	8	70.0211	70.0211	12.162	9.13956	Glt25d1	glycosyltransferase 25 domain containing 1
1433883_at	8	75.0643	8	80.3767	74.6489	7.66512	8.82497	Tpm4	tropomyosin 4
1424355_a_at	8	75.6194	8	84.3234	70.0211	3.78547	3.58399	Sin3b	transcriptional regulator, SIN3B (yeast)
1431188_a_at	8	77.9564	8	75.7464	76.0292	7.75753	9.61304	Tom1 /// LOC545878	target of myb1 homolog (chicken) /// similar to TOM1
1435055_a_at	8	77.9658	8	75.7464	87.2042	6.59082	10.4636	Tom1 /// LOC545878	target of myb1 homolog (chicken) /// similar to TOM1
1426027_a_at	8	80.147	8	76.0292	87.2042	4.23933	5.71494	Arhgap10	Rho GTPase activating protein 10
1428592_s_at	8	83.8765	8	82.5447	82.5447	28.3493	22.1723	Usp38	ubiquitin specific peptidase 38
1416267_at	8	86.3246	8	82.1809	82.5447	14.298	30.9653	Scoc	short coiled-coil protein
1430999_a_at	8	86.3257	8	84.3234	81.7406	15.3278	27.7853	Scoc	short coiled-coil protein
1418394_a_at	8	86.6135	8	84.3234	95.0797	5.54958	5.10323	Cd97	CD97 antigen
1420286_at	8	87.3051	8	92.3767	82.8723	7.27711	3.77275	---	Transcribed locus
1417606_a_at	8	87.732	8	89.0316	95.0797	4.35146	3.19262	Calr	calreticulin
1456170_x_at	8	87.7322	8	86.3673	105.105	6.49495	3.18927	Calr	calreticulin
1433806_x_at	8	87.7322	8	86.3673	100.714	5.4914	5.42248	Calr	calreticulin
1424117_at	8	87.9711	8	68.3767	87.2042	12.2017	29.2457	BC056474	cDNA sequence BC056474
1437767_s_at	8	94.0136	8	94.3767	87.2042	6.04602	13.608	Fts	fused toes
1448223_at	8	94.2036	8	98.8703	95.0797	7.2203	12.1104	Fto	fatso
1430829_s_at	8	94.3578	8	103.867	95.0797	9.55446	20.5205	Fto	fatso
1424831_at	8	97.4425	8	103.867	87.6319	5.57106	6.89441	Cpne2	copine II
1444073_at	8	118.587	8	119.753	118.109	5.84135	7.56572	Maf	avian musculoaponeurotic fibrosarcoma (v-maf) AS42 oncogene homolog
1436906_at	8	125.352	8	123.989	123.989	9.07693	5.37594	Rnf166	ring finger protein 166
1417105_at	8	125.498	8	123.989	131.007	5.3234	3.65972	Trappc2l	trafficking protein particle complex 2-like
1451098_at	8	126.09	8	125.766	123.989	3.3801	4.13369	Pcoln3	procollagen (type III) N-endopeptidase
1425610_s_at	8	127.118	8	127.73	125.766	22.0246	18.8276	Galnt2	UDP-N-acetyl-alpha-D-galactosamine:polypeptide N-acetylgalactosaminyltransferase 2
1426756_at	8	127.181	8	127.73	125.766	20.5801	8.39823	Galnt2	UDP-N-acetyl-alpha-D-galactosamine:polypeptide N-acetylgalactosaminyltransferase 2
1460570_at	8	127.255	8	128.377	124.752	8.35714	15.2472	Pgbd5	piggyBac transposable element derived 5
1436348_at	8	127.792	8	129.648	125.766	4.66578	3.61295	---	Transcribed locus
1449591_at	9	5.30887	9	5.5839	3.6164	10.9081	5.08089	Casp4	caspase 4, apoptosis-related cysteine peptidase
1430752_at	9	7.83638	9	3.9681	8.3505	12.1179	13.8492	C330006D17Rik	RIKEN cDNA C330006D17 gene
1417168_a_at	9	43.8204	9	45.6164	47.9957	17.3508	18.8054	Usp2	ubiquitin specific peptidase 2
1417169_at	9	43.8204	9	45.6164	47.9957	19.5676	20.4469	Usp2	ubiquitin specific peptidase 2
1423650_at	9	43.8615	9	47.9957	48.292	8.65144	7.16349	Rnf26	ring finger protein 26
1433661_at	9	44.0037	9	48.5357	47.9957	6.34161	10.7907	BC034204	cDNA sequence BC034204
1423291_s_at	9	44.1315	9	47.9957	56.6464	12.3737	7.17506	Hyou1	hypoxia up-regulated 1
1423290_at	9	44.1315	9	47.9957	47.9957	12.3212	14.1369	Hyou1	hypoxia up-regulated 1
1424598_at	9	44.3559	9	45.6164	47.9957	13.275	11.1728	Ddx6	DEAD (Asp-Glu-Ala-Asp) box polypeptide 6
1436134_at	9	44.8804	9	50.9645	47.9957	5.1071	5.52784	Scn2b	sodium channel, voltage-gated, type II, beta
1441947_x_at	9	45.9537	9	48.5357	47.9957	4.20246	7.22259	BC033915	cDNA sequence BC033915
1435211_at	9	49.1905	9	50.9645	48.7281	8.52184	7.03664	Ttc12 /// LOC640389	tetratricopeptide repeat domain 12 /// similar to tetratricopeptide repeat domain 12
1428265_at	9	50.6188	9	48.292	33.9801	5.77335	3.35811	Ppp2r1b	protein phosphatase 2 (formerly 2A), regulatory subunit A (PR 65), beta isoform
1450247_a_at	9	57.2418	9	57.3082	56.6464	15.1704	8.57528	Scamp5	secretory carrier membrane protein 5
1448153_at	9	57.3194	9	53.1936	50.4324	3.94875	6.59206	Cox5a	cytochrome c oxidase, subunit Va
1417599_at	9	58.3223	9	64.9045	58.5276	9.59426	10.6295	Cd276	CD276 antigen
1454837_at	9	62.6368	9	61.6164	69.0557	8.18783	11.2285	Cln6	ceroid-lipofuscinosis, neuronal 6
1424713_at	9	62.6561	9	64.9045	68.4982	7.74714	11.2158	Calml4	calmodulin-like 4
1455941_s_at	9	62.9618	9	64.9045	64.9045	18.7935	25.5056	Map2k5	mitogen activated protein kinase kinase 5
1424008_a_at	9	65.4286	9	73.9583	66.6795	3.78526	7.24892	Rbpms2	RNA binding protein with multiple splicing 2
1419152_at	9	65.6882	9	69.0557	69.0557	3.02366	7.13027	2810417H13Rik	RIKEN cDNA 2810417H13 gene
1439616_at	9	67.7965	9	69.0557	68.4982	3.32644	8.32765	---	Transcribed locus
1458129_at	9	69.1843	9	72.0825	83.2704	8.37344	7.85638	Rora	RAR-related orphan receptor alpha
1431390_a_at	9	71.277	9	73.9583	69.8495	5.24137	11.1928	Grinl1a	glutamate receptor, ionotropic, N-methyl D-aspartate-like 1A
1427670_a_at	9	71.6428	9	76.5924	76.5924	4.1683	3.37906	Tcf12	transcription factor 12
1450685_at	9	74.8243	9	75.6164	76.5924	3.10927	6.52608	Arpp19	cAMP-regulated phosphoprotein 19
1419754_at	9	74.8582	9	79.6164	76.5924	26.3538	30.403	Myo5a	myosin Va
1431320_a_at	9	74.9701	9	79.6164	73.9583	21.6848	27.9348	Myo5a	myosin Va
1436051_at	9	75.0077	9	79.6164	76.5924	21.4622	29.5186	9630007J19Rik	RIKEN cDNA 9630007J19 gene
1431771_a_at	9	82.6267	9	85.4613	86.0234	17.2697	14.1934	Irak1bp1	interleukin-1 receptor-associated kinase 1 binding protein 1
1431777_a_at	9	82.9067	9	85.4613	86.0234	20.1155	18.6591	Hmgn3	high mobility group nucleosomal binding domain 3
1434109_at	9	83.3451	9	85.4613	86.0234	8.57452	10.8959	Sh3bgrl2	SH3 domain binding glutamic acid-rich protein like 2
1428228_at	9	86.3514	9	93.5249	84.9648	9.313	7.10725	Pgm3	phosphoglucomutase 3
1416632_at	9	86.3781	9	97.934	88.2483	8.89364	7.8572	Mod1 /// LOC624892 /// LOC677317	malic enzyme, supernatant /// similar to NADP-dependent malic enzyme (NADP-ME) (Malic enzyme 1) /// similar to NADP-dependent malic enzyme (NADP-ME) (Malic enzyme 1)
1426307_at	9	86.82	9	92.8007	94.9961	9.98111	5.56419	Cyb5r4	cytochrome b5 reductase 4
1456518_at	9	88.346	9	92.8007	96.2043	12.6176	10.1059	4930422I07Rik	RIKEN cDNA 4930422I07 gene
1418365_at	9	89.8522	9	88.5387	89.0598	12.914	10.6606	Ctsh	cathepsin H
1443814_x_at	9	89.8737	9	88.5387	89.0598	11.8166	11.2628	Ctsh	cathepsin H
1433626_at	9	92.2947	9	96.2043	96.2043	6.59619	4.53769	Plscr4	phospholipid scramblase 4
1433581_at	9	94.3272	9	94.9961	83.2704	3.04797	3.02627	1190002N15Rik	RIKEN cDNA 1190002N15 gene
1437488_at	9	94.4793	9	93.5249	92.4183	7.34144	6.45467	Slc9a9	solute carrier family 9 (sodium/hydrogen exchanger), isoform 9
1433719_at	9	95.0392	9	93.5249	92.4183	8.14627	5.90672	Slc9a9	solute carrier family 9 (sodium/hydrogen exchanger), isoform 9
1455351_at	9	95.2659	9	97.6164	98.729	10.147	10.7601	AU023006	expressed sequence AU023006
1419656_at	9	96.8846	9	91.6164	97.934	4.3315	4.80642	Slc25a36	solute carrier family 25, member 36
1455113_at	9	99.2877	9	88.5387	102.382	9.92384	10.8066	Armc8	armadillo repeat containing 8
1429535_at	9	99.289	9	99.6164	86.0234	3.38761	3.96384	Armc8	armadillo repeat containing 8
1451641_at	9	99.3851	9	92.4183	97.934	4.28607	8.95478	Dbr1	debranching enzyme homolog 1 (S. cerevisiae)
1426388_s_at	9	102.693	9	105.725	110.835	4.94142	10.3254	Ryk	receptor-like tyrosine kinase
1451789_a_at	9	102.693	9	97.934	106.171	11.8018	14.498	Ryk	receptor-like tyrosine kinase
1437494_at	9	107.113	9	109.616	103.974	13.2808	7.41758	Mapkapk3	mitogen-activated protein kinase-activated protein kinase 3
1424703_at	9	107.186	9	110.254	110.254	7.98253	9.10169	Hemk1	HemK methyltransferase family member 1
1430287_s_at	9	107.186	9	107.616	110.835	11.4734	16.9224	Hemk1	HemK methyltransferase family member 1
1448855_at	9	107.413	9	102.506	110.835	3.67931	4.37529	Rassf1	Ras association (RalGDS/AF-6) domain family 1
1427964_at	9	114.638	9	113.616	120.499	4.41334	4.394	Cmtm8	CKLF-like MARVEL transmembrane domain containing 8
1422510_at	9	118.775	9	115.616	121.148	4.05295	5.42655	Ctdspl	CTD (carboxy-terminal domain, RNA polymerase II, polypeptide A) small phosphatase-like
1426022_a_at	9	118.906	9	121.616	121.148	30.2539	26.3901	Vill	villin-like
1426933_at	9	119.087	9	117.624	125.04	8.0733	6.72148	Oxsr1	oxidative-stress responsive 1
1422260_x_at	9	123.97	9	126.414	126.414	4.64133	4.71192	Ccr5	chemokine (C-C motif) receptor 5
1435363_at	10	6.37915	10	3.924	8.7555	11.5887	13.004	Plekhg1	pleckstrin homology domain containing, family G (with RhoGef domain) member 1
1431086_s_at	10	7.32787	10	6.6066	21.261	6.49307	6.43728	Pcmt1	protein-L-isoaspartate (D-aspartate) O-methyltransferase 1
1427679_at	10	7.3918	10	8.9595	21.261	9.43122	11.16	Lats1	large tumor suppressor
1424043_at	10	7.48308	10	6.8505	4.5219	14.8913	9.92276	Ppil4	peptidylprolyl isomerase (cyclophilin)-like 4
1421553_at	10	11.0336	10	21.5322	22.7488	4.09111	6.31858	Epm2a	epilepsy, progressive myoclonic epilepsy, type 2 gene alpha
1453228_at	10	12.6302	10	15.3708	3.3708	11.7529	6.6817	Stx11	syntaxin 11
1451185_at	10	12.6986	10	12.6538	10.2164	6.62172	6.6299	Sf3b5	splicing factor 3b, subunit 5
1452404_at	10	12.9036	10	12.6538	14.7593	8.69425	8.85651	Phactr2	phosphatase and actin regulator 2
1416046_a_at	10	13.1913	10	12.6538	13.3516	3.60443	19.2867	Fuca2	fucosidase, alpha-L- 2, plasma
1419130_at	10	13.2431	10	5.6076	13.3516	3.01599	4.1677	Deadc1	deaminase domain containing 1
1420679_a_at	10	13.3426	10	15.3708	13.3516	12.4434	7.60084	Aig1	androgen-induced 1
1422018_at	10	13.8178	10	19.4189	19.4189	4.82597	5.55692	Hivep2	human immunodeficiency virus type I enhancer binding protein 2
1441646_at	10	14.345	10	20.854	7.3626	4.30854	3.8413	1110059P08Rik	RIKEN cDNA 1110059P08 gene
1418917_at	10	18.2295	10	26.6759	20.3677	11.0487	22.9196	Hebp2	heme binding protein 2
1449271_a_at	10	18.2295	10	20.3677	19.4189	16.8943	23.6542	Hebp2	heme binding protein 2
1448167_at	10	19.2814	10	20.3677	20.1274	4.55589	5.52451	Ifngr1	interferon gamma receptor 1
1431178_at	10	22.1035	10	10.2164	8.7555	4.79431	5.65931	LOC640488	similar to murine ULBP-like transcript 1
1458238_at	10	67.58	10	69.7133	71.3169	7.31791	10.999	Arid5b	AT rich interactive domain 5B (Mrf1 like)
1452461_a_at	10	87.8632	10	107.501	94.1185	8.40716	12.8038	Gnptab	N-acetylglucosamine-1-phosphate transferase, alpha and beta subunits
1456620_at	10	87.8662	10	88.6976	90.076	9.17119	15.3782	Gnptab	N-acetylglucosamine-1-phosphate transferase, alpha and beta subunits
1435335_a_at	10	87.8761	10	89.4425	95.8983	8.58233	8.65813	Gnptab	N-acetylglucosamine-1-phosphate transferase, alpha and beta subunits
1455901_at	10	87.903	10	95.8983	93.787	6.01563	5.12474	Chpt1	choline phosphotransferase 1
1436313_at	10	89.0685	10	89.4425	92.7541	3.84973	7.29311	Scyl2	SCY1-like 2 (S. cerevisiae)
1436314_at	10	89.0685	10	92.0353	93.787	27.1377	34.5265	Scyl2	SCY1-like 2 (S. cerevisiae)
1416300_a_at	10	90.5464	10	94.1185	90.076	14.8309	16.9577	Slc25a3	solute carrier family 25 (mitochondrial carrier, phosphate carrier), member 3
1435143_at	10	92.6772	10	99.3708	95.8983	6.22317	6.60935	Pctk2	PCTAIRE-motif protein kinase 2
1448797_at	10	92.678	10	99.8191	86.5528	3.62872	6.85374	Elk3	ELK3, member of ETS oncogene family
1417662_at	10	92.678	10	107.683	88.5225	8.04523	7.85559	Elk3	ELK3, member of ETS oncogene family
1434790_a_at	10	92.9043	10	88.5225	95.8983	9.18971	15.5694	Lta4h	leukotriene A4 hydrolase
1418645_at	10	92.9186	10	95.8983	94.1185	5.42485	15.0032	Hal /// LOC638196	histidine ammonia lyase /// similar to Histidine ammonia-lyase (Histidase)
1438197_at	10	93.3995	10	95.8983	95.8983	5.30408	3.91189	Vezt	vezatin, adherens junctions transmembrane protein
1419322_at	10	93.533	10	95.3708	95.8983	5.18735	12.3124	Fgd6	FYVE, RhoGEF and PH domain containing 6
1435467_at	10	93.5742	10	95.8983	102.026	8.47744	7.49936	Fgd6	FYVE, RhoGEF and PH domain containing 6
1428234_at	10	116.749	10	121.549	121.549	7.7132	7.25229	Cpsf6	cleavage and polyadenylation specific factor 6
1451053_a_at	10	117.545	10	125.371	120.377	3.98185	6.52858	Mdm1	transformed mouse 3T3 cell double minute 1
1445709_at	10	117.551	10	121.325	120.716	5.84415	8.31976	Mdm1	transformed mouse 3T3 cell double minute 1
1419235_s_at	10	119.487	10	122.777	120.377	3.77946	5.93385	Helb	helicase (DNA) B
1417015_at	10	120.813	10	121.549	121.549	8.95567	6.28707	Rassf3	Ras association (RalGDS/AF-6) domain family 3
1448547_at	10	120.813	10	125.371	121.549	11.7207	7.4912	Rassf3	Ras association (RalGDS/AF-6) domain family 3
1460315_s_at	10	120.95	10	122.144	121.549	4.02722	3.60786	Tbk1	TANK-binding kinase 1
1428772_at	10	120.99	10	118.9	123.345	9.92561	4.76992	Xpot	exportin, tRNA (nuclear export receptor for tRNAs)
1441682_s_at	10	120.99	10	125.371	123.345	7.59694	6.31602	Xpot	exportin, tRNA (nuclear export receptor for tRNAs)
1440840_at	10	124.622	10	129.75	123.345	9.93601	12.3537	D630004K10Rik	RIKEN cDNA D630004K10 gene
1453380_a_at	10	126.271	10	127.601	130.083	16.5239	17.0505	Xrcc6bp1	XRCC6 binding protein 1
1426975_at	10	126.499	10	131.361	131.714	10.6759	14.4202	4632413K17Rik	RIKEN cDNA 4632413K17 gene
1426974_at	10	126.499	10	130.083	131.714	14.5928	14.6581	4632413K17Rik	RIKEN cDNA 4632413K17 gene
1416387_at	10	126.6	10	131.487	131.714	7.30695	11.4525	Pip5k2c	phosphatidylinositol-4-phosphate 5-kinase, type II, gamma
1423842_a_at	10	127.815	10	131.714	131.487	3.42747	12.781	Rnf41	ring finger protein 41
1432003_a_at	10	127.818	10	131.714	131.487	15.0002	19.2194	Rnf41	ring finger protein 41
1420142_s_at	10	127.961	10	131.361	131.487	23.6894	25.827	Pa2g4	proliferation-associated 2G4
1434341_x_at	11	4.60198	11	5.853	3.2321	27.6478	37.356	1110020P15Rik /// LOC622178	RIKEN cDNA 1110020P15 gene /// similar to ubiquinol-cytochrome c reductase complex 7.2kDa protein isoform a
1434340_at	11	4.60198	11	3.2321	3.2321	30.2373	54.6891	---	---
1435472_at	11	5.09155	11	5.853	3.2321	16.7988	11.8816	Kremen1	kringle containing transmembrane protein 1
1429073_at	11	5.66215	11	5.2703	9.4506	12.638	16.2488	2210015D19Rik	RIKEN cDNA 2210015D19 gene
1445625_at	11	5.70435	11	11.4554	5.6826	5.83623	3.60864	---	Transcribed locus
1448277_at	11	5.77218	11	18.9437	3.2321	3.27845	3.94711	Pold2	polymerase (DNA directed), delta 2, regulatory subunit
1460395_at	11	6.00575	11	8.0385	5.6826	5.84136	7.24895	Nudcd3	NudC domain containing 3
1448422_at	11	6.16983	11	8.0385	3.2321	6.99053	12.6195	Tmed4	transmembrane emp24 protein transport domain containing 4
1448505_at	11	17.1576	11	23.6319	16.8521	4.6421	3.91332	C1d	nuclear DNA binding protein
1453064_at	11	17.8397	11	28.9734	22.9045	12.9074	9.08404	5730466H23Rik	RIKEN cDNA 5730466H23 gene
1436034_at	11	20.1264	11	21.1227	22.9045	9.06054	6.5627	Cep68	centrosomal protein 68
1426461_at	11	21.2211	11	21.1227	18.9437	3.07056	5.87184	Ugp2	UDP-glucose pyrophosphorylase 2
1434486_x_at	11	21.2216	11	18.7752	11.4554	3.97569	6.02058	Ugp2	UDP-glucose pyrophosphorylase 2
1434485_a_at	11	21.2216	11	19.2321	18.9437	3.22528	6.8541	Ugp2	UDP-glucose pyrophosphorylase 2
1451929_a_at	11	26.3714	11	28.7174	27.4054	8.71148	12.7785	Vrk2	vaccinia related kinase 2
1453343_s_at	11	26.3714	11	31.5294	28.9734	5.58233	13.2056	Vrk2	vaccinia related kinase 2
1450901_a_at	11	29.0729	11	28.9734	11.4554	13.1723	7.20407	AW011752	expressed sequence AW011752
1450900_at	11	29.0729	11	29.2321	25.6673	10.3133	24.0211	AW011752	expressed sequence AW011752
1417751_at	11	32.4333	11	33.5371	31.5294	9.67579	10.5475	Stk10	serine/threonine kinase 10
1439578_at	11	45.7759	11	55.0197	55.0197	4.44953	4.24103	Lsm11	U7 snRNP-specific Sm-like protein LSM11
1432393_a_at	11	45.7946	11	55.0197	56.1412	18.7795	18.222	5730409G07Rik	RIKEN cDNA 5730409G07 gene
1424275_s_at	11	48.6498	11	55.0197	56.1412	6.18036	6.9025	Trim41	tripartite motif-containing 41
1428597_at	11	50.0021	11	55.0197	55.0197	12.9944	12.0474	Tbc1d9b	TBC1 domain family, member 9B
1424720_at	11	50.0688	11	47.2321	50.0084	3.75461	4.06765	Mgat4b	mannoside acetylglucosaminyltransferase 4, isoenzyme B
1434131_at	11	50.2326	11	46.4428	45.5274	3.5959	6.54527	Rufy1	RUN and FYVE domain containing 1
1431349_at	11	51.4423	11	46.4428	51.0002	5.26332	5.40435	Hnrpab	heterogeneous nuclear ribonucleoprotein A/B
1455345_at	11	51.6569	11	53.6213	51.0002	9.28658	9.13827	Phf15	PHD finger protein 15
1423149_at	11	52.0755	11	57.8422	52.393	8.99694	8.13771	Skp1a	S-phase kinase-associated protein 1A
1423148_at	11	52.0755	11	42.5425	52.393	11.9208	13.2975	Skp1a	S-phase kinase-associated protein 1A
1417639_at	11	53.8265	11	53.0543	52.393	10.2181	9.87712	Slc22a4	solute carrier family 22 (organic cation transporter), member 4
1427412_s_at	11	54.5007	11	45.5274	42.8471	4.48733	3.08459	Rapgef6	Rap guanine nucleotide exchange factor (GEF) 6
1427689_a_at	11	54.7542	11	57.8422	53.0543	3.18768	4.92356	Tnip1	TNFAIP3 interacting protein 1
1453747_at	11	58.6977	11	57.8422	57.8422	8.96948	10.7111	2810021J22Rik	RIKEN cDNA 2810021J22 gene
1423896_a_at	11	58.7485	11	57.8422	56.1412	4.37918	4.89972	Rnf187	ring finger protein 187
1423897_at	11	58.7485	11	57.8422	60.0412	15.8844	26.5547	Rnf187	ring finger protein 187
1425412_at	11	59.359	11	59.7533	57.3585	7.5476	4.52356	Cias1	cold autoinflammatory syndrome 1 homolog (human)
1438167_x_at	11	59.6079	11	70.7114	66.2901	3.20641	3.21323	Flcn	Folliculin
1418597_at	11	60.5561	11	70.7114	66.2901	6.74541	6.02345	Top3a	topoisomerase (DNA) III alpha
1418060_a_at	11	61.305	11	56.1412	66.2901	4.34535	3.73214	Mapk7	mitogen activated protein kinase 7
1417846_at	11	61.5918	11	62.9485	60.0412	5.8505	3.17567	Ulk2	Unc-51 like kinase 2 (C. elegans)
1440965_at	11	62.2745	11	57.8422	60.0412	13.7989	14.1729	Pigl	Phosphatidylinositol glycan, class L
1416935_at	11	62.3907	11	77.2321	62.3642	5.93211	3.04018	Trpv2	transient receptor potential cation channel, subfamily V, member 2
1436195_at	11	62.421	11	75.2321	66.2901	9.96265	12.0517	BC046404	cDNA sequence BC046404
1451583_a_at	11	62.4649	11	62.7911	62.3642	23.8308	20.6412	BC025076	cDNA sequence BC025076
1436220_at	11	62.5277	11	79.1185	63.1712	3.69061	5.09682	Zfp287	zinc finger protein 287
1417133_at	11	62.9477	11	62.7911	62.3642	6.11116	5.39429	Pmp22	peripheral myelin protein
1422568_at	11	68.6376	11	79.2321	63.1712	9.06432	3.5807	Ndel1	nuclear distribution gene E-like homolog 1 (A. nidulans)
1436019_a_at	11	69.1402	11	53.0543	72.2441	4.47671	8.71015	Trappc1	trafficking protein particle complex 1
1436270_at	11	69.2071	11	70.7114	57.8422	4.51744	5.64104	Gm740	gene model 740, (NCBI)
1416104_at	11	69.4729	11	72.2441	84.1003	7.21294	4.53567	Mpdu1	mannose-P-dolichol utilization defect 1
1442791_x_at	11	69.6183	11	70.7114	63.1712	5.12166	4.86421	6720407P12Rik	RIKEN cDNA 6720407P12 gene
1431081_a_at	11	69.6628	11	66.2901	70.7114	6.52361	12.9462	Plscr3	phospholipid scramblase 3
1449020_at	11	69.6629	11	70.7114	68.4982	6.24425	9.95868	Plscr3	phospholipid scramblase 3
1417796_at	11	69.7302	11	72.2441	68.4982	12.4038	7.89814	Gps2	G protein pathway suppressor 2
1453056_at	11	70.033	11	77.2321	79.1185	10.2307	10.3789	Slc16a13	solute carrier family 16 (monocarboxylic acid transporters), member 13
1426239_s_at	11	70.2488	11	81.2321	67.2224	14.6541	10.0338	Arrb2	arrestin, beta 2
1418718_at	11	70.2704	11	72.2441	67.2224	6.58179	5.25252	Cxcl16	chemokine (C-X-C motif) ligand 16
1449195_s_at	11	70.2704	11	72.2441	67.2224	6.31359	5.81798	Cxcl16	chemokine (C-X-C motif) ligand 16
1424445_at	11	70.3214	11	70.7114	67.2224	15.8364	17.1232	Tm4sf5	transmembrane 4 superfamily member 5
1448822_at	11	70.3416	11	71.2321	65.536	30.5161	34.811	Psmb6	proteasome (prosome, macropain) subunit, beta type 6
1417237_at	11	70.3564	11	70.7114	72.2441	14.2203	12.8336	Pld2	phospholipase D2
1449018_at	11	70.468	11	70.7114	72.2441	11.1575	10.9537	Pfn1	profilin 1
1424746_at	11	70.5456	11	70.7114	72.2441	28.0156	31.1377	---	---
1443856_at	11	70.7574	11	71.2321	66.2901	20.7176	21.254	---	---
1441814_s_at	11	70.7891	11	70.7114	80.242	8.6537	3.84507	Rpain	RPA interacting protein
1435101_at	11	70.8238	11	67.4637	68.4982	16.9687	7.91387	Derl2	Der1-like domain family, member 2
1448438_at	11	70.8261	11	68.3418	53.0543	4.94059	3.88248	Derl2	Der1-like domain family, member 2
1424717_at	11	70.8358	11	68.0395	72.2441	32.7396	37.2265	Mis12	MIS12 homolog (yeast)
1433998_at	11	71.9701	11	60.3253	72.2441	4.03127	5.52532	4933427D14Rik	RIKEN cDNA 4933427D14 gene
1423036_at	11	72.0237	11	55.0197	67.2224	8.89044	8.47097	Txnl5	thioredoxin-like 5
1417387_at	11	72.028	11	60.0412	72.2441	7.19656	14.0395	Med31	mediator of RNA polymerase II transcription, subunit 31 homolog (yeast)
1447028_at	11	72.0341	11	73.2321	68.0395	7.15958	5.58344	4930563E22Rik	RIKEN cDNA 4930563E22 gene
1443698_at	11	72.1179	11	75.2321	65.2816	14.0944	16.0619	Fbxo39	F-box protein 39
1436943_at	11	72.5934	11	81.2321	66.2901	6.58343	4.95037	Cyb5d2	cytochrome b5 domain containing 2
1438691_at	11	72.7295	11	72.2441	72.2441	43.3306	43.0814	Zzef1	zinc finger, ZZ-type with EF hand domain 1
1434192_at	11	72.742	11	72.2441	65.536	4.67166	4.81456	Zzef1	zinc finger, ZZ-type with EF hand domain 1
1421129_a_at	11	72.7774	11	72.2441	66.2901	9.44421	17.4341	Atp2a3	ATPase, Ca++ transporting, ubiquitous
1460719_a_at	11	72.8153	11	84.1003	69.1732	3.30591	6.58708	P2rx1	purinergic receptor P2X, ligand-gated ion channel, 1
1417912_at	11	72.9917	11	72.2441	65.536	13.4706	13.6349	Tmem93	transmembrane protein 93
1456419_at	11	80.1767	11	60.3253	80.242	4.96732	4.27469	5730455P16Rik	RIKEN cDNA 5730455P16 gene
1438714_at	11	80.2195	11	81.2321	80.242	9.76265	6.90734	Zfp207	zinc finger protein 207
1440253_at	11	80.2891	11	68.0395	79.1185	11.3311	11.9448	---	---
1454817_at	11	93.6753	11	98.8276	92.7689	7.10611	5.90716	Utp18	UTP18, small subunit (SSU) processome component, homolog (yeast)
1441100_at	11	93.7019	11	87.2321	103.996	6.16644	5.23611	Mbtd1	mbt domain containing 1
1417261_at	11	93.7285	11	91.2321	97.3644	12.2729	9.03999	Mbtd1	mbt domain containing 1
1428988_at	11	94.1594	11	96.8243	92.7689	5.28246	5.66224	Abcc3	ATP-binding cassette, sub-family C (CFTR/MRP), member 3
1437449_at	11	94.3559	11	95.9888	100.316	3.8346	4.92893	Rsad1	radical S-adenosyl methionine domain containing 1
1416235_at	11	94.446	11	97.3644	94.8525	7.61413	3.5747	Lrrc59	leucine rich repeat containing 59
1448825_at	11	94.8423	11	97.3644	93.5738	7.38589	9.08727	Pdk2	pyruvate dehydrogenase kinase, isoenzyme 2
1433639_at	11	95.1916	11	93.0972	93.5738	4.25023	8.04602	5730593F17Rik	RIKEN cDNA 5730593F17 gene
1416524_at	11	95.2302	11	97.3644	93.0972	5.13184	3.12444	Spop	speckle-type POZ protein
1452928_at	11	95.648	11	97.3644	97.3644	13.6822	13.9818	Abi3	ABI gene family, member 3
1432526_a_at	11	95.8555	11	97.3644	97.3644	8.30687	7.09565	Snf8	SNF8, ESCRT-II complex subunit, homolog (S. cerevisiae)
1436635_at	11	95.8635	11	97.3644	96.2655	6.63087	4.20629	Ube2z	ubiquitin-conjugating enzyme E2Z (putative)
1415793_at	11	96.7539	11	96.3491	93.5738	5.6812	4.65242	Pnpo	pyridoxine 5'-phosphate oxidase
1418112_at	11	96.8577	11	97.3644	94.8525	12.713	6.73189	Mrpl10	mitochondrial ribosomal protein L10
1435017_at	11	97.5017	11	97.3644	92.7689	22.2129	25.0811	Mel13	melanoma nuclear protein 13
1424902_at	11	97.7393	11	95.9888	98.8276	14.2252	14.1061	Plxdc1	plexin domain containing 1
1421906_at	11	97.9697	11	96.2655	102.291	3.63384	7.14354	Pparbp	peroxisome proliferator activated receptor binding protein
1421907_at	11	97.9697	11	98.8276	100.316	33.7184	14.7295	Pparbp	peroxisome proliferator activated receptor binding protein
1422675_at	11	99.0251	11	98.8276	98.8276	18.4792	17.1839	Smarce1	SWI/SNF related, matrix associated, actin dependent regulator of chromatin, subfamily e, member 1
1452166_a_at	11	99.2013	11	100.316	97.3644	5.46072	7.87052	Krt10	keratin 10
1416459_at	11	103.783	11	103.996	103.996	4.18224	5.71962	Arf2	ADP-ribosylation factor 2
1416458_at	11	103.783	11	105.232	103.996	11.7081	12.8774	Arf2	ADP-ribosylation factor 2
1424832_at	11	114.798	11	115.115	115.115	22.0359	25.1647	4732429D16Rik	RIKEN cDNA 4732429D16 gene
1450982_at	11	114.979	11	113.232	103.996	5.90585	7.03056	Slc9a3r1	solute carrier family 9 (sodium/hydrogen exchanger), isoform 3 regulator 1
1438115_a_at	11	114.997	11	111.232	116.047	6.03897	5.66814	Slc9a3r1	solute carrier family 9 (sodium/hydrogen exchanger), isoform 3 regulator 1
1438116_x_at	11	114.997	11	111.232	115.115	4.09047	6.57213	Slc9a3r1	solute carrier family 9 (sodium/hydrogen exchanger), isoform 3 regulator 1
1418781_at	11	114.999	11	115.115	115.115	12.5594	9.87748	Nat9	NAT9
1424446_at	11	115.292	11	113.232	103.996	8.00965	6.21583	Armc7	armadillo repeat containing 7
1417252_at	11	115.307	11	117.232	115.115	4.71809	5.19596	Nt5c	5',3'-nucleotidase, cytosolic
1416408_at	11	115.988	11	115.115	116.047	7.92701	8.19731	Acox1	acyl-Coenzyme A oxidase 1, palmitoyl
1434427_a_at	11	116.152	11	113.232	115.115	9.31326	26.5877	Rnf157	ring finger protein 157
1453344_at	11	116.488	11	117.232	119.163	4.44269	3.85111	1810032O08Rik	RIKEN cDNA 1810032O08 gene
1418288_at	12	16.5614	12	17.3522	11.25	5.34689	4.40744	Lpin1	lipin 1
1448812_at	12	17.7163	12	23.4176	16.5395	12.2284	13.2712	Hpcal1	hippocalcin-like 1
1420830_x_at	12	21.6364	12	19.7553	19.7553	15.6949	19.992	Ywhaq	tyrosine 3-monooxygenase/tryptophan 5-monooxygenase activation protein, theta polypeptide
1437608_x_at	12	21.6368	12	17.8091	19.7553	16.6493	28.5519	Ywhaq	tyrosine 3-monooxygenase/tryptophan 5-monooxygenase activation protein, theta polypeptide
1460621_x_at	12	21.6368	12	17.8091	19.7553	20.819	20.6619	Ywhaq	tyrosine 3-monooxygenase/tryptophan 5-monooxygenase activation protein, theta polypeptide
1436846_x_at	12	21.6372	12	17.8091	19.7553	27.3979	16.0659	Ywhaq /// LOC546165 /// LOC636369	tyrosine 3-monooxygenase/tryptophan 5-monooxygenase activation protein, theta polypeptide /// similar to 14-3-3 protein theta (14-3-3 protein tau) /// similar to 14-3-3 protein theta (14-3-3 protein tau)
1431345_a_at	12	25.0895	12	19.7553	9.7706	5.03194	3.03783	Taf1b	TATA box binding protein (Tbp)-associated factor, RNA polymerase I, B
1437203_at	12	32.0708	12	19.7553	29.0916	8.48595	5.39305	Cbll1	Casitas B-lineage lymphoma-like 1
1422708_at	12	32.7584	12	23.4176	27.8857	4.63392	5.10985	Pik3cg	phosphoinositide-3-kinase, catalytic, gamma polypeptide
1435081_at	12	33.5626	12	25.8091	27.4995	12.3914	19.3919	Sypl	synaptophysin-like protein
1433953_at	12	40.8255	12	35.8091	37.4665	28.9211	38.9395	Zfp277	zinc finger protein 277
1435241_at	12	52.7974	12	47.2053	45.7843	3.33204	10.7978	D930036F22Rik	RIKEN cDNA D930036F22 gene
1450897_at	12	53.426	12	43.6031	45.7843	3.57981	5.71447	Arhgap5	Rho GTPase activating protein 5
1423194_at	12	53.426	12	42.2408	57.2444	3.68769	8.70154	Arhgap5	Rho GTPase activating protein 5
1445334_at	12	56.0609	12	53.6418	49.0463	5.81985	11.1699	LOC665155	similar to signal recognition particle 54
1416153_at	12	56.0732	12	49.8091	49.0463	11.6095	18.8015	Srp54 /// LOC665155	signal recognition particle 54 /// similar to signal recognition particle 54
1460466_at	12	56.1177	12	49.8091	42.8301	14.8063	18.991	1700047I17Rik /// LOC665155	RIKEN cDNA 1700047I17 gene /// similar to signal recognition particle 54
1425665_a_at	12	56.1486	12	49.8091	53.6418	11.4801	18.2636	Srp54 /// LOC665155	signal recognition particle 54 /// similar to signal recognition particle 54
1429446_at	12	70.2297	12	61.8091	63.88	4.04425	7.45001	Sdccag1	serologically defined colon cancer antigen 1
1434312_at	12	70.2939	12	64.7809	63.88	10.6066	25.9369	AI788669	expressed sequence AI788669
1455726_at	12	70.4962	12	79.8091	63.88	5.02477	3.62495	Gm71	gene model 71, (NCBI)
1428600_at	12	70.93	12	57.9573	66.0229	5.07149	8.03136	3110068G20Rik	RIKEN cDNA 3110068G20 gene
1419078_at	12	70.9373	12	69.8091	66.0229	4.51149	6.27059	Nin	ninein
1450113_at	12	79.6678	12	73.8091	75.2469	5.26177	7.75552	---	---
1434954_at	12	79.7581	12	61.8091	75.2469	3.10096	3.3589	---	---
1416952_at	12	79.7618	12	73.8091	75.2469	9.87515	15.2757	Atp6v1d	ATPase, H+ transporting, lysosomal V1 subunit D
1416951_a_at	12	79.7618	12	73.8091	75.2469	20.7596	25.3375	Atp6v1d	ATPase, H+ transporting, lysosomal V1 subunit D
1420491_at	12	79.7806	12	75.8091	75.2469	30.5658	46.054	Eif2s1	eukaryotic translation initiation factor 2, subunit 1 alpha
1457254_x_at	12	79.8806	12	71.8091	75.2469	5.26814	6.32861	6330442E10Rik	RIKEN cDNA 6330442E10 gene
1418847_at	12	80.0497	12	73.8091	75.2469	3.05133	7.68565	Arg2	arginase type II
1438841_s_at	12	80.0747	12	75.2469	75.2469	5.93614	7.8736	Arg2	arginase type II
1424226_at	12	101.187	12	98.0789	87.0494	7.89567	4.63175	9030617O03Rik	RIKEN cDNA 9030617O03 gene
1455000_at	12	101.278	12	89.8921	96.4688	11.3149	17.4731	Gpr68	G protein-coupled receptor 68
1420936_s_at	12	102.377	12	96.4688	95.1383	32.1545	38.1958	Cpsf2	cleavage and polyadenylation specific factor 2
1426733_at	12	102.97	12	93.6348	100.791	5.84828	7.42921	Itpk1	inositol 1,3,4-triphosphate 5/6 kinase
1440163_at	12	108.624	12	104.242	85.9987	4.3768	3.23392	6030490B17Rik	RIKEN cDNA 6030490B17 gene
1437832_x_at	12	109.308	12	104.242	104.242	14.5959	16.2317	Wars	tryptophanyl-tRNA synthetase
1425726_x_at	12	110.934	12	102.686	109.178	5.2877	4.14207	Ppp2r5c	protein phosphatase 2, regulatory subunit B (B56), gamma isoform
1434206_s_at	12	111.029	12	104.242	104.242	19.8303	17.2435	Ppp2r5c	protein phosphatase 2, regulatory subunit B (B56), gamma isoform
1449383_at	12	113.068	12	104.242	104.242	3.80795	15.0371	Adssl1	adenylosuccinate synthetase like 1
1418377_a_at	12	113.093	12	109.178	104.242	10.3185	5.62983	Siva	Cd27 binding protein (Hindu God of destruction)
1436520_at	12	113.22	12	105.809	104.242	13.7961	19.3394	AI450948	expressed sequence AI450948
1451533_at	12	113.257	12	107.809	104.242	26.2143	29.7807	BC022687	cDNA sequence BC022687
1424940_s_at	12	113.257	12	107.809	104.242	31.1373	35.3121	BC022687	cDNA sequence BC022687
1444233_at	12	113.299	12	104.242	104.242	3.1194	4.65159	Gpr132	G protein-coupled receptor 132
1421139_a_at	12	116.496	12	100.791	109.178	10.5945	18.5907	Zfp386	zinc finger protein 386 (Kruppel-like)
1455840_at	12	118.163	12	109.178	109.178	11.1593	6.20669	Rapgef5	Rap guanine nucleotide exchange factor (GEF) 5
1434076_at	13	8.80221	13	15.7156	9.5718	12.6935	6.72363	Wdr37	WD repeat domain 37
1450873_at	13	8.97172	13	11.3634	3.7156	6.97945	4.55593	Gtpbp4	GTP binding protein 4
1423142_a_at	13	8.97172	13	11.0766	14.0706	25.6062	8.98967	Gtpbp4	GTP binding protein 4
1436153_a_at	13	9.68407	13	11.3634	14.5251	7.11465	4.9812	Zmynd11	zinc finger, MYND domain containing 11
1426531_at	13	9.68408	13	11.3634	3.7156	7.79369	5.60763	Zmynd11	zinc finger, MYND domain containing 11
1426532_at	13	9.68408	13	3.7156	20.2147	3.0538	6.80967	Zmynd11	zinc finger, MYND domain containing 11
1441139_at	13	12.237	13	20.2147	14.0706	6.26972	3.3267	B330003H21	hypothetical protein B330003H21
1458532_at	13	12.2671	13	29.7156	13.3721	6.49211	6.69567	Mtr	5-methyltetrahydrofolate-homocysteine methyltransferase
1437965_at	13	12.4723	13	15.7156	3.7156	3.12502	4.96726	Heatr1	HEAT repeat containing 1
1422662_at	13	12.4937	13	18.48	11.9223	3.42522	5.06018	Lgals8	lectin, galactose binding, soluble 8
1422661_at	13	12.4937	13	18.48	18.24	5.11108	6.83405	Lgals8	lectin, galactose binding, soluble 8
1425705_a_at	13	12.6212	13	11.3634	13.3721	16.0148	15.8509	Ero1lb	ERO1-like beta (S. cerevisiae)
1434714_at	13	12.664	13	11.3634	9.5718	14.2061	18.1571	Ero1lb	ERO1-like beta (S. cerevisiae)
1439256_x_at	13	12.6702	13	18.48	13.1167	5.797	7.74462	Gpr137b /// LOC664862	G protein-coupled receptor 137B /// similar to transmembrane 7 superfamily member 1
1439255_s_at	13	12.6702	13	18.48	9.5718	8.54061	13.5337	Gpr137b /// LOC664862	G protein-coupled receptor 137B /// similar to transmembrane 7 superfamily member 1
1429775_a_at	13	12.672	13	18.24	3.7156	3.0376	7.57301	Gpr137b /// LOC664862 /// LOC673335	G protein-coupled receptor 137B /// similar to transmembrane 7 superfamily member 1 /// similar to transmembrane 7 superfamily member 1
1443208_at	13	12.6954	13	16.6508	13.3721	5.12813	4.03639	Gpr137b	G protein-coupled receptor 137B
1428282_at	13	13.7901	13	18.48	18.24	11.6311	19.23	Tbce	tubulin-specific chaperone e
1454842_a_at	13	13.7909	13	14.5251	14.0706	8.30729	6.476	B3galnt2	UDP-GalNAc:betaGlcNAc beta 1,3-galactosaminyltransferase, polypeptide 2
1429356_s_at	13	13.8428	13	11.3634	3.7156	12.9333	3.82353	Ggps1	geranylgeranyl diphosphate synthase 1
1419505_a_at	13	13.8442	13	11.3634	9.5718	4.58283	6.77284	Ggps1	geranylgeranyl diphosphate synthase 1
1419506_at	13	13.8442	13	11.3634	14.0706	28.5005	17.0022	Ggps1	geranylgeranyl diphosphate synthase 1
1452897_at	13	17.5024	13	18.48	18.24	30.6155	13.6482	Cdc2l5	cell division cycle 2-like 5 (cholinesterase-related cell division controller)
1450870_at	13	17.6657	13	15.7156	18.24	25.6359	15.7548	Rala	v-ral simian leukemia viral oncogene homolog A (ras related)
1449557_at	13	17.9548	13	16.6508	16.8774	11.9123	12.6779	1600012F09Rik /// LOC624446	RIKEN cDNA 1600012F09 gene /// hypothetical LOC624446
1433665_at	13	18.7306	13	18.48	16.6508	25.5261	25.2027	Vps41	vacuolar protein sorting 41 (yeast)
1437901_a_at	13	18.8362	13	18.48	18.24	41.4543	45.0437	Vps41	vacuolar protein sorting 41 (yeast)
1430274_a_at	13	19.3724	13	11.0766	18.24	24.9435	21.6423	Stard3nl	STARD3 N-terminal like
1417764_at	13	37.9847	13	39.4828	38.6682	15.8057	13.2876	Ssr1 /// LOC636537	signal sequence receptor, alpha /// similar to signal sequence receptor, alpha
1432509_at	13	45.9762	13	45.7156	45.95	4.80799	3.83005	5033430I15Rik	RIKEN cDNA 5033430I15 gene
1415794_a_at	13	51.1134	13	45.7156	51.7881	5.37959	3.60534	Spin	spindlin
1436726_s_at	13	53.3402	13	49.7156	52.5383	20.8784	14.8528	Sptlc1	serine palmitoyltransferase, long chain base subunit 1
1428422_at	13	54.6314	13	57.2179	52.5383	11.0693	7.76615	Ubxd8	UBX domain containing 8
1418456_a_at	13	56.2982	13	58.2326	52.5383	3.04643	3.45349	Cxcl14	chemokine (C-X-C motif) ligand 14
1418457_at	13	56.2982	13	58.2326	52.5383	3.24445	5.12287	Cxcl14	chemokine (C-X-C motif) ligand 14
1415698_at	13	59.6443	13	63.3509	63.3509	5.29757	5.56653	Golph2	golgi phosphoprotein 2
1442675_at	13	63.2529	13	62.6015	62.6015	9.78852	14.1148	2010111I01Rik	RIKEN cDNA 2010111I01 gene
1458947_at	13	63.2549	13	62.6015	79.1968	10.17	10.0453	2010111I01Rik	RIKEN cDNA 2010111I01 gene
1460695_a_at	13	63.3105	13	59.7156	76.721	3.8022	3.97569	2010111I01Rik	RIKEN cDNA 2010111I01 gene
1433623_at	13	64.1423	13	63.3509	57.2179	6.57311	10.5341	Zfp367	zinc finger protein 367
1451310_a_at	13	64.3786	13	56.8134	57.2179	6.62938	3.41204	Ctsl	cathepsin L
1422494_s_at	13	64.4471	13	63.3509	63.3509	9.72303	6.53696	Ccrk	cell cycle related kinase
1416369_at	13	65.0798	13	62.6015	63.3509	5.75469	3.8636	Hiatl1	hippocampus abundant transcript-like 1
1439475_at	13	67.8884	13	63.7156	63.3509	19.7687	21.8128	AI929863	expressed sequence AI929863
1455594_at	13	74.6355	13	71.9133	71.9133	28.5695	35.414	Exoc3	exocyst complex component 3
1434750_at	13	74.6372	13	73.7156	62.6015	4.97607	12.3435	Exoc3	exocyst complex component 3
1426688_at	13	74.7886	13	69.7156	71.9133	10.126	6.99027	Sdha	succinate dehydrogenase complex, subunit A, flavoprotein (Fp)
1439068_at	13	75.1572	13	79.7156	79.1968	3.52478	6.2613	Arts1	type 1 tumor necrosis factor receptor shedding aminopeptidase regulator
1459253_at	13	81.3483	13	79.7156	71.9133	5.31982	4.0608	---	---
1449815_a_at	13	91.9353	13	101.716	89.7485	5.83955	5.14993	Ssbp2	single-stranded DNA binding protein 2
1424557_at	13	92.2703	13	87.7156	89.7485	56.1139	46.7914	Zcchc9	zinc finger, CCHC domain containing 9
1447947_at	13	93.5879	13	94.783	89.7485	6.01378	4.58496	Zfyve16	zinc finger, FYVE domain containing 16
1450701_a_at	13	101.569	13	97.7156	94.5527	5.1569	14.499	Gtf2h2	general transcription factor II H, polypeptide 2
1440573_at	13	105.018	13	102.317	107.327	11.8018	9.59579	Erbb2ip	Erbb2 interacting protein
1416105_at	13	120.454	13	115.716	118.132	15.2169	9.37899	Nnt	nicotinamide nucleotide transhydrogenase
1425521_at	13	120.548	13	117.716	118.132	36.3607	57.3889	Paip1	polyadenylate binding protein-interacting protein 1
1441955_s_at	13	120.57	13	117.716	118.132	36.9346	52.3258	Paip1 /// LOC676674	polyadenylate binding protein-interacting protein 1 /// similar to poly(A) binding protein interacting protein 1
1419636_at	13	120.582	13	117.826	118.132	18.5578	22.9837	4833420G17Rik	RIKEN cDNA 4833420G17 gene
1419637_s_at	13	120.582	13	117.826	118.132	31.4015	26.2619	4833420G17Rik	RIKEN cDNA 4833420G17 gene
1419635_at	13	120.582	13	117.826	118.132	30.8817	35.2186	4833420G17Rik	RIKEN cDNA 4833420G17 gene
1430220_at	13	120.582	13	113.555	118.132	4.56379	5.91623	4833420G17Rik	RIKEN cDNA 4833420G17 gene
1451253_at	14	6.89019	14	4.3077	4.3077	18.0268	22.7055	Pxk	PX domain containing serine/threonine kinase
1448214_at	14	6.9566	14	4.3077	4.247	16.4523	14.9596	Pdhb /// LOC620009	pyruvate dehydrogenase (lipoamide) beta /// similar to pyruvate dehydrogenase (lipoamide) beta
1436388_a_at	14	11.0908	14	18.8446	4.3077	3.52506	8.28195	3830406C13Rik	RIKEN cDNA 3830406C13 gene
1423696_a_at	14	12.9054	14	14.3203	12.6587	41.459	53.5042	Psmd6	proteasome (prosome, macropain) 26S subunit, non-ATPase, 6
1419712_at	14	13.1403	14	4.7521	14.3203	16.683	17.6696	Il3ra	interleukin 3 receptor, alpha chain
1457528_at	14	13.5598	14	12.6587	4.3077	5.12071	5.57443	Slc4a7	solute carrier family 4, sodium bicarbonate cotransporter, member 7
1455876_at	14	13.5601	14	10.247	4.247	6.90973	3.5061	Slc4a7	solute carrier family 4, sodium bicarbonate cotransporter, member 7
1438673_at	14	13.5904	14	12.6587	12.6587	10.1313	4.06522	---	---
1429699_at	14	15.0339	14	4.247	14.3203	3.30697	8.55378	Oxsm	3-oxoacyl-ACP synthase, mitochondrial
1434328_at	14	17.0609	14	14.3203	9.6812	22.4477	22.6094	Rpl15	ribosomal protein L15
1424358_at	14	17.3664	14	4.247	20.6543	3.64412	5.76882	Ube2e2	ubiquitin-conjugating enzyme E2E 2 (UBC4/5 homolog, yeast)
1422126_a_at	14	19.0833	14	15.5834	15.9102	4.18031	4.4009	Nudt13	nudix (nucleoside diphosphate linked moiety X)-type motif 13
1460202_at	14	19.4372	14	15.5834	24.0113	3.3613	6.46429	Myoz1	myozenin 1
1431066_at	14	19.4835	14	15.5834	15.3707	6.94128	12.3126	Fut11	fucosyltransferase 11
1434123_at	14	19.4887	14	22.9669	15.3707	5.95533	5.83251	Fut11	fucosyltransferase 11
1458408_at	14	20.5836	14	15.3707	15.9102	4.82707	9.08262	Samd8	sterile alpha motif domain containing 8
1423835_at	14	20.7725	14	24.0113	24.0113	4.60698	5.60688	Zfp503	zinc finger protein 503
1430886_at	14	20.8083	14	16.8731	15.5834	6.43185	5.27288	1700112E06Rik	RIKEN cDNA 1700112E06 gene
1430887_s_at	14	20.8083	14	15.5834	18.8446	3.77909	6.15944	1700112E06Rik	RIKEN cDNA 1700112E06 gene
1432946_at	14	21.1897	14	16.8731	16.8731	9.75829	5.9248	5230400M06Rik	RIKEN cDNA 5230400M06 gene
1431988_at	14	21.3663	14	16.8731	15.3707	10.3893	18.1747	1700112E06Rik	RIKEN cDNA 1700112E06 gene
1428432_at	14	24.5448	14	18.8446	24.5761	6.74712	3.54077	2310047A01Rik	RIKEN cDNA 2310047A01 gene
1428431_at	14	24.5448	14	16.8731	24.5761	6.60228	7.4196	2310047A01Rik	RIKEN cDNA 2310047A01 gene
1436605_at	14	29.403	14	18.8446	24.5761	4.23431	7.27552	Tkt	transketolase
1429749_at	14	29.6506	14	32.247	24.5761	11.812	17.8823	9330180L21Rik	RIKEN cDNA 9330180L21 gene
1435582_at	14	31.7887	14	32.247	29.2552	7.96519	9.47631	Wdfy4	WD repeat and FYVE domain containing 4
1434778_at	14	33.576	14	36.9853	30.6777	3.29865	10.6478	---	Transcribed locus
1429692_s_at	14	46.0758	14	42.8171	38.7364	3.48894	6.5967	Gch1	GTP cyclohydrolase 1
1433879_a_at	14	46.2201	14	38.7364	38.7364	29.411	44.9	C130032J12Rik	RIKEN cDNA C130032J12 gene
1418693_at	14	50.9953	14	42.8171	38.7364	3.14758	6.36252	Hnrpc /// LOC620883 /// LOC676606	heterogeneous nuclear ribonucleoprotein C /// similar to heterogeneous nuclear ribonucleoprotein C /// similar to heterogeneous nuclear ribonucleoprotein C
1421144_at	14	51.0329	14	44.496	44.496	32.3098	26.2529	Rpgrip1	retinitis pigmentosa GTPase regulator interacting protein 1
1456449_at	14	51.1169	14	36.4919	42.2129	4.83872	5.0222	Supt16h	Suppressor of Ty 16 homolog (S. cerevisiae)
1428115_a_at	14	51.1837	14	40.247	44.8931	14.9397	17.7022	Rab2b	RAB2B, member RAS oncogene family
1419113_at	14	54.0526	14	52.4575	42.2129	3.86363	3.39924	Ap1g2	adaptor protein complex AP-1, gamma 2 subunit
1451039_at	14	54.6998	14	52.4575	54.7302	7.49255	15.2757	2610027L16Rik	RIKEN cDNA 2610027L16 gene
1418386_at	14	56.5037	14	50.247	52.1923	5.68088	9.9256	2510005D08Rik	RIKEN cDNA 2510005D08 gene
1449072_a_at	14	56.5037	14	44.496	52.1923	6.85364	10.8286	2510005D08Rik	RIKEN cDNA 2510005D08 gene
1435270_x_at	14	56.5037	14	52.1923	54.1244	9.43835	12.5069	2510005D08Rik	RIKEN cDNA 2510005D08 gene
1439441_x_at	14	56.6438	14	52.4575	52.4575	5.52793	3.74949	Lats2	large tumor suppressor 2
1425420_s_at	14	56.6764	14	50.247	52.1923	6.38715	7.76794	Lats2	large tumor suppressor 2
1434236_at	14	56.7869	14	50.247	54.7302	10.4562	6.21036	Zdhhc20	zinc finger, DHHC domain containing 20
1449966_s_at	14	58.3951	14	54.1244	56.4945	9.71959	10.4368	Cab39l	calcium binding protein 39-like
1426367_at	14	58.4132	14	64.247	56.4945	7.54618	12.9906	Cab39l	calcium binding protein 39-like
1455073_at	14	58.518	14	54.1244	44.496	4.58168	3.07156	Cdadc1	cytidine and dCMP deaminase domain containing 1
1451726_at	14	59.2193	14	40.247	44.8931	5.80956	13.9088	Mtmr6	myotubularin related protein 6
1429723_at	14	60.488	14	52.7524	56.4945	5.20284	9.2602	6330409N04Rik	RIKEN cDNA 6330409N04 gene
1453001_at	14	61.2862	14	52.4575	56.4945	3.67383	3.29517	Dleu8	deleted in lymphocytic leukemia 8
1434517_at	14	61.9146	14	54.1244	54.1244	9.01807	10.416	Wdfy2	WD repeat and FYVE domain containing 2
1436896_at	14	63.9864	14	57.4943	60.21	7.78268	6.27785	D14Ertd231e	DNA segment, Chr 14, ERATO Doi 231, expressed
1421339_at	14	64.0079	14	56.4945	56.4945	7.64429	20.8464	Extl3	exostoses (multiple)-like 3
1434764_at	14	77.2264	14	70.3318	70.3318	12.3981	12.8797	Akap11	A kinase (PRKA) anchor protein 11
1424904_at	14	77.5833	14	71.0175	70.7432	12.7676	19.0745	1300010F03Rik	RIKEN cDNA 1300010F03 gene
1455376_at	14	77.9325	14	68.247	70.7432	9.90381	8.49666	1300010F03Rik	RIKEN cDNA 1300010F03 gene
1429057_at	14	78.0698	14	70.7432	70.7432	3.8165	3.24699	Narg1l	NMDA receptor regulated 1-like
1426803_at	14	103.992	14	98.247	97.0363	11.6899	7.89356	Rbm26	RNA binding motif protein 26
1436858_at	14	119.411	14	112.827	108.429	3.09913	4.08006	Mbnl2	muscleblind-like 2
1458376_at	14	119.476	14	114.481	113.801	6.32608	6.62546	B930025B16Rik	RIKEN cDNA B930025B16 gene
1421014_a_at	14	121.317	14	115.74	117.341	8.95968	13.0234	Clybl	citrate lyase beta like
1427121_at	15	3.91546	15	3.6365	3.6365	9.32708	6.8142	Fbxo4	F-box only protein 4
1436395_at	15	5.04466	15	3.6365	3.6365	24.7362	18.406	Card6	caspase recruitment domain family, member 6
1449200_at	15	8.05649	15	8.7323	3.6365	11.1839	17.2535	Nup155	nucleoporin 155
1429891_at	15	9.38075	15	9.6864	9.6864	12.6815	22.2056	Capsl	calcyphosine-like
1428013_at	15	12.7659	15	11.6365	9.6864	9.21528	4.85939	6030458C11Rik	RIKEN cDNA 6030458C11 gene
1422544_at	15	25.5672	15	33.7045	25.8686	7.12324	7.61034	Myo10	myosin X
1450650_at	15	25.5672	15	33.7045	25.8686	8.41204	12.467	Myo10	myosin X
1454731_at	15	25.7576	15	33.7045	25.8686	6.53988	8.41592	Myo10	myosin X
1428683_at	15	31.548	15	29.8823	49.7008	3.69394	4.00404	A930016P21Rik	RIKEN cDNA A930016P21 gene
1416441_at	15	33.0277	15	33.7045	26.644	3.96886	3.81465	Pgcp	plasma glutamate carboxypeptidase
1434884_at	15	34.0279	15	32.1776	34.7429	8.61893	7.07768	Mtdh	Metadherin
1434571_at	15	35.8617	15	38.3854	34.7429	7.02419	6.82654	Vps13b /// LOC666173 /// LOC669978	vacuolar protein sorting 13B (yeast) /// similar to vacuolar protein sorting 13B isoform 4 /// region containing RIKEN cDNA C330002D13 gene; RIKEN cDNA 2310042E16 gene; vacuolar protein sorting 13B (yeast)
1456177_x_at	15	36.9436	15	38.3854	49.7008	3.11085	5.98054	Zfp706	zinc finger protein 706
1431970_at	15	39.576	15	40.4551	34.7429	3.00496	3.02935	Tm7sf4	transmembrane 7 superfamily member 4
1459032_at	15	39.6991	15	40.4551	40.4551	14.9791	24.3232	---	Transcribed locus
1429410_at	15	44.2582	15	40.4551	26.644	3.52347	3.77044	Eny2	enhancer of yellow 2 homolog (Drosophila)
1417730_at	15	52.8983	15	55.4641	64.1144	14.5239	8.03201	Ext1	exostoses (multiple) 1
1452215_at	15	57.8523	15	57.6365	58.6399	16.9583	10.5909	9130401M01Rik	RIKEN cDNA 9130401M01 gene
1435059_at	15	63.9165	15	75.6365	66.4388	11.1191	12.5346	Ddef1	development and differentiation enhancing
1425572_a_at	15	63.9183	15	77.6365	66.4388	8.10639	7.47348	Ddef1	development and differentiation enhancing
1455389_s_at	15	72.925	15	64.4788	73.8007	6.68231	7.48735	2310051F07Rik	RIKEN cDNA 2310051F07 gene
1423059_at	15	73.0324	15	64.4788	73.8007	7.98145	5.86443	Ptk2	PTK2 protein tyrosine kinase 2
1459678_at	15	73.2509	15	83.6365	73.8007	5.86173	8.14548	LOC497255	hypothetical LOC497255
1433559_at	15	73.4071	15	84.4364	66.4388	6.21708	3.50899	Slc45a4	solute carrier family 45, member 4
1434299_x_at	15	77.9867	15	84.4364	89.9716	3.46852	3.67567	Rabl4	RAB, member of RAS oncogene family-like 4
1418465_at	15	78.0721	15	85.7471	71.7046	8.63608	11.2213	Ncf4	neutrophil cytosolic factor 4
1434661_at	15	79.9454	15	84.4364	97.5573	4.01159	3.82127	Syngr1	synaptogyrin 1
1434145_s_at	15	82.944	15	81.851	87.4998	12.8653	20.2885	Serhl	serine hydrolase-like
1455788_x_at	15	82.9537	15	64.4788	72.3271	4.51895	6.54345	Poldip3	Polymerase (DNA-directed), delta interacting protein 3
1452709_at	15	82.9537	15	83.6365	87.4998	13.6935	16.7434	Poldip3	polymerase (DNA-directed), delta interacting protein 3
1422186_s_at	15	82.9813	15	84.4364	81.851	6.92366	9.52909	Cyb5r3	cytochrome b5 reductase 3
1416695_at	15	83.3917	15	83.6365	81.851	7.62379	11.3368	Tspo	translocator protein
1456251_x_at	15	83.4017	15	83.6365	88.2498	6.87039	6.91038	Tspo	translocator protein
1438948_x_at	15	83.4017	15	84.4364	81.851	3.05803	5.21079	Tspo	translocator protein
1416876_at	15	84.1525	15	89.6365	88.2498	8.35377	10.0835	Parvg	parvin, gamma
1416875_at	15	84.1525	15	71.7046	88.2498	8.36295	10.6425	Parvg	parvin, gamma
1435745_at	15	84.7717	15	83.6365	94.6862	7.71211	6.60446	5031439G07Rik	RIKEN cDNA 5031439G07 gene
1454786_at	15	84.7753	15	84.4364	94.6862	7.58737	4.67979	5031439G07Rik	RIKEN cDNA 5031439G07 gene
1460346_at	15	89.3002	15	88.2498	89.9716	11.7562	11.0501	Arsa	arylsulfatase A
1431931_a_at	15	89.4103	15	93.1415	89.9716	5.09493	10.3874	Rabl2a	RAB, member of RAS oncogene family-like 2A
1431146_a_at	15	90.3152	15	95.3587	95.3587	7.55284	9.93054	Cpne8	copine VIII
1451319_at	15	97.8692	15	97.5573	99.8141	8.66736	5.4018	Senp1	SUMO1/sentrin specific peptidase 1
1435550_at	15	98.6597	15	99.8141	99.8141	3.28141	4.04986	C430014K11Rik	RIKEN cDNA C430014K11 gene
1428786_at	15	103.307	15	99.8141	95.3587	8.81958	4.79833	Nckap1l	NCK associated protein 1 like
1428149_at	16	4.54136	16	5.2772	5.2772	4.21524	8.9169	Coro7	coronin 7
1441848_at	16	8.56286	16	5.1426	13.6437	8.40744	11.0853	Pmm2	Phosphomannomutase 2
1438249_at	16	8.61142	16	7.4456	8.3429	6.95726	4.63859	Usp7	Ubiquitin specific peptidase 7
1429165_at	16	13.5855	16	13.6437	14.3225	13.0225	20.5657	3110001I22Rik	RIKEN cDNA 3110001I22 gene
1415725_at	16	13.7272	16	11.0263	5.2772	7.60206	7.35498	Rrn3	RRN3 RNA polymerase I transcription factor homolog (yeast)
1428200_a_at	16	13.7467	16	13.1426	14.6518	31.7366	32.3807	2210010A19Rik	RIKEN cDNA 2210010A19 gene
1452705_at	16	13.7467	16	21.1426	14.6518	43.5254	48.0429	2210010A19Rik	RIKEN cDNA 2210010A19 gene
1436372_a_at	16	13.747	16	13.2418	12.8308	24.1541	4.01101	2210010A19Rik	RIKEN cDNA 2210010A19 gene
1419327_at	16	13.7492	16	17.1426	14.6518	54.4158	60.765	2210010A19Rik	RIKEN cDNA 2210010A19 gene
1449413_at	16	13.8543	16	11.0263	7.6455	3.20954	4.86571	Mpv17l	Mpv17 transgene, kidney disease mutant-like
1418701_at	16	18.3204	16	19.4885	13.6437	20.7809	14.3365	Comt	catechol-O-methyltransferase
1425134_a_at	16	32.0042	16	31.3297	31.0328	26.2392	23.2719	Pigx	phosphatidylinositol glycan anchor biosynthesis, class X
1422967_a_at	16	32.5287	16	34.1425	44.948	3.9876	3.37618	Tfrc	transferrin receptor
1452661_at	16	32.5483	16	30.5016	44.948	3.40676	4.18137	Tfrc	transferrin receptor
1448297_a_at	16	32.5645	16	32.0978	32.3866	18.6135	22.727	Tnk2 /// LOC672286	tyrosine kinase, non-receptor, 2 /// similar to Activated CDC42 kinase 1 (ACK-1) (Non-receptor protein tyrosine kinase Ack) (Tyrosine kinase non-receptor protein 2)
1432548_at	16	35.7858	16	41.9945	35.9397	8.35801	9.79063	Parp14	poly (ADP-ribose) polymerase family, member 14
1449503_at	16	35.9031	16	30.3524	40.9389	4.58045	11.5135	Kpna1	karyopherin (importin) alpha 1
1420404_at	16	36.5231	16	35.9397	35.9397	7.22505	5.64433	Cd86	CD86 antigen
1449858_at	16	36.5231	16	35.9397	32.3866	5.88897	6.1055	Cd86	CD86 antigen
1432826_a_at	16	38.4129	16	38.7827	34.1425	7.20315	10.7624	Cd80	CD80 antigen
1420329_at	16	38.4172	16	44.948	40.771	15.6964	12.247	4930455C21Rik	RIKEN cDNA 4930455C21 gene
1426535_at	16	38.4442	16	38.7827	32.0978	11.7212	9.91398	9630046K23Rik	RIKEN cDNA 9630046K23 gene
1435313_at	16	44.7579	16	44.948	44.948	24.8759	27.2844	Cd200r4	Cd200 receptor 4
1429555_at	16	58.6705	16	46.0136	58.4303	6.67124	6.9765	Cldnd1	claudin domain containing 1
1431293_a_at	16	58.6717	16	59.8742	59.8742	10.8935	13.9294	Cldnd1	claudin domain containing 1
1423595_at	16	59.414	16	53.1426	59.8742	6.54327	11.4275	Mina	myc induced nuclear antigen
1451042_a_at	16	59.414	16	56.8987	59.8742	14.4807	19.7822	Mina	myc induced nuclear antigen
1434410_at	16	59.4343	16	59.8742	59.8742	10.5737	9.79133	BC043118	cDNA sequence BC043118
1436334_at	16	90.5046	16	91.8277	91.8277	28.728	15.67	Synj1	synaptojanin 1
1436333_a_at	16	90.5046	16	93.1426	91.673	29.2234	20.8686	Synj1	synaptojanin 1
1418008_at	16	90.902	16	95.1426	91.8277	6.04138	3.63367	1810007M14Rik	RIKEN cDNA 1810007M14 gene
1419455_at	16	91.2953	16	89.2791	89.2791	5.9189	7.06896	Il10rb	interleukin 10 receptor, beta
1423707_at	16	91.4634	16	87.0456	89.2791	3.85239	3.61999	Tmem50b	transmembrane protein 50B
1420543_at	16	91.5031	16	87.0456	87.0116	3.23229	4.05402	ORF28	open reading frame 28
1420542_at	16	91.5031	16	87.0456	87.0116	3.24246	6.53742	ORF28	open reading frame 28
1438871_at	16	91.5576	16	91.8277	83.8464	4.01663	7.77057	Son	Son cell proliferation protein
1426739_at	16	91.5679	16	73.1426	91.8277	3.11406	3.02859	Donson	downstream neighbor of SON
1422864_at	16	92.4918	16	91.1426	96.7997	7.50039	12.1878	Runx1	runt related transcription factor 1
1427912_at	16	93.5718	16	88.2361	96.7997	3.69823	6.83082	Cbr3	carbonyl reductase 3
1436038_a_at	16	94.4732	16	96.7997	96.7997	8.66625	8.2563	Pigp	phosphatidylinositol glycan anchor biosynthesis, class P
1416268_at	16	95.8112	16	96.7997	96.7997	3.80302	3.96988	Ets2	E26 avian leukemia oncogene 2, 3' domain
1455459_at	16	97.9464	16	96.7997	96.7997	4.98128	4.58079	Prdm15	PR domain containing 15
1424045_at	17	5.36756	17	5.4484	6.5761	6.25512	9.77484	5730437N04Rik	RIKEN cDNA 5730437N04 gene
1450850_at	17	6.5877	17	10.3428	9.2084	5.98365	3.16033	Vil2	villin 2
1460453_at	17	6.80462	17	9.5509	4.9855	9.67823	8.66165	Tagap	T-cell activation Rho GTPase-activating protein
1449541_x_at	17	8.82653	17	8.4728	8.4728	3.12971	3.8087	1700010I14Rik	RIKEN cDNA 1700010I14 gene
1459800_s_at	17	12.071	17	28.4175	29.9379	4.59207	6.5918	Map3k4	mitogen activated protein kinase kinase kinase 4
1440992_at	17	21.279	17	18.8606	29.9379	5.16504	3.51636	3110052M02Rik	RIKEN cDNA 3110052M02 gene
1438349_at	17	21.4531	17	11.5791	17.995	3.36549	7.07911	BC043476	cDNA sequence BC043476
1444589_at	17	21.9032	17	18.8606	22.3916	21.3059	28.7294	LOC240038	similar to reduced expression 2
1435984_at	17	22.9105	17	16.8606	24.8256	10.944	10.551	1110033F14Rik	RIKEN cDNA 1110033F14 gene
1420352_at	17	23.7212	17	24.2219	21.0877	11.039	15.0742	Prss22	protease, serine, 22
1456042_s_at	17	24.6888	17	42.8611	28.4175	4.03079	4.45511	Cramp1l	Crm, cramped-like (Drosophila)
1452702_at	17	24.8884	17	24.8256	24.6872	7.95056	9.21717	Clcn7	chloride channel 7
1418344_at	17	25.8409	17	24.2219	36.0476	5.95254	3.60893	Tmem8	transmembrane protein 8 (five membrane-spanning domains)
1460377_a_at	17	25.8442	17	24.2219	36.0476	4.44351	3.17	Tmem8	transmembrane protein 8 (five membrane-spanning domains)
1435872_at	17	29.2227	17	29.9379	28.4175	33.4972	20.6528	---	Transcribed locus
1419766_at	17	31.573	17	32.8606	36.0476	3.80743	5.55658	Snf1lk	SNF1-like kinase
1433669_at	17	32.0353	17	42.4476	29.9379	8.63213	12.9873	Akap8	A kinase (PRKA) anchor protein 8
1435163_at	17	32.5114	17	33.9831	29.9379	28.4375	19.5425	9030612M13Rik	RIKEN cDNA 9030612M13 gene
1418767_at	17	32.6631	17	34.3412	32.541	7.42947	11.5691	Cyp4f13	cytochrome P450, family 4, subfamily f, polypeptide 13
1434675_at	17	32.7554	17	36.2339	32.541	6.12359	3.06822	1700065O13Rik	RIKEN cDNA 1700065O13 gene
1444076_at	17	32.9455	17	31.0812	29.9379	5.04058	8.77761	Zfp81	zinc finger protein 81
1429524_at	17	33.2078	17	36.2339	31.5938	20.7715	21.731	Myo1f	myosin IF
1448839_at	17	33.4166	17	31.0812	33.8278	3.29467	4.75349	Ankrd47	ankyrin repeat domain 47
1421812_at	17	33.5298	17	28.4175	40.1579	3.59795	4.01788	Tapbp	TAP binding protein
1450534_x_at	17	33.5851	17	32.8606	33.9831	16.9817	4.70322	LOC56628	MHC (A.CA/J(H-2K-f) class I antigen
1424948_x_at	17	33.6065	17	29.9379	36.0476	7.12242	7.42563	H2-D1 /// H2-K1 /// LOC56628	histocompatibility 2, D region locus 1 /// histocompatibility 2, K1, K region /// MHC (A.CA/J(H-2K-f) class I antigen
1425336_x_at	17	33.6065	17	33.9831	33.9831	27.153	47.7328	H2-K1	histocompatibility 2, K1, K region
1425614_x_at	17	33.6066	17	33.9831	33.9831	33.1317	53.5825	H2-D1	histocompatibility 2, D region locus 1
1452544_x_at	17	33.6067	17	33.9831	33.9831	34.7832	55.6636	H2-D1	histocompatibility 2, D region locus 1
1427746_x_at	17	33.6069	17	29.9379	36.0476	9.96456	29.8294	H2-K1	histocompatibility 2, K1, K region
1423502_at	17	33.7225	17	28.4175	29.9379	3.72897	4.18335	Brd2	bromodomain containing 2
1422527_at	17	33.7461	17	32.8606	33.9831	17.4211	20.278	H2-DMa	histocompatibility 2, class II, locus DMa
1418638_at	17	33.7558	17	33.9831	36.6304	31.563	38.3774	H2-DMb1	histocompatibility 2, class II, locus Mb1
1449580_s_at	17	33.7559	17	33.9831	33.9831	36.0447	39.3755	H2-DMb1 /// H2-DMb2	histocompatibility 2, class II, locus Mb1 /// histocompatibility 2, class II, locus Mb2
1422892_s_at	17	33.9496	17	34.3412	28.4175	6.35016	8.14249	H2-Ea	histocompatibility 2, class II antigen E alpha
1417173_at	17	34.2552	17	33.9831	36.0476	6.68166	10.3599	Crebl1	cAMP responsive element binding protein-like 1
1430771_a_at	17	34.6465	17	36.2339	36.0476	9.20895	6.94595	Msh5	mutS homolog 5 (E. coli)
1425545_x_at	17	34.8711	17	33.9831	33.9831	35.0956	59.1918	H2-D1	histocompatibility 2, D region locus 1
1450170_x_at	17	34.8711	17	36.2339	34.6818	52.7388	55.5547	H2-K1	Histocompatibility 2, K1, K region
1426324_at	17	34.8712	17	32.698	33.9831	17.7425	37.6956	H2-D1	histocompatibility 2, D region locus 1
1451784_x_at	17	34.8712	17	33.9831	33.9831	38.6219	54.9872	H2-D1 /// H2-L /// LOC547343 /// LOC636948	histocompatibility 2, D region locus 1 /// histocompatibility 2, D region /// similar to H-2 class I histocompatibility antigen, L-D alpha chain precursor /// similar to H-2 class I histocompatibility antigen, D-B alpha chain precursor (H-2D(B))
1451683_x_at	17	34.8712	17	32.8606	33.9831	33.9258	29.6904	LOC547343	similar to H-2 class I histocompatibility antigen, L-D alpha chain precursor
1451931_x_at	17	34.8712	17	33.9831	33.9831	40.8542	50.6821	H2-L	histocompatibility 2, D region
1427651_x_at	17	34.8716	17	33.9831	33.9831	36.3792	54.1402	H2-D1	histocompatibility 2, D region locus 1
1418536_at	17	35.0472	17	33.9831	33.9831	10.4923	11.658	LOC630509 /// LOC674192	similar to H-2 class I histocompatibility antigen, Q7 alpha chain precursor (QA-2 antigen) /// region containing histocompatibility 2, Q region locus 9; histocompatibility 2, Q region locus 7
1431299_a_at	17	35.4767	17	36.2339	34.3412	13.12	4.47656	2310014H01Rik	RIKEN cDNA 2310014H01 gene
1449021_at	17	35.8637	17	36.2339	33.8278	5.50298	9.91003	Rpp21	ribonuclease P 21 subunit (human)
1448565_at	17	36.5564	17	28.4175	42.8611	7.51242	8.75378	Ppp1r11	protein phosphatase 1, regulatory (inhibitor) subunit 11
1421358_at	17	36.8783	17	33.9831	42.8611	16.3335	18.1586	H2-M3	histocompatibility 2, M region locus 3
1416839_at	17	40.3982	17	36.2339	42.4476	7.34483	10.9428	Mut	methylmalonyl-Coenzyme A mutase
1448486_at	17	40.3982	17	44.8606	40.1579	28.4608	31.411	Mut	methylmalonyl-Coenzyme A mutase
1422740_at	17	42.48	17	36.2339	36.2339	3.37719	5.18208	Tnfrsf21	tumor necrosis factor receptor superfamily, member 21
1440193_at	17	65.8866	17	50.8606	55.4148	3.74847	3.23727	Ankrd12	ankyrin repeat domain 12
1435264_at	17	71.157	17	67.0026	71.4148	5.84753	7.30946	Emilin2	elastin microfibril interfacer 2
1437481_at	17	71.4934	17	71.4148	71.9218	15.3472	10.1904	LOC623451	hypothetical LOC623451
1451629_at	17	72.8233	17	68.6664	74.7811	4.04469	8.31669	Lbh	limb-bud and heart
1451006_at	17	73.7888	17	74.7811	74.7811	10.0956	11.8488	Xdh	xanthine dehydrogenase
1439815_at	17	78.658	17	65.7451	79.5507	3.11106	6.09465	A230048G03Rik /// LOC670614	RIKEN cDNA A230048G03 gene /// similar to CG2747-PB, isoform B
1428230_at	17	78.8545	17	71.9218	69.6888	3.46678	4.10273	Prkcn	protein kinase C, nu
1416794_at	17	79.7574	17	81.9354	79.5507	3.87196	5.05073	Arl6ip2	ADP-ribosylation factor-like 6 interacting protein 2
1427144_at	17	79.938	17	80.8606	82.084	9.84969	16.0314	Hnrpll	heterogeneous nuclear ribonucleoprotein L-like
1454800_at	17	80.1985	17	79.2352	81.9354	18.4158	22.8543	Morn2	MORN repeat containing 2
1426759_at	17	80.4888	17	80.1869	81.9354	13.7555	16.4903	Map4k3 /// LOC675560	mitogen-activated protein kinase kinase kinase kinase 3 /// similar to mitogen-activated protein kinase kinase kinase kinase 3
1428726_at	17	80.9346	17	79.2352	82.084	4.56962	4.4945	Thumpd2	THUMP domain containing 2
1437675_at	17	81.291	17	80.7494	79.2352	8.81712	10.1477	Slc8a1	solute carrier family 8 (sodium/calcium exchanger), member 1
1460411_s_at	17	83.1242	17	81.9354	83.7832	19.4165	18.0037	AW548124	expressed sequence AW548124
1454838_s_at	17	83.1331	17	82.084	83.7832	12.8704	13.4697	AW548124	expressed sequence AW548124
1443884_at	17	84.0984	17	87.74	85.2001	19.6766	25.1223	Thada	thyroid adenoma associated
1428446_at	17	84.5348	17	87.74	85.2001	6.33795	9.70745	Dync2li1	dynein cytoplasmic 2 light intermediate chain 1
1424353_at	17	84.6136	17	87.74	84.95	7.25285	11.8614	Lrpprc	leucine-rich PPR-motif containing
1435617_at	17	85.0377	17	85.4843	87.74	7.10257	10.2476	AI480743	expressed sequence AI480743
1423487_at	17	86.9339	17	89.5702	87.74	11.152	13.6185	Cript	cysteine-rich PDZ-binding protein
1424024_at	17	87.1628	17	79.2352	74.7811	6.10343	3.76628	Mcfd2	multiple coagulation factor deficiency 2
1418427_at	18	6.20101	18	9.3652	9.3652	19.607	4.36782	Kif5b	kinesin family member 5B
1418429_at	18	6.20101	18	7.1606	12.0022	29.1578	26.7564	Kif5b	kinesin family member 5B
1455179_at	18	7.34796	18	12.0022	6.5982	18.1148	26.607	Mpp7	membrane protein, palmitoylated 7 (MAGUK p55 subfamily member 7)
1432216_s_at	18	7.40332	18	6.5982	7.3073	10.3855	12.8736	Mpp7	membrane protein, palmitoylated 7 (MAGUK p55 subfamily member 7)
1454158_at	18	7.40332	18	14.1776	5.1793	11.204	21.8363	Mpp7	membrane protein, palmitoylated 7 (MAGUK p55 subfamily member 7)
1419693_at	18	9.70764	18	5.1793	5.1793	3.57264	3.42157	Colec12	collectin sub-family member 12
1419981_at	18	12.2997	18	15.5155	7.3073	6.42456	6.60801	Riok3	RIO kinase 3 (yeast)
1423086_at	18	12.3332	18	15.5155	5.1793	13.5703	25.207	Npc1	Niemann Pick type C1
1423236_at	18	24.3492	18	37.6443	37.6443	4.79683	3.92663	Galnt1	UDP-N-acetyl-alpha-D-galactosamine:polypeptide N-acetylgalactosaminyltransferase 1
1418134_at	18	31.7246	18	28.016	30.6375	9.22206	5.86483	1200007B05Rik	RIKEN cDNA 1200007B05 gene
1420798_s_at	18	37.0563	18	30.6375	36.574	5.51842	7.42536	Pcdha4 /// Pcdha6 /// Pcdha7 /// Pcdha5 /// Pcdha11 /// Pcdha10 /// Pcdha1 /// Pcdha9 /// Pcdha3 /// Pcdha12 /// Pcdha2 /// Pcdha8 /// Pcdhac1 /// Pcdhac2	protocadherin alpha 4 /// protocadherin alpha 6 /// protocadherin alpha 7 /// protocadherin alpha 5 /// protocadherin alpha 11 /// protocadherin alpha 10 /// protocadherin alpha 1 /// protocadherin alpha 9 /// protocadherin alpha 3 /// protocadherin alpha 12 /// protocadherin alpha 2 /// protocadherin alpha 8 /// protocadherin alpha subfamily C, 1 /// protocadherin alpha subfamily C, 2
1428491_at	18	47.2116	18	49.1319	49.1319	7.7559	8.51823	Commd10	COMM domain containing 10
1434023_at	18	53.8071	18	55.1793	46.5013	14.4955	5.96289	AU016693	expressed sequence AU016693
1429384_at	18	54.0423	18	50.5598	43.0677	6.09962	4.42347	Csnk1g3	casein kinase 1, gamma 3
1424058_at	18	57.4801	18	53.711	56.0812	9.51559	4.88243	1190002C06Rik	RIKEN cDNA 1190002C06 gene
1417622_at	18	58.004	18	66.2904	75.8591	4.56158	4.91587	Slc12a2	solute carrier family 12, member 2
1425053_at	18	58.7849	18	50.5598	58.7096	5.28668	4.19449	Isoc1	isochorismatase domain containing 1
1425051_at	18	58.7849	18	50.5598	61.7035	3.83319	6.53858	Isoc1	isochorismatase domain containing 1
1425052_at	18	58.7849	18	58.7096	64.2212	3.7452	6.78675	---	CDNA, clone:Y2G0147N17, strand:unspecified
1423600_a_at	18	60.9399	18	58.7096	61.7035	6.53705	6.68479	Tcof1	Treacher Collins Franceschetti syndrome 1, homolog
1418044_at	18	61.2566	18	57.7743	61.7035	10.0284	8.34092	A630042L21Rik	RIKEN cDNA A630042L21 gene
1440341_at	18	61.2994	18	62.8996	75.7315	5.83334	4.56599	LOC629345	similar to SMF protein
1427195_at	18	61.3183	18	79.1793	73.117	3.82996	3.71146	---	Mus musculus, clone IMAGE:3983419, mRNA
1421145_at	18	61.3222	18	50.5598	57.091	5.62917	11.1627	Slc26a2	solute carrier family 26 (sulfate transporter), member 2
1437923_at	18	61.7088	18	63.589	66.2904	3.46745	4.14513	AI314760	expressed sequence AI314760
1437302_at	18	62.303	18	61.7035	62.8996	7.295	7.92265	Adrb2	adrenergic receptor, beta 2
1449181_at	18	64.5819	18	65.6032	65.6601	17.7275	18.0226	Fech	ferrochelatase
1428666_at	18	64.625	18	49.1319	57.091	5.57968	3.46541	Nars	asparaginyl-tRNA synthetase
1452866_at	18	64.625	18	50.5598	64.2212	13.8566	11.0601	Nars	asparaginyl-tRNA synthetase
1444037_at	18	66.1259	18	65.6601	66.2904	17.4352	13.8994	Lman1	lectin, mannose-binding, 1
1454612_at	18	73.6988	18	76.6184	77.0076	3.40602	7.97015	Rkhd2	ring finger and KH domain containing 2
1422485_at	18	73.7638	18	73.6695	75.0887	26.1327	33.8758	Smad4	MAD homolog 4 (Drosophila)
1419228_at	18	73.8629	18	73.6695	75.8591	4.15631	11.5046	Elac1	elaC homolog 1 (E. coli)
1421417_s_at	18	73.8635	18	73.6695	75.8591	4.38351	7.54936	Elac1	elaC homolog 1 (E. coli)
1439526_at	18	73.8903	18	73.6695	75.8591	5.66878	7.22051	---	Adult male cecum cDNA, RIKEN full-length enriched library, clone:9130022D06 product:unclassifiable, full insert sequence
1437061_at	18	74.4039	18	76.875	73.6695	7.08381	9.86877	Mbd1	methyl-CpG binding domain protein 1
1428145_at	18	74.9043	18	76.875	75.8591	3.03047	3.74237	Acaa2	acetyl-Coenzyme A acyltransferase 2 (mitochondrial 3-oxoacyl-Coenzyme A thiolase)
1428146_s_at	18	74.9043	18	75.7315	75.7315	5.84919	10.0168	Acaa2	acetyl-Coenzyme A acyltransferase 2 (mitochondrial 3-oxoacyl-Coenzyme A thiolase)
1453752_at	18	75.1266	18	76.6184	75.8591	12.0852	22.6695	Rpl17	ribosomal protein L17
1415752_at	18	75.1312	18	76.6184	75.7315	8.76537	5.49173	BC031181	cDNA sequence BC031181
1442062_at	18	76.4348	18	80.7146	75.7315	4.80247	7.91333	7120426M23Rik	RIKEN cDNA 7120426M23 gene
1428507_at	18	77.1489	18	77.0076	77.0076	18.7929	17.4724	Hdhd2	haloacid dehalogenase-like hydrolase domain containing 2
1426262_at	18	80.2884	18	80.7146	80.7146	8.2788	5.15405	Zfp508	zinc finger protein 508
1428520_at	18	80.3543	18	80.7146	80.7146	16.0331	23.0601	1110032A13Rik	RIKEN cDNA 1110032A13 gene
1419179_at	18	80.3689	18	80.7146	80.7146	15.9807	5.96874	Txnl4	thioredoxin-like 4
1426567_a_at	18	80.4154	18	77.1793	79.5959	5.55731	8.00433	Pqlc1	PQ loop repeat containing 1
1452697_at	18	80.57	18	79.5959	80.7146	14.1494	19.16	Ctdp1	CTD (carboxy-terminal domain, RNA polymerase II, polypeptide A) phosphatase, subunit 1
1447084_at	18	80.8095	18	79.5959	77.0076	5.89568	4.55405	Nfatc1	nuclear factor of activated T-cells, cytoplasmic, calcineurin-dependent 1
1417621_at	18	80.8096	18	79.5959	80.7146	28.6671	21.4288	Nfatc1	nuclear factor of activated T-cells, cytoplasmic, calcineurin-dependent 1
1423768_at	19	3.93521	19	10.1904	12.1502	4.18358	3.08963	Unc93b1	unc-93 homolog B1 (C. elegans)
1424064_at	19	5.0992	19	4.1904	8.5982	4.94882	3.70718	Rab1b	RAB1B, member RAS oncogene family
1439156_at	19	5.56932	19	4.1904	8.5982	40.783	31.8443	Gm962	gene model 962, (NCBI)
1439453_x_at	19	5.60246	19	6.1904	18.574	9.4276	5.66556	1500026D16Rik	RIKEN cDNA 1500026D16 gene
1416012_at	19	6.27697	19	4.1904	8.5982	8.02829	16.3923	Ehd1	EH-domain containing 1
1428297_at	19	6.34149	19	6.1904	4.1904	21.8083	18.2006	Map4k2	mitogen activated protein kinase kinase kinase kinase 2
1418101_a_at	19	7.49294	19	8.5982	11.1528	5.7765	4.45226	Rtn3	reticulon 3
1454703_x_at	19	8.79121	19	9.2678	8.5982	18.2482	18.3483	Snord22	small nucleolar RNA, C/D box 22
1439399_a_at	19	8.79321	19	9.2678	8.5982	20.0136	21.0529	Snord22	small nucleolar RNA, C/D box 22
1416890_at	19	8.80286	19	4.1904	9.2678	6.78187	6.5228	Wdr74	WD repeat domain 74
1437615_s_at	19	10.7814	19	10.1904	9.2678	18.1574	31.6495	Vps37c	Vacuolar protein sorting 37C (yeast)
1460350_at	19	12.0511	19	11.7757	12.1502	16.1946	15.7823	Osbp	oxysterol binding protein
1416230_at	19	17.4608	19	17.5551	18.574	6.01104	5.58183	Rfk	riboflavin kinase
1429657_at	19	21.3393	19	22.1904	20.0046	9.38857	8.48159	Zfand5	zinc finger, AN1-type domain 5
1428289_at	19	23.2326	19	28.499	25.9407	3.55476	7.41285	Klf9	Kruppel-like factor 9
1428288_at	19	23.2326	19	29.1834	23.3117	4.12669	13.1653	Klf9	Kruppel-like factor 9
1426271_at	19	23.2735	19	23.3117	32.4748	3.28325	3.78061	Smc5	structural maintenance of chromosomes 5
1426270_at	19	23.2735	19	24.3859	26.7541	7.6153	7.66903	Smc5	structural maintenance of chromosomes 5
1434599_a_at	19	24.1617	19	23.7275	24.3859	23.0529	24.7957	Tjp2	tight junction protein 2
1434600_at	19	24.1617	19	24.3859	24.3859	21.9178	25.5072	Tjp2	tight junction protein 2
1450985_a_at	19	24.1617	19	23.7275	26.7541	27.5609	28.4116	Tjp2	tight junction protein 2
1417900_a_at	19	27.2845	19	20.4539	28.992	4.08003	5.78838	Vldlr	very low density lipoprotein receptor
1434465_x_at	19	27.3165	19	22.1904	29.1834	6.39133	6.16918	Vldlr	very low density lipoprotein receptor
1435893_at	19	27.3205	19	25.9407	29.1834	4.51887	3.04261	Vldlr	very low density lipoprotein receptor
1430205_a_at	19	29.0563	19	24.3859	28.992	7.8678	12.3087	Cdc37l1	cell division cycle 37 homolog (S. cerevisiae)-like 1
1417740_at	19	29.0564	19	28.499	29.1834	14.0694	23.564	Cdc37l1	cell division cycle 37 homolog (S. cerevisiae)-like 1
1423718_at	19	29.0867	19	28.499	29.1834	6.52061	6.96574	Ak3	adenylate kinase 3
1423717_at	19	29.0867	19	28.499	28.992	14.1067	13.714	Ak3	adenylate kinase 3
1440886_at	19	29.0915	19	28.499	28.992	19.9933	15.1747	Cdc37l1	cell division cycle 37 homolog (S. cerevisiae)-like 1
1418346_at	19	29.3873	19	28.1904	28.992	13.7177	21.3173	Insl6	insulin-like 6
1442255_at	19	29.4213	19	28.499	32.4748	5.09512	6.50872	5033414D02Rik	RIKEN cDNA 5033414D02 gene
1434510_at	19	32.7317	19	38.1904	32.4748	4.23408	8.52947	Papss2	3'-phosphoadenosine 5'-phosphosulfate synthase 2
1418473_at	19	43.8063	19	29.1834	48.3955	6.60763	10.7333	Cutc	cutC copper transporter homolog (E.coli)
1415824_at	19	44.3473	19	43.9266	48.3955	3.52433	4.92425	Scd2	stearoyl-Coenzyme A desaturase 2
1438561_x_at	19	46.4283	19	40.1904	43.9266	19.9374	21.1436	4930538D17Rik	RIKEN cDNA 4930538D17 gene
1416531_at	19	47.9083	19	43.9266	48.6985	3.93338	4.79249	Gsto1	glutathione S-transferase omega 1
1435440_at	19	59.3499	19	55.6055	54.7136	5.67556	4.17436	Pdzd8	PDZ domain containing 8
1455169_at	19	59.9575	19	59.2155	59.2155	6.17729	8.48813	Rab11fip2	RAB11 family interacting protein 2 (class I)
1436779_at	X	8.59221	X	8.99	8.76	3.88047	5.87881	Cybb	cytochrome b-245, beta polypeptide
1428194_at	X	12.3488	X	14.05	15.21	4.83685	4.39052	Usp9x	ubiquitin specific peptidase 9, X chromosome
1436780_at	X	97.8468	X	98.05	89.21	11.2175	10.0775	Ogt	O-linked N-acetylglucosamine (GlcNAc) transferase (UDP-N-acetylglucosamine:polypeptide-N-acetylglucosaminyl transferase)
1455213_at	X	132.301	X	125.37	126.07	11.6313	28.1509	4930488E11Rik	RIKEN cDNA 4930488E11 gene
1440046_at	X	132.423	X	138.05	121.46	3.5565	13.7936	BC031748	cDNA sequence BC031748
1442368_at	X	149.029	X	154.05	139.93	6.91749	7.21357	Kctd12b	potassium channel tetramerisation domain containing 12b
1444611_at	X	159.32	X	148.05	157.59	9.74568	22.846	U2af1-rs2	U2 small nuclear ribonucleoprotein auxiliary factor (U2AF) 1, related sequence 2
